# Supplementary material for: Visible-light-promoted radical amidoarylation of arylacrylamides towards amidated oxindoles
Source: Royal Society of Chemistry journal article supplement (doi:10.1039/d2qo00127f), 2022-01-01

## Supplementary Information

### Visible-light-promoted radical amidoarylation of arylacrylamides towards amidated oxindoles

Yu-Zhao Wang, Wu-Jie Lin, Hong-Chao Liu and Wei Yu\*

*State Key Laboratory of Applied Organic Chemistry, College of Chemistry and  
Chemical Engineering, Lanzhou University, Lanzhou 730000, China.*

*yuwei@lzu.edu.cn*

#### Contents

|                                                                        |     |
|------------------------------------------------------------------------|-----|
| 1. General information .....                                           | S1  |
| 2. General procedure for the synthesis of <b>1</b> .....               | S1  |
| 3. Synthesis of <i>N</i> -pyridinium tetrafluoroborates <b>2</b> ..... | S2  |
| 4. General procedure for the synthesis of <b>3</b> .....               | S2  |
| 5. Optimization of the reaction conditions.....                        | S3  |
| 6. Inhibition experiment.....                                          | S5  |
| 7. X-ray Single crystal diffraction data of <b>3a</b> .....            | S6  |
| 8. Characterization data of compounds <b>2</b> .....                   | S7  |
| 9. Characterization data of compounds <b>3</b> .....                   | S12 |
| 10. References.....                                                    | S25 |
| 11. Copies of NMR spectra.....                                         | S26 |

## General information

The NMR spectra were recorded on a Bruker AVANCE III-400 MHz or an INOVA600 MHz spectrometer in  $\text{CDCl}_3$ ,  $\text{D}_2\text{O}$  and  $(\text{CD}_3)_2\text{CO}$ . The chemical shifts of  $^1\text{H}$  NMR spectra in  $\text{CDCl}_3$  were determined with  $\text{Si}(\text{CH}_3)_4$  as the internal standard ( $\delta = 0.00$  ppm); the chemical shifts of  $^1\text{H}$  NMR spectra were determined with the solvent peak as the standard in  $(\text{CD}_3)_2\text{CO}$  and  $\text{D}_2\text{O}$  ( $\delta = 2.05$  ppm for  $(\text{CD}_3)_2\text{CO}$ ,  $\delta = 4.79$  ppm for  $\text{D}_2\text{O}$ ). The chemical shifts in  $^{13}\text{C}$  NMR spectra were determined based on the chemical shift of  $\text{CDCl}_3$  ( $\delta = 77.0$  ppm) and  $(\text{CD}_3)_2\text{CO}$  ( $\delta = 29.0$  ppm). Multiplicities are given as: s (singlet), d (doublet), t (triplet), dd (doublet of doublets), q (quartet) or m (multiplet). HR-MS was performed on a Bruker APEXII FT-ICR mass instrument (ESI). Data collections for crystal structure were performed at room temperature (296 K) using  $\text{MoK}\alpha$  radiation on a Bruker Smart APEXII diffractometer. Flash column chromatography was carried out on silica gel (200–300 mesh). Commercially available reagents were used without further purification. A 40 W Kessil blue LED lamp (440 nm) was used as the light source. All solvents were dried following the standard procedures before use.

## 2. General procedure for the synthesis of **1**<sup>1,2</sup>

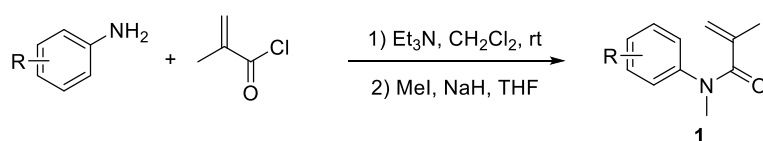

(1) Methacryloyl chloride (1.2 mL, 12 mmol, 1.2 equiv.) was added dropwise to a mixture of aniline (1.0 equiv.),  $\text{Et}_3\text{N}$  (2.8 mL, 2.0 mmol, 2.0 equiv.) in  $\text{CH}_2\text{Cl}_2$  (2.0 mL) at  $0^\circ\text{C}$ . After stirring at  $0^\circ\text{C}$  for 30 min and room temperature overnight, the mixture was quenched with saturated  $\text{NaHCO}_3$  solution. The mixture was extracted with  $\text{CH}_2\text{Cl}_2$  ( $3 \times 25$  mL), washed with brine, and dried over  $\text{Na}_2\text{SO}_4$ . After filtration and concentration, the crude amide was used in next step without further purification.

(2)  $\text{NaH}$  (0.8 g, 60% in mineral oil, 20 mmol, 2.0 equiv.) was added to a solution of the above crude amide in THF (50 mL) at  $0^\circ\text{C}$  in portions. After stirring for 20 min at  $0^\circ\text{C}$ ,  $\text{MeI}$  (1.9 mL, 3.0 mmol, 3.0 equiv.) was added dropwise and the mixture was stirred overnight. The resulting mixture was quenched with water, extracted with ethyl acetate ( $2 \times 30$  mL). The combined organic layers were washed with brine, dried over  $\text{Na}_2\text{SO}_4$ , and concentrated under reduced pressure. The crude material was purified by column chromatography on silica gel using petroleum ether (PE)/ethyl acetate (EA) to give the pure products **1a–1p**, **1t–1u**.

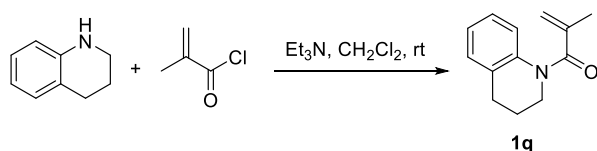

Methacryloyl chloride (1.2 mL, 12 mmol, 1.2 equiv.) was added to a mixture of tetrahydroquinoline (1.25 mL, 10 mmol, 1.0 equiv.), Et<sub>3</sub>N (2.8 mL, 2.0 mmol, 2.0 equiv.) in CH<sub>2</sub>Cl<sub>2</sub> (2.0 mL) at 0 °C dropwise. After stirring at 0 °C for 30 min and room temperature overnight, the mixture was quenched with saturated NaHCO<sub>3</sub> solution. The mixture was extracted with CH<sub>2</sub>Cl<sub>2</sub> (3×25 mL), and the combined organic phases were washed with brine, and dried over Na<sub>2</sub>SO<sub>4</sub>. After filtration and concentration, the crude material was purified by column chromatography on silica gel using PE/EA to give the pure product **1q**. Compounds **1q–1s** and **1v** were prepared in the same way.

### 3. Synthesis of *N*-pyridinium tetrafluoroborates **2**<sup>3</sup>

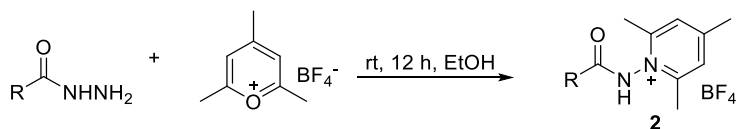

To a solution of pyrylium salt (1.0 equiv.) in ethanol was added hydrazine (1.0 equiv.) at room temperature. The reaction mixture was stirred at room temperature for 12 h. The mixture was cooled to 0 °C and petroleum ether was added. The precipitate was collected, washed with Et<sub>2</sub>O and dried to give products **2**.

### 4. General procedure for the preparation of **3**

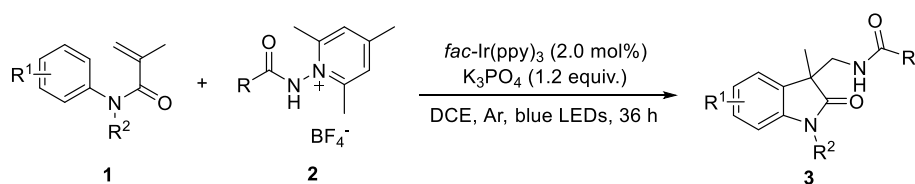

**1** (0.3 mmol, 1.5 equiv.), **2** (0.2 mmol, 1.0 equiv.), K<sub>3</sub>PO<sub>4</sub> (0.24 mmol, 1.2 equiv.) and *fac*-Ir(ppy)<sub>3</sub> (2.0 mol%, 0.02 equiv.) were added into an 15 mL oven-dried glass tube, and the tube was evacuated and backfilled with argon (repeated three times). Dichloroethane (DCE) (2.0 mL) was added to the tube and the reaction mixture was irradiated with a 40 W Kessil blue LED lamp (50% intensity) at ambient temperature for 36 h. After completion of the reaction (monitored by TLC), the solvent was removed under vacuum. The residue was purified by column chromatography on silica gel (eluting with PE /EA) to afford products **3**.

#### Gram-scale preparation

**1a** (1.05 g, 6.0 mmol, 1.5 equiv.), **2a** (1.3 g, 4.0 mmol, 1.0 equiv.), K<sub>3</sub>PO<sub>4</sub> (1.02 g,

4.8 mmol, 1.2 equiv.) and *fac*-Ir(ppy)<sub>3</sub> (52 mg, 2.0 mol%, 0.02 equiv.) were added into an 100 mL oven-dried glass tube, the tube was evacuated and backfilled with argon (repeated three times). DCE (30 mL) was then added to the tube and the reaction mixture was irradiated with a 40 W Kessil blue LED lamp (100% intensity) for 42 h. After completion of the reaction (monitored by TLC), the solvent was removed under vacuum. The residual was purified by column chromatography on silica gel (eluting with PE /EA) to afford 0.71 g of **3a** (61% yield).

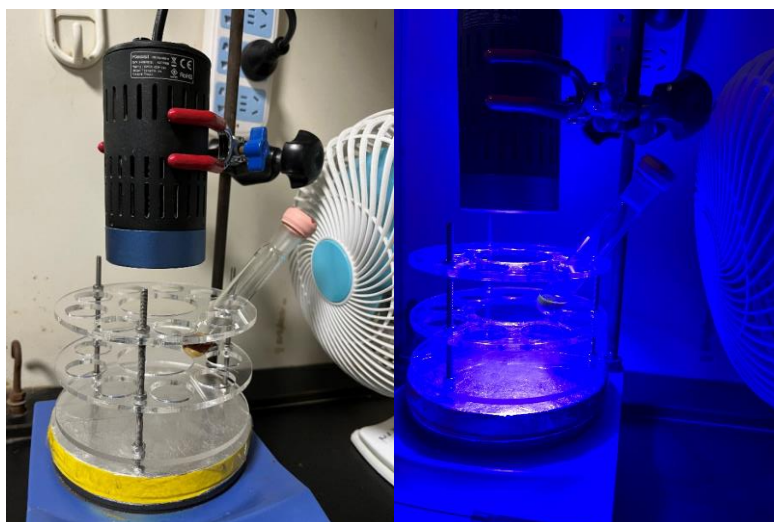

**Figure S1.** Experiment setup

## 5. Optimization of the reaction conditions

**Table S1.** Screening of the photocatalyst

| Entry | Photocatalyst                               | Yield (%) <sup>a</sup> |
|-------|---------------------------------------------|------------------------|
| 1     | <i>fac</i> -Ir(ppy) <sub>3</sub>            | 65                     |
| 2     | Ir(dtbpv)(ppy) <sub>2</sub> PF <sub>6</sub> | 23                     |
| 3     | Ru(bpy) <sub>3</sub> Cl <sub>2</sub>        | N.R.                   |
| 4     | Cu(dap) <sub>2</sub> Cl                     | N.R.                   |
| 5     | Ru(phen) <sub>3</sub> Cl <sub>2</sub>       | trace <sup>b</sup>     |
| 6     | Eosin Y                                     | trace <sup>b</sup>     |
| 7     | 4-CzIPN                                     | trace <sup>b</sup>     |

Reaction conditions: **1a** (0.1 mmol, 1.0 equiv.), **2a** (0.12 mmol, 1.2 equiv.), photocatalyst (2.0 mol%), DCM (dichloromethane) (1.0 mL), 40 W blue LED (50 % intensity), ambient temperature, 24 h, under argon atmosphere. <sup>a</sup>Isolated yields. <sup>b</sup>Most of S.M. was recovered.

**Table S2.** Screening of the solvent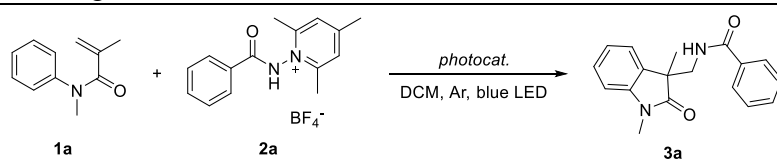

| Entry | Solvent           | Yield (%) <sup>a</sup> |
|-------|-------------------|------------------------|
| 1     | DCM               | 65                     |
| 2     | MeCN              | 58                     |
| 3     | DCE               | 68                     |
| 4     | CHCl <sub>3</sub> | 54                     |
| 5     | THF               | N.R.                   |
| 6     | HFIP              | N.R.                   |
| 7     | DMF               | trace <sup>d</sup>     |
| 8     | DMSO              | 41                     |
| 9     | toluene           | 32                     |
| 10    | MeOH              | 10                     |
| 11    | Acetone           | 58                     |

Reaction conditions: **1a** (0.1 mmol, 1.0 equiv.), **2a** (0.12 mmol, 1.2 equiv.), *fac*-Ir(ppy)<sub>3</sub> (2.0 mol%), solvent (1.0 mL), 40 W blue LEDs (50 % intensity), room temperature, 24 h, under argon atmosphere. <sup>a</sup>Isolated yields. <sup>b</sup>Most of S.M. was recovered. HFIP = hexafluoroisopropanol.

**Table S3.** Screening of the additive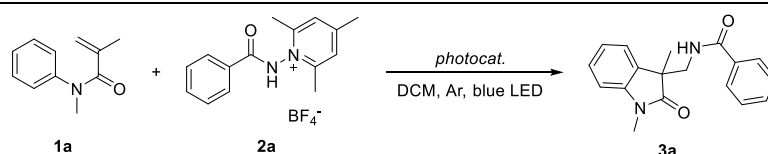

| Entry | Photocatalyst                               | Solvent           | Additive (equiv.)                    | Yield (%) <sup>a</sup> |
|-------|---------------------------------------------|-------------------|--------------------------------------|------------------------|
| 1     | <i>fac</i> -Ir(ppy) <sub>3</sub>            | DCM               | InCl <sub>3</sub> (0.2)              | 54                     |
| 2     | <i>fac</i> -Ir(ppy) <sub>3</sub>            | DCM               | FeCl <sub>3</sub> (0.2)              | 56                     |
| 3     | <i>fac</i> -Ir(ppy) <sub>3</sub>            | DCM               | K <sub>3</sub> PO <sub>4</sub> (1.0) | 61                     |
| 4     | <i>fac</i> -Ir(ppy) <sub>3</sub>            | DCE               | K <sub>3</sub> PO <sub>4</sub> (1.0) | 73                     |
| 5     | <i>fac</i> -Ir(ppy) <sub>3</sub>            | CHCl <sub>3</sub> | K <sub>3</sub> PO <sub>4</sub> (1.0) | 65                     |
| 6     | <i>fac</i> -Ir(ppy) <sub>3</sub>            | DMSO              | K <sub>3</sub> PO <sub>4</sub> (1.0) | 20                     |
| 7     | Ir(dtbpv)(ppy) <sub>2</sub> PF <sub>6</sub> | DCM               | K <sub>3</sub> PO <sub>4</sub> (1.0) | 71                     |
| 8     | Ir(dtbpv)(ppy) <sub>2</sub> PF <sub>6</sub> | MeCN              | NaOAc (1.0)                          | 65                     |
| 9     | Ir(dtbpv)(ppy) <sub>2</sub> PF <sub>6</sub> | DCM               | NaOAc (1.0)                          | 68                     |

Reaction conditions: **1a** (0.1 mmol, 1.0 equiv.), **2a** (0.12 mmol, 1.2 equiv.), *fac*-Ir(ppy)<sub>3</sub> (2.0 mol%), solvent (1.0 mL), 40 W blue LED (50 % intensity), room temperature, 24 h, under argon atmosphere. <sup>a</sup>Isolated yields.

**Table S4.** Effect of the ratio of **1a** with **2a**

| Entry    | <b>1a</b>  | <b>2a</b>  | Solvent           | Yield of <b>3a</b> (%) <sup>b</sup> |
|----------|------------|------------|-------------------|-------------------------------------|
| 1        | 1.0        | 1.5        | MeCN              | 69                                  |
| 2        | 1.0        | 1.5        | DCM               | 70                                  |
| 3        | 1.0        | 1.5        | DCE               | 73                                  |
| 4        | 1.0        | 1.5        | CHCl <sub>3</sub> | 61                                  |
| 5        | 1.5        | 1.0        | MeCN              | 56                                  |
| 6        | 1.5        | 1.0        | DCM               | 74                                  |
| <b>7</b> | <b>1.5</b> | <b>1.0</b> | <b>DCE</b>        | <b>81</b>                           |
| 8        | 1.5        | 1.0        | CHCl <sub>3</sub> | 64                                  |
| 9        | 1.5        | 1.0        | DCE               | 58 <sup>c</sup>                     |
| 10       | 1.5        | 1.0        | DCE               | 74 <sup>d</sup>                     |

Reaction conditions: **1a** (0.1 mmol, 1.0 equiv.), **2a** (0.12 mmol, 1.2 equiv.), *fac*-Ir(ppy)<sub>3</sub> (2.0 mol%), solvent (1.0 mL), K<sub>3</sub>PO<sub>4</sub> (1.2 equiv.), 40 W blue LED (50 % intensity), room temperature, 36 h, under argon atmosphere. <sup>b</sup>Isolated yields. <sup>c</sup>Reaction time 12 h, <sup>d</sup>Reaction time 24 h.

**Table S5.** Screening of the base

| Entry | <b>1a</b> | <b>2a</b> | Base                            | Yield of <b>3a</b> (%) <sup>a</sup> |
|-------|-----------|-----------|---------------------------------|-------------------------------------|
| 1     | 1.5       | 1.0       | Na <sub>3</sub> PO <sub>4</sub> | 61                                  |
| 2     | 1.5       | 1.0       | K <sub>2</sub> CO <sub>3</sub>  | 64                                  |
| 3     | 1.5       | 1.0       | NaOAc                           | 60                                  |
| 4     | 1.5       | 1.0       | Et <sub>3</sub> N               | 41                                  |
| 5     | 1.5       | 1.0       | no                              | 61                                  |
| 6     | 1.5       | 1.0       | K <sub>3</sub> PO <sub>4</sub>  | N.R. <sup>b</sup>                   |
| 7     | 1.5       | 1.0       | K <sub>3</sub> PO <sub>4</sub>  | N.R. <sup>c</sup>                   |
| 8     | 1.5       | 1.0       | DBU                             | 48                                  |
| 9     | 1.5       | 1.0       | DABCO                           | 23                                  |

Reaction conditions: **1a** (0.1 mmol, 1.0 equiv.), **2a** (0.12 mmol, 1.2 equiv.), *fac*-Ir(ppy)<sub>3</sub> (2.0 mol%), solvent (1.0 mL), base (1.2 equiv.), 40 W blue LED (50 % intensity), room temperature, 36 h, under argon atmosphere. <sup>a</sup>Isolated yields. <sup>b</sup>In the dark, <sup>c</sup>No photocatalyst.

## 6. Inhibition experiment

### TEMPO trapping experiment.

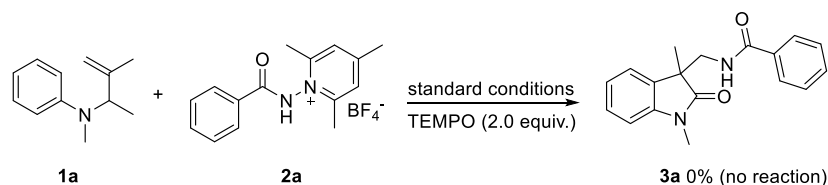

**1a** (0.3 mmol, 1.5 equiv.), **2a** (0.2 mmol, 1.0 equiv.), K<sub>3</sub>PO<sub>4</sub> (0.24 mmol, 1.2 equiv.), 2,2,6,6-tetramethyl-1-piperidinyloxy (TEMPO) (2.0 equiv.) and *fac*-Ir(ppy)<sub>3</sub> (2.0 mol%, 0.02 equiv.) were added sequentially into an oven-dried glass tube, the tube was evacuated and backfilled with argon (repeated three times). DCE (2.0 mL) was then added to the tube and the reaction mixture was irradiated with a 40 W kessil

blue LED lamp (50% intensity) for 36 h. TLC analysis indicates that no reaction took place and **3a** was not generated. **1a** and TEMPO were recovered mostly.

### BHT trapping experiment.

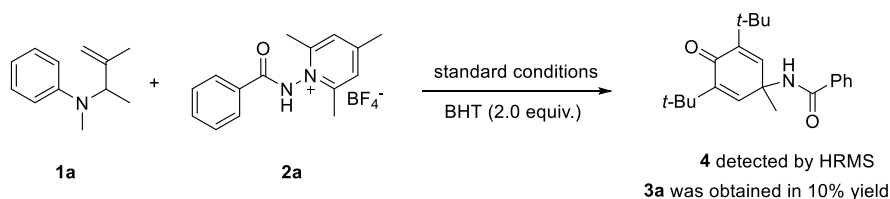

**1a** (0.3 mmol, 1.5 equiv.), **2a** (0.2 mmol, 1.0 equiv.),  $\text{K}_3\text{PO}_4$  (0.24 mmol, 1.2 equiv.), 2,6-di-tert-butyl-4-methylphenol (BHT) (2.0 equiv.) and *fac*- $\text{Ir}(\text{ppy})_3$  (2.0 mol%, 0.02 equiv.) were added sequentially into an oven-dried glass tube, the tube was evacuated and backfilled with argon (repeated three times). DCE (2.0 mL) was then added to the tube and the reaction mixture was irradiated with a 40 W kessil blue LED (50% intensity) lamp for 36 h. After completion of the reaction (monitored by TLC), the solvent was removed under vacuum. The crude product was purified by flash chromatography on silica gel directly to give the desired product **3a** with 10% yield. The BHT trapping product **4** was detected by HRMS. HRMS (EI) for **4**:  $m/z$  [ $\text{M} + \text{H}$ ]<sup>+</sup> calcd for  $\text{C}_{22}\text{H}_{29}\text{NO}_2$ : 340.2271; Found: 340.2272.

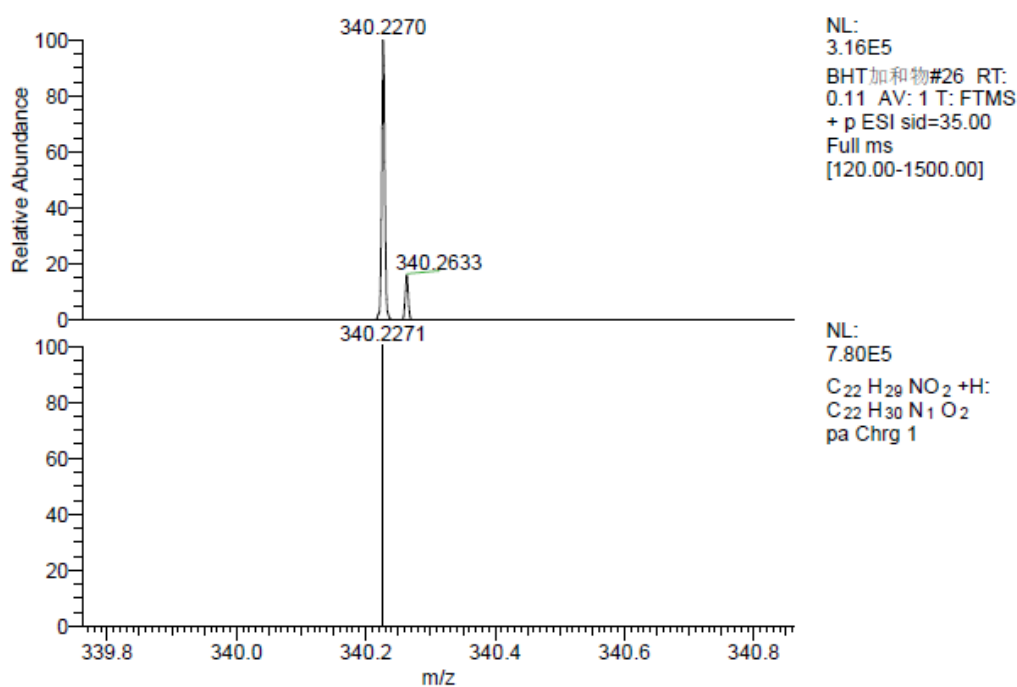

## 7. X-ray Single crystal diffraction data of 3a

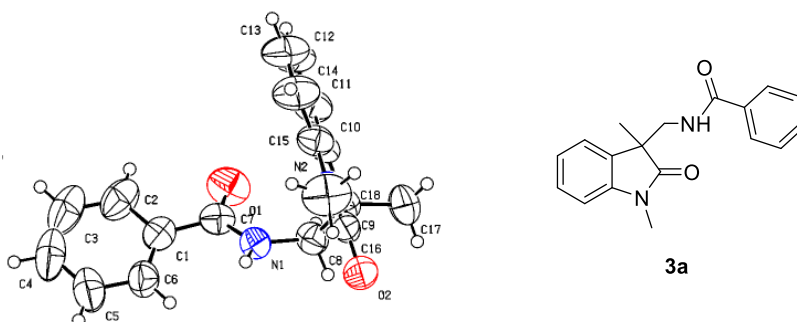


---

Bond precision: C-C = 0.0026 Å      Wavelength= 1.54184

Cell:                    a=9.1402(4)                    b=9.4815(4)                    c=18.9795(6)  
                               alpha=96.936(3)                beta=91.503(3)                gamma=101.596(3)

Temperature:            303 K

|                        | Calculated                                                    | Reported                                                      |
|------------------------|---------------------------------------------------------------|---------------------------------------------------------------|
| Volume                 | 1597.30(11)                                                   | 1597.29(11)                                                   |
| Space group            | P -1                                                          | P -1                                                          |
| Hall group             | -P 1                                                          | -P 1                                                          |
| Moiety formula         | C <sub>18</sub> H <sub>18</sub> N <sub>2</sub> O <sub>2</sub> | C <sub>18</sub> H <sub>18</sub> N <sub>2</sub> O <sub>2</sub> |
| Sum formula            | C <sub>18</sub> H <sub>18</sub> N <sub>2</sub> O <sub>2</sub> | C <sub>18</sub> H <sub>18</sub> N <sub>2</sub> O <sub>2</sub> |
| Mr                     | 294.34                                                        | 294.34                                                        |
| Dx, g cm <sup>-3</sup> | 1.224                                                         | 1.224                                                         |
| Z                      | 4                                                             | 4                                                             |
| Mu (mm <sup>-1</sup> ) | 0.647                                                         | 0.647                                                         |
| F000                   | 624.0                                                         | 624.0                                                         |
| F000'                  | 625.84                                                        |                                                               |
| h,k,lmax               | 11, 11, 23                                                    | 11, 11, 23                                                    |
| Nref                   | 6707                                                          | 6407                                                          |
| Tmin,Tmax              | 0.890,0.950                                                   | 0.691,1.000                                                   |
| Tmin'                  | 0.862                                                         |                                                               |

Correction method= # Reported T Limits: Tmin=0.691 Tmax=1.000  
 AbsCorr = MULTI-SCAN

Data completeness= 0.955

Theta(max)= 76.545

R(reflections)= 0.0433( 4837)

wR2(reflections)= 0.1308( 6407)

S = 1.060

Npar= 402

---



## 8. Characterization data of compounds 2

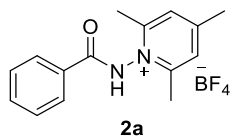

**1-Benzamido-2,4,6-trimethylpyridin-1-ium tetrafluoroborate (2a):** yellow solid; m.p. = 98–100 °C;  $^1\text{H}$  NMR ( $\text{CDCl}_3$ , 400 MHz)  $\delta$ : 11.25 (s, 1H), 8.09 (d,  $J = 7.7$  Hz, 2H), 7.68 (t,  $J = 7.4$  Hz, 1H), 7.56–7.55 (m, 4H), 2.69 (s, 6H), 2.60 (s, 3H);  $^{13}\text{C}$  NMR ( $\text{CDCl}_3$ , 100 MHz)  $\delta$ : 164.2, 160.6, 157.7, 134.1, 129.3, 128.5, 128.0, 127.7, 22.0, 19.3; HRMS-ESI (m/z)  $[\text{M}]^+$  calcd for  $\text{C}_{15}\text{H}_{17}\text{N}_2\text{O}^+$ : 241.1335; Found, 241.1340.

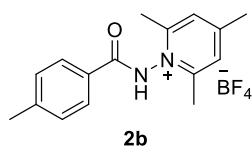

**2,4,6-Trimethyl-1-(4-methylbenzamido)pyridin-1-ium tetrafluoroborate (2b):** white solid; m.p. = 136–138 °C;  $^1\text{H}$  NMR ( $\text{CDCl}_3$ , 400 MHz)  $\delta$ : 11.21 (s, 1H), 7.99 (d,  $J = 8.3$  Hz, 2H), 7.56 (s, 2H), 7.37 (d,  $J = 8.0$  Hz, 2H), 2.70 (s, 6H), 2.61 (s, 3H), 2.46 (s, 3H);  $^{13}\text{C}$  NMR ( $\text{CDCl}_3$ , 100 MHz)  $\delta$ : 164.2, 160.3, 157.9, 145.2, 129.9, 128.0, 127.6, 125.7, 22.0, 21.7, 19.4; HRMS-ESI (m/z)  $[\text{M}]^+$  calcd for  $\text{C}_{16}\text{H}_{19}\text{N}_2\text{O}^+$ : 255.1492; Found, 255.1494.

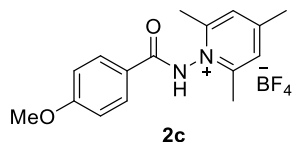

**1-(4-Methoxybenzamido)-2,4,6-trimethylpyridin-1-ium tetrafluoroborate (2c):** white solid; m.p. = 126–128 °C;  $^1\text{H}$  NMR ( $\text{CDCl}_3$ , 400 MHz)  $\delta$ : 11.16 (s, 1H), 8.09–8.05 (m, 2H), 7.54 (s, 2H), 7.06–7.03 (m, 2H), 3.90 (s, 3H), 2.70 (s, 6H), 2.61 (s, 3H);  $^{13}\text{C}$  NMR ( $\text{CDCl}_3$ , 100 MHz)  $\delta$ : 164.3, 163.8, 160.2, 158.0, 130.2, 127.6, 120.6, 114.5, 55.6, 22.1, 19.4; HRMS-ESI (m/z)  $[\text{M}]^+$  calcd for  $\text{C}_{16}\text{H}_{19}\text{N}_2\text{O}_2^+$ : 271.1441; Found, 271.1443.

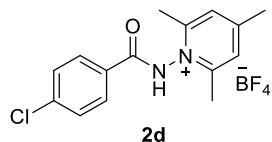

**1-(4-Chlorobenzamido)-2,4,6-trimethylpyridin-1-ium tetrafluoroborate (2d):** white solid; m.p. = 154–156 °C;  $^1\text{H}$  NMR ( $\text{CDCl}_3$ , 400 MHz)  $\delta$ : 11.22 (s, 1H), 7.98 (d,  $J = 8.3$  Hz, 2H), 7.56 (s, 1H), 7.37 (d,  $J = 8.0$  Hz, 2H), 2.70 (s, 6H), 2.61 (s, 3H), 2.46 (s, 3H);  $^{13}\text{C}$  NMR ( $\text{CDCl}_3$ , 100 MHz)  $\delta$ : 163.3, 160.7, 157.6, 140.7, 129.6, 129.5, 127.8, 126.9, 22.0, 19.3; HRMS-ESI (m/z)  $[\text{M}]^+$  calcd for  $\text{C}_{15}\text{H}_{16}\text{ClN}_2\text{O}^+$ : 275.0946; Found,

275.0946.

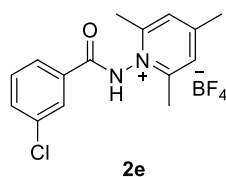

2e

**1-(3-Chlorobenzamido)-2,4,6-trimethylpyridin-1-ium tetrafluoroborate (2e):**

white solid; m.p. = 142–144 °C;  $^1\text{H}$  NMR ( $\text{CDCl}_3$ , 400 MHz)  $\delta$ : 11.40 (s, 1H), 8.06 (t,  $J$  = 1.8 Hz, 1H), 8.01 (d,  $J$  = 7.8 Hz, 1H), 7.67–7.65 (m, 2H), 7.57–7.52 (m, 3H), 2.71 (s, 6H), 2.63 (s, 3H);  $^{13}\text{C}$  NMR ( $\text{CDCl}_3$ , 100 MHz)  $\delta$ : 163.1, 160.7, 157.7, 135.6, 134.2, 130.8, 130.2, 128.6, 127.7, 125.6, 22.1, 19.4; HRMS-ESI ( $m/z$ ) [ $\text{M}$ ] $^+$  calcd for  $\text{C}_{15}\text{H}_{16}\text{ClN}_2\text{O}^+$ : 275.0946; Found, 275.0948.

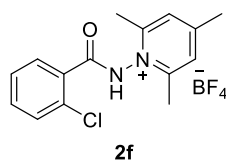

2f

**1-(2-Chlorobenzamido)-2,4,6-trimethylpyridin-1-ium tetrafluoroborate (2f):**

white solid; m.p. = 138–140 °C;  $^1\text{H}$  NMR ( $\text{CDCl}_3$ , 600 MHz)  $\delta$ : 11.07 (s, 1H), 7.76 (d,  $J$  = 5.0 Hz, 1H), 7.59 (s, 2H), 7.53 (d,  $J$  = 2.6 Hz, 2H), 7.47–7.43 (m, 1H), 2.78 (s, 6H), 2.60 (s, 3H);  $^{13}\text{C}$  NMR ( $\text{CDCl}_3$ , 150 MHz)  $\delta$ : 163.8, 160.9, 157.8, 133.5, 132.1, 131.1, 129.8, 129.6, 127.8, 127.6, 22.1, 19.6; HRMS-ESI ( $m/z$ ) [ $\text{M}$ ] $^+$  calcd for  $\text{C}_{15}\text{H}_{16}\text{ClN}_2\text{O}^+$ : 275.0946; Found, 275.0950.

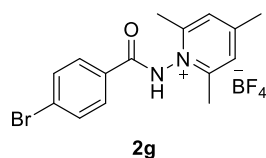

2g

**1-(4-Bromobenzamido)-2,4,6-trimethylpyridin-1-ium tetrafluoroborate (2g):**

white solid; m.p. = 140–142 °C;  $^1\text{H}$  NMR ( $\text{CDCl}_3$ , 400 MHz)  $\delta$ : 11.37 (s, 1H), 7.99–7.96 (m, 2H), 7.74–7.70 (m, 2H), 7.57 (s, 2H), 2.70 (s, 6H), 2.63 (s, 3H);  $^{13}\text{C}$  NMR ( $\text{CDCl}_3$ , 100 MHz)  $\delta$ : 163.5, 160.6, 157.7, 132.6, 129.6, 129.5, 127.7, 127.3, 22.1, 19.4; HRMS-ESI ( $m/z$ ) [ $\text{M}$ ] $^+$  calcd for  $\text{C}_{15}\text{H}_{16}\text{BrN}_2\text{O}^+$ : 319.0441; Found, 319.0444.

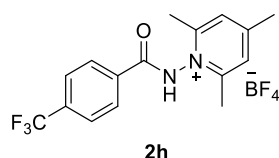

2h

**2,4,6-Trimethyl-1-(4-(trifluoromethyl)benzamido)pyridin-1-ium**

**tetrafluoroborate (2h):** white solid; m.p. = 198–200 °C;  $^1\text{H}$  NMR ( $(\text{CD}_3)_2\text{CO}$ , 400 MHz)  $\delta$ : 8.33 (d,  $J$  = 8.1 Hz, 2H), 8.03 (s, 1H), 8.01 (s, 3H), 2.82 (s, 6H), 2.72 (s, 3H);  $^{13}\text{C}$  NMR ( $(\text{CD}_3)_2\text{CO}$ , 100 MHz)  $\delta$ : 163.5, 161.8, 157.4, 134.2 (q,  $J$  = 32 Hz, 1C),

133.4, 129.1, 128.2, 126.1 (q,  $J = 5.0$  Hz, 1C), 123.8 (q,  $J = 270$  Hz, 1C), 21.2, 18.5; HRMS-ESI (m/z)  $[M]^+$  calcd for  $C_{16}H_{16}F_3N_2O^+$ : 309.1209; Found, 309.1210.

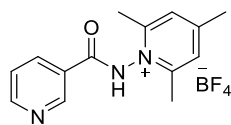

2i

**2,4,6-Trimethyl-1-(nicotinamido)pyridin-1-ium tetrafluoroborate (2i):** white solid; m.p. = 146–148 °C;  $^1H$  NMR ( $D_2O$ , 400 MHz)  $\delta$ : 9.27 (t,  $J = 0.92$  Hz, 1H), 9.06–9.03 (m, 1H), 8.89 (d,  $J = 5.8$  Hz, 1H), 8.16–8.13 (m, 1H), 7.55 (s, 2H), 2.50 (s, 6H), 2.48 (s, 3H);  $^{13}C$  NMR ( $D_2O$ , 100 MHz)  $\delta$ : 165.5, 154.9, 152.4, 145.0, 143.1, 141.3, 134.9, 127.2, 127.0, 20.4, 18.2; HRMS-ESI (m/z)  $[M]^+$  calcd for  $C_{14}H_{16}N_3O^+$ : 242.1288; Found, 242.1291.

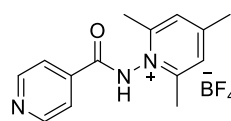

2j

**1-(Isonicotinamido)-2,4,6-trimethylpyridin-1-ium tetrafluoroborate (2j):** white solid; m.p. = 142–144 °C;  $^1H$  NMR ( $D_2O$ , 400 MHz)  $\delta$ : 8.77 (d,  $J = 6.4$  Hz, 2H), 8.36 (d,  $J = 6.8$  Hz, 2H), 7.43 (s, 2H), 2.38 (s, 6H), 2.36 (s, 3H);  $^{13}C$  NMR ( $D_2O$ , 100 MHz)  $\delta$ : 166.6, 154.8, 152.6, 152.0, 142.0, 127.0, 125.5, 20.4, 18.1; HRMS-ESI (m/z)  $[M]^+$  calcd for  $C_{14}H_{16}N_3O^+$ : 242.1288; Found, 242.1285.

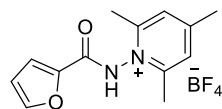

2k

**1-(Furan-2-carboxamido)-2,4,6-trimethylpyridin-1-ium tetrafluoroborate (2j):** white solid; m.p. = 122–124 °C;  $^1H$  NMR ( $CDCl_3$ , 400 MHz)  $\delta$ : 11.25 (s, 1H), 7.73 (s, 1H), 7.56 (s, 2H), 7.48 (d,  $J = 3.5$  Hz, 1H), 2.72 (s, 6H), 2.62 (s, 3H);  $^{13}C$  NMR ( $CDCl_3$ , 100 MHz)  $\delta$ : 160.7, 158.1, 155.2, 147.5, 143.1, 127.3, 118.8, 112.7, 22.2, 19.5; HRMS-ESI (m/z)  $[M]^+$  calcd for  $C_{13}H_{15}N_2O_2^+$ : 231.1128; Found, 231.1130.

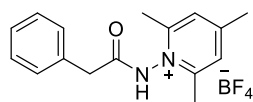

2l

**2,4,6-Trimethyl-1-(2-phenylacetamido)pyridin-1-ium tetrafluoroborate (2l) :** white solid; m.p. = 102–104 °C;  $^1H$  NMR ( $(CD_3)_2CO$ , 400 MHz)  $\delta$ : 7.87 (s, 2H), 7.48 (d,  $J = 7.2$  Hz, 2H), 7.41–7.37 (m, 2H), 7.34–7.31 (m, 1H), 3.98 (s, 2H), 3.04 (s, 1H), 2.63 (s, 3H), 2.61 (s, 6H);  $^{13}C$  NMR ( $(CD_3)_2CO$ , 100 MHz)  $\delta$ : 168.5, 161.3, 157.2, 133.7, 129.5, 128.7, 127.9, 127.4, 40.1, 20.1, 18.3; HRMS-ESI (m/z)  $[M]^+$  calcd for  $C_{16}H_{19}N_2O^+$ : 255.1492; Found, 255.1488.

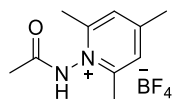

2m

**1-Acetamido-2,4,6-trimethylpyridin-1-ium tetrafluoroborate (2m):** white solid; m.p. = 103–105 °C;  $^1\text{H}$  NMR ( $(\text{CD}_3)_2\text{CO}$ , 400 MHz)  $\delta$ : 7.91 (s, 2H), 2.72 (s, 6H), 2.65 (s, 3H), 2.32 (s, 3H);  $^{13}\text{C}$  NMR ( $(\text{CD}_3)_2\text{CO}$ , 100 MHz)  $\delta$ : 167.7, 161.2, 157.2, 127.9, 21.0, 19.6, 18.4; HRMS-ESI (m/z)  $[\text{M}]^+$  calcd for  $\text{C}_{10}\text{H}_{15}\text{N}_2\text{O}^+$ : 179.1179; Found, 179.1182.

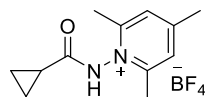

2n

**1-(Cyclopropanecarboxamido)-2,4,6-trimethylpyridin-1-ium tetrafluoroborate (2n):** white solid; m.p. = 99–101 °C;  $^1\text{H}$  NMR ( $\text{CDCl}_3$ , 400 MHz)  $\delta$ : 10.74, (s, 1H), 7.58 (s, 2H), 2.64 (s, 6H), 2.58 (s, 3H), 1.97-1.94 (m, 1H), 1.10–1.06 (m, 4H);  $^{13}\text{C}$  NMR ( $\text{CDCl}_3$ , 100 MHz)  $\delta$ : 171.9, 160.8, 157.4, 127.8, 21.9, 19.2, 12.3, 9.0; HRMS-ESI (m/z)  $[\text{M}]^+$  calcd for  $\text{C}_{12}\text{H}_{17}\text{N}_2\text{O}^+$ : 205.1335; Found, 205.1339.

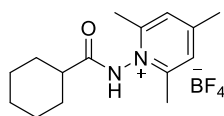

2o

**1-(Cyclohexanecarboxamido)-2,4,6-trimethylpyridin-1-ium tetrafluoroborate (2n):** white solid; m.p. = 122–124 °C;  $^1\text{H}$  NMR ( $(\text{CD}_3)_2\text{CO}$ , 400 MHz)  $\delta$ : 7.91 (s, 2H), 3.07 (s, 1H), 2.75–2.68 (m, 7H), 2.65 (s, 3H), 2.02 (m, 1H), 1.84–1.80 (m, 2H), 1.73–1.68 (m, 1H), 1.57 (dq,  $J = 3.0, 12.2$  Hz, 2H), 1.40 (td,  $J = 3.2, 12.4$  Hz, 2H), 1.29 (tt,  $J = 2.8, 12.0$  Hz, 1H) 1.14–1.09 (m, 1H);  $^{13}\text{C}$  NMR ( $(\text{CD}_3)_2\text{CO}$ , 100 MHz)  $\delta$ : 173.1, 161.1, 157.1, 127.9, 42.4, 25.4, 25.1, 21.1, 18.4; HRMS-ESI (m/z)  $[\text{M}]^+$  calcd for  $\text{C}_{15}\text{H}_{23}\text{N}_2\text{O}^+$ : 247.1805; Found, 247.1807.

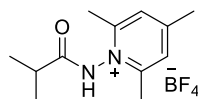

2p

**1-Isobutyramido-2,4,6-trimethylpyridin-1-ium tetrafluoroborate (2p):** white solid; m.p. = 108–110 °C;  $^1\text{H}$  NMR ( $(\text{CD}_3)_2\text{CO}$ , 400 MHz)  $\delta$ : 7.92 (s, 2H), 2.69 (s, 6H), 2.64 (s, 3H), 1.30 (s, 3H), 1.29 (s, 3H);  $^{13}\text{C}$  NMR ( $(\text{CD}_3)_2\text{CO}$ , 100 MHz)  $\delta$ : 174.2, 161.2, 157.1, 128.0, 33.0, 21.1, 18.4; HRMS-ESI (m/z)  $[\text{M}]^+$  calcd for  $\text{C}_{12}\text{H}_{19}\text{N}_2\text{O}^+$ : 207.1492; Found, 207.1489.

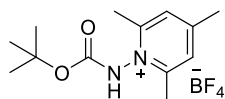

2q

**1-((Tert-butoxycarbonyl)amino)-2,4,6-trimethylpyridin-1-ium tetrafluoroborate (2q):** white solid; m.p. = 92–94 °C;  $^1\text{H}$  NMR ( $\text{CDCl}_3$ , 400 MHz)  $\delta$ : 9.54 (s, 1H), 7.61 (s, 2H), 2.67, (s, 6H), 2.57 (s, 3H), 1.53 (s, 9H);  $^{13}\text{C}$  NMR ( $\text{CDCl}_3$ , 100 MHz)  $\delta$ : 160.9, 158.0, 152.0, 127.8, 84.7, 27.9, 22.0, 19.1; HRMS-ESI (m/z)  $[\text{M}]^+$  calcd for  $\text{C}_{13}\text{H}_{21}\text{N}_2\text{O}_2^+$ : 237.1598; Found, 237.1599.

## 9. Characterization data of compounds 3

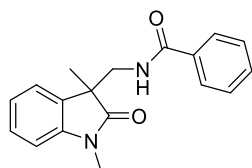

3a

**N-((1,3-Dimethyl-2-oxoindolin-3-yl)methyl)benzamide (3a):** The resultant residue was purified by flash silica gel column chromatography to afford **3a** as colorless solid (46 mg, 78%); m.p. = 112–114 °C;  $^1\text{H}$  NMR ( $\text{CDCl}_3$ , 400 MHz)  $\delta$ : 7.82–7.80 (m, 2H), 7.52–7.48 (m, 1H), 7.45–7.38 (m, 3H), 7.34–7.30 (m, 2H), 7.12 (m, 1H), 6.89 (m, 1H), 4.24 (dd,  $J = 8.4, 13.6$ , 1H), 3.27–3.23 (m, 4H), 1.47 (s, 3H);  $^{13}\text{C}$  NMR ( $\text{CDCl}_3$ , 100 MHz)  $\delta$ : 180.3, 167.5, 142.8, 134.3, 132.0, 131.5, 128.6, 128.5, 127.0, 123.2, 123.1, 108.4, 47.2, 45.1, 26.3, 20.2; HRMS-ESI (m/z)  $[\text{M} + \text{H}]^+$  calcd for  $\text{C}_{18}\text{H}_{18}\text{N}_2\text{O}_2$ : 295.1441; Found, 295.1445.

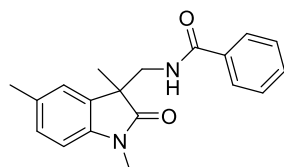

3b

**N-((1,3,6-Trimethyl-2-oxoindolin-3-yl)methyl)benzamide (3b):** The resultant residue was purified by flash silica gel column chromatography to afford **3b** as white solid (39 mg, 68%); m.p. = 81–83 °C;  $^1\text{H}$  NMR ( $\text{CDCl}_3$ , 400 MHz)  $\delta$ : 7.84–7.82 (m, 2H), 7.52–7.39 (m, 4H), 7.14–7.10 (m, 2H), 6.78 (d,  $J = 7.8$  Hz, 1H), 4.26 (dd,  $J = 8.6, 13.6$  Hz, 1H), 3.23 (s, 3H), 3.18 (dd,  $J = 2.5, 13.6$  Hz, 1H), 2.36 (s, 3H), 1.46 (s, 3H);  $^{13}\text{C}$  NMR ( $\text{CDCl}_3$ , 100 MHz)  $\delta$ : 180.2, 167.4, 140.3, 134.3, 132.8, 132.1, 131.4, 128.7, 128.5, 126.9, 123.8, 108.1, 47.0, 45.1, 26.2, 21.1, 20.2; HRMS-ESI (m/z)  $[\text{M} + \text{H}]^+$  calcd for  $\text{C}_{19}\text{H}_{20}\text{N}_2\text{O}_2$ : 309.1598; Found, 309.1601.

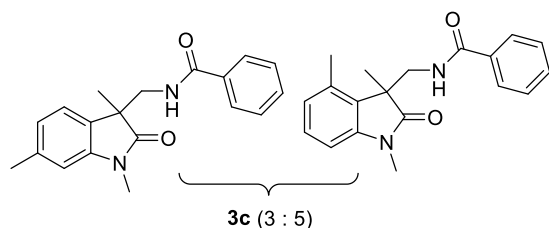

***N*-((1,3,4-Trimethyl-2-oxoindolin-3-yl)methyl)benzamide or *N*-((1,3,6-Trimethyl-2-oxoindolin-3-yl)methyl)benzamide (3c):** The resultant residue was purified by flash silica gel column chromatography to afford **3c** as yellow solid (37 mg, 61%); m.p. = 116–118 °C; <sup>1</sup>H NMR (CDCl<sub>3</sub>, 400 MHz) δ: 7.83–7.77 (m, 3.3H), 7.52–7.38 (m, 7H), 7.23–7.18 (m, 1.7H), 6.94–6.88 (m, 1.6H), 6.73 (d, *J* = 7.6 Hz, 1.6H), 4.48 (dd, *J* = 8.2, 13.6 Hz, 1H), 4.23 (dd, *J* = 8.2, 13.6 Hz, 0.6H), 3.33 (dd, *J* = 3.0, 13.6 Hz, 1H), 3.24–3.19 (m, 5.5H), 2.50 (s, 3H), 2.40 (s, 1.8H), 1.55 (s, 3H), 1.45 (s, 1.8H); <sup>13</sup>C NMR (CDCl<sub>3</sub>, 100 MHz) δ: 180.5, 180.2, 167.4, 143.1, 142.8, 138.7, 135.0, 134.2, 131.4, 129.0, 128.8, 128.5, 128.3, 126.9, 126.9, 125.8, 123.6, 122.7, 109.3, 106.1, 48.0, 46.9, 45.1, 26.3, 26.1, 21.7, 20.2, 18.4, 18.1; HRMS-ESI (m/z) [M + H]<sup>+</sup> calcd for C<sub>19</sub>H<sub>20</sub>N<sub>2</sub>O<sub>2</sub>: 309.1598; Found, 309.1601.

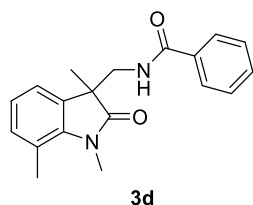

***N*-((1,3,7-Trimethyl-2-oxoindolin-3-yl)methyl)benzamide (3d):** The resultant residue was purified by flash silica gel column chromatography to afford **3d** as yellow oil (17 mg, 28%); <sup>1</sup>H NMR (CDCl<sub>3</sub>, 400 MHz) δ: 7.86–7.83 (m, 2H), 7.53–7.43 (m, 4H), 7.15 (dd, *J* = 1.3, 6.9 Hz, 1H), 7.06–6.99 (m, 2H), 4.24 (dd, *J* = 8.6, 13.6 Hz, 1H), 3.53 (s, 3H), 3.15 (dd, *J* = 2.5, 13.6 Hz, 1H), 2.60 (s, 3H), 1.44 (s, 3H); <sup>13</sup>C NMR (CDCl<sub>3</sub>, 100 MHz) δ: 181.1, 167.5, 140.5, 134.3, 132.7, 132.3, 131.5, 128.6, 127.0, 123.1, 120.9, 120.1, 46.3, 45.3, 29.6, 20.6, 19.0; HRMS-ESI (m/z) [M + H]<sup>+</sup> calcd for C<sub>19</sub>H<sub>20</sub>N<sub>2</sub>O<sub>2</sub>: 309.1598; Found, 309.1600.

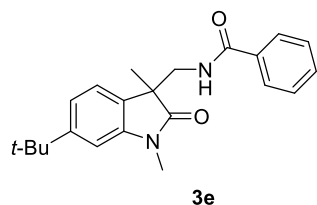

***N*-((6-(*tert*-Butyl)-1,3-dimethyl-2-oxoindolin-3-yl)methyl)benzamide (3e):** The resultant residue was purified by flash silica gel column chromatography to afford **3e** as yellow oil (43 mg, 62%); <sup>1</sup>H NMR (CDCl<sub>3</sub>, 400 MHz) δ: 7.87–7.85 (m, 2H),

7.53–7.43 (m, 4H), 7.36–7.34 (m, 2H), 6.83 (dd,  $J = 0.8, 8.0$  Hz, 1H), 4.31 (dd,  $J = 8.7, 13.6$  Hz, 1H), 3.24 (s, 3H), 3.16 (dd,  $J = 2.3, 13.6$  Hz, 1H), 1.48, (s, 3H), 1.33 (s, 9H);  $^{13}\text{C}$  NMR ( $\text{CDCl}_3$ , 100 MHz)  $\delta$ : 180.6, 167.6, 146.6, 140.4, 134.4, 131.8, 131.5, 128.6, 127.0, 125.1, 120.2, 107.9, 47.2, 45.2, 34.7, 31.6, 26.3, 20.3; HRMS-ESI ( $m/z$ )  $[\text{M} + \text{H}]^+$  calcd for  $\text{C}_{22}\text{H}_{26}\text{N}_2\text{O}_2$ : 351.2067; Found, 351.2069.

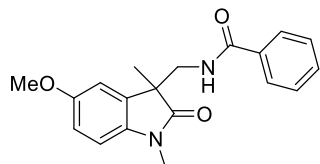

3f

***N*-((5-Methoxy-1,3-dimethyl-2-oxoindolin-3-yl)methyl)benzamide (3f)** : The resultant residue was purified by flash silica gel column chromatography to afford **3f** as yellow oil (38 mg, 59%);  $^1\text{H}$  NMR ( $\text{CDCl}_3$ , 600 MHz)  $\delta$ : 7.84–7.82 (m, 2H), 7.50 (t,  $J = 7.3$  Hz, 1H), 7.45–7.40 (m, 3H), 6.94 (d,  $J = 2.4$  Hz, 1H), 6.85–6.83 (m, 1H), 6.81–6.79 (m, 1H), 4.26 (dd,  $J = 8.6, 13.6$  Hz, 1H), 3.81 (s, 3H), 3.23 (s, 3H), 3.20 (dd,  $J = 2.4, 13.6$  Hz, 1H), 1.46 (s, 3H);  $^{13}\text{C}$  NMR ( $\text{CDCl}_3$ , 150 MHz)  $\delta$ : 180.0, 167.5, 156.5, 136.2, 134.3, 133.4, 131.5, 128.6, 127.0, 113.1, 110.2, 108.9, 55.9, 47.5, 45.1, 26.3, 20.3; HRMS-ESI ( $m/z$ )  $[\text{M} + \text{H}]^+$  calcd for  $\text{C}_{19}\text{H}_{20}\text{N}_2\text{O}_3$ : 325.1547; Found, 325.1550.

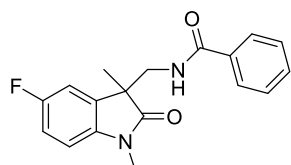

3g

***N*-((5-Fluoro-1,3-dimethyl-2-oxoindolin-3-yl)methyl)benzamide (3g)**: The resultant residue was purified by flash silica gel column chromatography to afford **3g** as white solid (45 mg, 72%); m.p. = 118–120 °C;  $^1\text{H}$  NMR ( $\text{CDCl}_3$ , 400 MHz)  $\delta$ : 7.80–7.78 (m, 2H), 7.51–7.47 (m, 1H), 7.45–7.41 (m, 2H), 7.28 (d,  $J = 6.0$  Hz, 1H), 7.08 (dd,  $J = 2.5, 7.8$  Hz, 1H), 7.01 (dt,  $J = 2.6, 8.6$  Hz, 1H), 6.80 (q,  $J = 4.2$  Hz, 1H), 4.19 (dd,  $J = 8.2, 13.6$  Hz, 1H), 3.29 (dd,  $J = 3.2, 13.6$  Hz, 1H), 3.24 (s, 3H);  $^{19}\text{F}$  NMR ( $\text{CDCl}_3$ , 376 MHz)  $\delta$ : 119.3;  $^{13}\text{C}$  NMR ( $\text{CDCl}_3$ , 100 MHz)  $\delta$ : 179.8, 167.4, 159.5 (d,  $J = 240$  Hz, 1C), 138.7 (d,  $J = 1.8$  Hz, 1C), 134.1, 133.6 (d,  $J = 8.0$  Hz, 1C), 131.5, 128.5, 126.9, 114.7 (d,  $J = 23.4$  Hz, 1C), 111.4, (d,  $J = 24.7$  Hz, 1C), 108.8 (d,  $J = 8.1$  Hz, 1C), 47.8 (d,  $J = 1.4$  Hz, 1C), 44.9, 26.3, 20.1; HRMS-ESI ( $m/z$ )  $[\text{M} + \text{H}]^+$  calcd for  $\text{C}_{18}\text{H}_{17}\text{FN}_2\text{O}_2$ : 313.1347; Found, 313.1349.

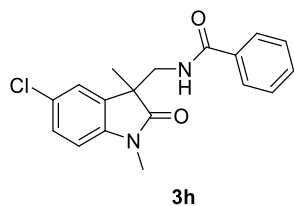

***N*-((5-Chloro-1,3-dimethyl-2-oxoindolin-3-yl)methyl)benzamide (3h):** The resultant residue was purified by flash silica gel column chromatography to afford **3h** as colorless oil (44 mg, 67%);  $^1\text{H}$  NMR ( $\text{CDCl}_3$ , 400 MHz)  $\delta$ : 7.80, (d,  $J = 7.2$  Hz, 2H), 7.50 (t,  $J = 7.6$  Hz, 1H), 7.44 (t,  $J = 7.6$  Hz, 2H), 7.31–7.24 (m, 3H), 6.81 (d,  $J = 8.0$  Hz, 1H), 4.22 (dd,  $J = 8.4, 13.6$  Hz, 1H), 3.27–3.23 (m, 4H), 1.46 (s, 3H);  $^{13}\text{C}$  NMR ( $\text{CDCl}_3$ , 100 MHz)  $\delta$ : 179.7, 167.5, 141.4, 134.1, 133.6, 131.6, 128.6, 128.5, 126.9, 123.7, 109.3, 47.6, 44.9, 26.3, 20.1; HRMS-ESI ( $m/z$ ) [ $\text{M} + \text{H}$ ] $^+$  calcd for  $\text{C}_{18}\text{H}_{17}\text{ClN}_2\text{O}_2$ : 329.1051; Found, 329.1054.

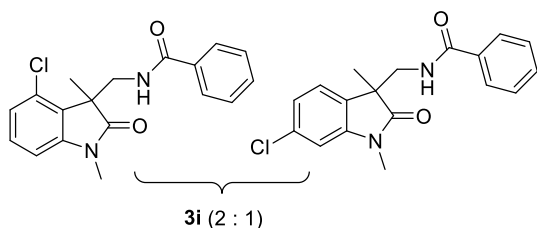

***N*-((4-Chloro-1,3-dimethyl-2-oxoindolin-3-yl)methyl)benzamide or *N*-((6-Chloro-1,3-dimethyl-2-oxoindolin-3-yl)methyl)benzamide (3i):** The resultant residue was purified by flash silica gel column chromatography to afford **3i** as yellow solid (36 mg, 55%); m.p. = 113–115 °C;  $^1\text{H}$  NMR ( $\text{CDCl}_3$ , 400 MHz)  $\delta$ : 7.80–7.76 (m, 3H), 7.53–7.41 (m, 4.5H), 7.28–7.21 (m, 3H), 7.11–7.05 (m, 1.5H), 6.89 (dd,  $J = 1.8$  Hz, 0.5H), 6.79 (dd,  $J = 0.8, 7.8$  Hz, 1H), 4.65 (dd,  $J = 8.3, 13.6$  Hz, 1H), 4.19 (dd,  $J = 8.2, 13.6$  Hz, 0.5H), 3.41 (dd,  $J = 3.0, 13.6$  Hz, 1H), 3.29 (dd,  $J = 3.3, 13.6$  Hz, 0.5H), 3.25 (s, 3H), 3.24 (s, 1.5H), 1.62 (s, 3H), 1.45 (s, 1.5H);  $^{13}\text{C}$  NMR ( $\text{CDCl}_3$ , 100 MHz)  $\delta$ : 180.2, 180.0, 167.5, 167.4, 144.7, 144.1, 134.4, 134.3, 134.2, 131.6, 131.5, 131.2, 131.0, 129.8, 128.6, 128.6, 128.1, 127.0, 124.3, 124.1, 123.0, 109.2, 106.9, 48.9, 47.3, 44.9, 42.7, 26.5, 26.4, 20.3, 17.6; HRMS-ESI ( $m/z$ ) [ $\text{M} + \text{H}$ ] $^+$  calcd for  $\text{C}_{18}\text{H}_{17}\text{ClN}_2\text{O}_2$ : 329.1051; Found, 329.1054.

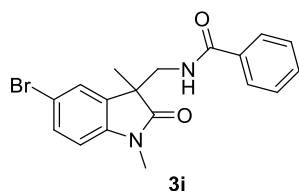

***N*-((5-Bromo-1,3-dimethyl-2-oxoindolin-3-yl)methyl)benzamide (3j):** The resultant residue was purified by flash silica gel column chromatography to afford **3j** as brown solid (43 mg, 58%); m.p. = 120–122 °C;  $^1\text{H}$  NMR ( $\text{CDCl}_3$ , 400 MHz)  $\delta$ : 7.82–7.80 (m,



2H), 7.53–7.49 (m, 1H), 7.46–7.43 (m, 4H), 7.27 (d,  $J = 10.3$  Hz, 1H), 6.78 (d,  $J = 6.4$  Hz, 1H), 4.24 (dd,  $J = 8.4, 13.6$  Hz, 1H), 3.25–3.21 (m, 4H), 1.47 (s, 3H);  $^{13}\text{C}$  NMR ( $\text{CDCl}_3$ , 100 MHz)  $\delta$ : 179.6, 167.5, 141.8, 134.1, 134.0, 131.5, 131.4, 128.5, 126.9, 126.4, 115.8, 109.8, 47.5, 44.9, 26.3, 20.1; HRMS-ESI ( $m/z$ )  $[\text{M} + \text{H}]^+$  calcd for  $\text{C}_{18}\text{H}_{17}\text{BrN}_2\text{O}_2$ : 373.0546; Found, 373.0550.

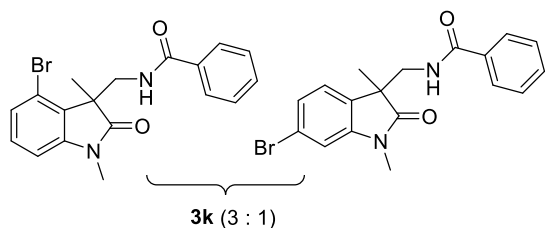

***N*-((4-Bromo-1,3-dimethyl-2-oxoindolin-3-yl)methyl)benzamide** or  
***N*-((6-Bromo-1,3-dimethyl-2-oxoindolin-3-yl)methyl)benzamide (3k):** The resultant residue was purified by flash silica gel column chromatography to afford **3k** as yellow oil (42 mg, 57%);  $^1\text{H}$  NMR ( $\text{CDCl}_3$ , 600 MHz)  $\delta$ : 7.79–7.75 (m, 2.7H), 7.50–7.47 (m, 1.4H), 7.42 (q,  $J = 8.8$  Hz, 2.7H), 7.26–7.16 (m, 4H), 7.03 (d,  $J = 1.6$  Hz, 0.3H), 6.82 (dd,  $J = 0.6, 7.6$  Hz, 1H), 4.70 (dd,  $J = 8.4, 13.6$  Hz, 1H), 4.17 (dd,  $J = 8.2, 13.6$  Hz, 0.3H), 3.42 (dd,  $J = 3.0, 13.6$  Hz, 1H), 3.31 (dd,  $J = 3.0, 13.6$  Hz, 0.3H), 3.23 (s, 3H), 3.22 (s, 1H), 1.63 (s, 3H), 1.45 (s, 1H);  $^{13}\text{C}$  NMR ( $\text{CDCl}_3$ , 150 MHz)  $\delta$ : 180.0, 179.6, 167.5, 167.3, 145.0, 144.2, 134.3, 134.2, 131.6, 131.5, 130.9, 130.0, 129.8, 128.6, 128.6, 127.4, 127.0, 127.0, 125.9, 124.5, 122.1, 119.2, 111.9, 107.4, 49.6, 47.4, 44.8, 42.5, 26.5, 26.4, 20.2, 17.5; HRMS-ESI ( $m/z$ )  $[\text{M} + \text{H}]^+$  calcd for  $\text{C}_{18}\text{H}_{17}\text{BrN}_2\text{O}_2$ : 373.0546; Found, 373.0549.

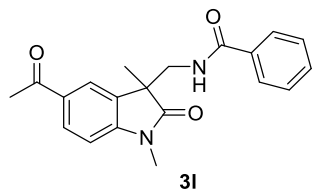

***N*-((5-acetyl-1,3-dimethyl-2-oxoindolin-3-yl)methyl)benzamide (3l):** The resultant residue was purified by flash silica gel column chromatography to afford **3l** as yellow oil (48 mg, 71%);  $^1\text{H}$  NMR ( $\text{CDCl}_3$ , 600 MHz)  $\delta$ : 8.00 (dd,  $J = 1.7, 8.2$  Hz, 1H), 7.95 (d,  $J = 1.6$  Hz, 1H), 7.79–7.77 (m, 2H), 7.51–7.48 (m, 1H), 7.44–7.42 (m, 2H), 7.19 (d,  $J = 5.6$  Hz, 1H), 6.95 (d,  $J = 8.2$  Hz, 1H), 4.27 (dd,  $J = 8.4, 13.6$  Hz, 1H), 3.32 (dd,  $J = 3.2, 13.6$  Hz, 1H), 3.29 (s, 3H), 2.60 (s, 3H), 1.51 (s, 3H);  $^{13}\text{C}$  NMR ( $\text{CDCl}_3$ , 150 MHz)  $\delta$ : 196.7, 180.5, 167.6, 147.1, 134.2, 132.6, 132.2, 131.6, 130.3, 128.6, 127.0, 123.3, 108.0, 47.4, 45.0, 26.6, 26.5, 20.2; HRMS-ESI ( $m/z$ )  $[\text{M} + \text{H}]^+$  calcd for  $\text{C}_{20}\text{H}_{20}\text{N}_2\text{O}_3$ : 337.1547; Found, 337.1551.

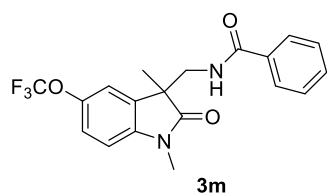

***N*-((1,3-Dimethyl-2-oxo-5-(trifluoromethoxy)indolin-3-yl)methyl)benzamide**

**(3m):** The resultant residue was purified by flash silica gel column chromatography to afford **3m** as yellow solid (50 mg, 66%); m.p. = 105–107 °C; <sup>1</sup>H NMR (CDCl<sub>3</sub>, 400 MHz) δ: 7.80–7.78 (m, 2H), 7.52–7.48 (m, 1H), 7.45–7.41 (m, 2H), 7.28–7.23 (m, 2H), 7.21–7.18 (m, 1H), 6.87 (d, *J* = 8.4 Hz, 1H), 4.21 (dd, *J* = 8.3, 13.6 Hz, 1H), 3.31 (dd, *J* = 3.2, 13.6 Hz, 1H), 3.25 (s, 3H), 1.48 (s, 3H); <sup>19</sup>F NMR (CDCl<sub>3</sub>, 376 MHz) δ: 58.3; <sup>13</sup>C NMR (CDCl<sub>3</sub>, 100 MHz) δ: 179.9, 167.5, 145.0 (q, *J* = 1.6 Hz, 1C), 141.4, 134.1, 133.5, 131.6, 128.6, 126.9, 121.6, 120.5 (q, *J* = 255 Hz, 1C), 117.2, 108.8, 47.8, 44.8, 26.4, 20.1; HRMS-ESI (*m/z*) [*M* + *H*]<sup>+</sup> calcd for C<sub>19</sub>H<sub>17</sub>F<sub>3</sub>N<sub>2</sub>O<sub>3</sub>: 379.1264; Found, 379.1266.

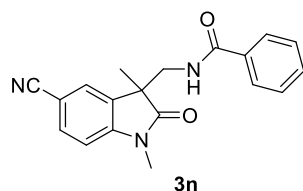

***N*-((5-Cyano-1,3-dimethyl-2-oxoindolin-3-yl)methyl)benzamide (3n):**

The resultant residue was purified by flash silica gel column chromatography to afford **3n** as white solid (50 mg, 79%); m.p. = 108–110 °C; <sup>1</sup>H NMR (CDCl<sub>3</sub>, 400 MHz) δ: 7.75 (d, *J* = 7.2 Hz, 2H), 7.64 (d, *J* = 8.1 Hz, 1H), 7.60 (s, 1H), 7.51 (t, *J* = 7.2 Hz, 1H), 7.43 (t, *J* = 7.6 Hz, 2H), 7.08 (d, *J* = 4.0 Hz, 1H), 6.95 (d, *J* = 8.2 Hz, 1H), 4.16 (dd, *J* = 8.0, 13.6 Hz, 1H), 3.42 (dd, *J* = 4.0, 13.6 Hz, 1H), 3.28 (s, 3H), 1.49 (s, 3H); <sup>13</sup>C NMR (CDCl<sub>3</sub>, 100 MHz) δ: 179.8, 167.5, 146.7, 133.9, 133.8, 133.0, 131.7, 128.6, 126.9, 126.6, 118.8, 108.8, 106.2, 47.7, 44.7, 26.5, 20.1; HRMS-ESI (*m/z*) [*M* + *H*]<sup>+</sup> calcd for C<sub>19</sub>H<sub>17</sub>N<sub>3</sub>O<sub>2</sub>: 320.1394; Found, 320.1395.

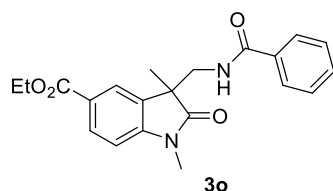

**ethyl-3-(Benzamidomethyl)-1,3-dimethyl-2-oxoindoline-5-carboxylate (3o):**

The resultant residue was purified by flash silica gel column chromatography to afford **3o** as white solid (53 mg, 72%); m.p. = 164–166 °C; <sup>1</sup>H NMR (CDCl<sub>3</sub>, 400 MHz) δ: 8.09 (dd, *J* = 1.6, 8.2 Hz, 1H), 8.01 (d, *J* = 1.2 Hz, 1H), 7.82–7.80 (m, 2H), 7.53–7.49 (m, 1H), 7.46–7.42 (m, 2H), 7.28–7.25 (m, 1H), 6.94 (d, *J* = 8.2 Hz, 1H), 4.41–4.28 (m, 3H), 3.28 (s, 3H), 3.24 (dd, *J* = 2.8, 13.6 Hz, 1H), 1.51 (s, 3H), 1.42 (t, *J* = 7.2 Hz,

3H);  $^{13}\text{C}$  NMR ( $\text{CDCl}_3$ , 100 MHz)  $\delta$ : 180.4, 167.4, 166.0, 146.7, 134.1, 131.8, 131.5, 131.2, 128.5, 126.9, 125.3, 124.2, 107.9, 60.9, 47.1, 44.8, 26.4, 19.9, 14.3; HRMS-ESI ( $m/z$ )  $[\text{M} + \text{H}]^+$  calcd for  $\text{C}_{21}\text{H}_{22}\text{N}_2\text{O}_4$ : 367.1652; Found, 367.1656.

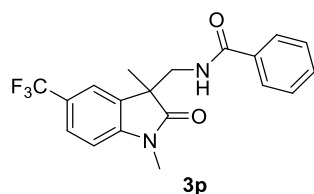

***N*-((1,3-Dimethyl-2-oxo-5-(trifluoromethyl)indolin-3-yl)methyl)benzamide (3p):**

The resultant residue was purified by flash silica gel column chromatography to afford **3p** as colorless solid (40 mg, 56%); m.p. = 126–128 °C;  $^1\text{H}$  NMR ( $\text{CDCl}_3$ , 600 MHz)  $\delta$ : 7.80–7.79 (m, 2H), 7.61–7.58 (m, 2H), 7.52–7.49 (m, 1H), 7.45–7.42 (m, 2H), 7.21 (d,  $J$  = 6.2 Hz, 1H), 6.96, (d,  $J$  = 8.2 Hz, 1H), 4.25 (dd,  $J$  = 8.4, 13.6 Hz, 1H), 3.30–2.74 (m, 4H), 1.50 (s, 3H);  $^{19}\text{F}$  NMR ( $\text{CDCl}_3$ , 376 MHz)  $\delta$ : 61.5;  $^{13}\text{C}$  NMR ( $\text{CDCl}_3$ , 150 MHz)  $\delta$ : 180.1, 167.5, 145.8, 134.2, 132.6, 131.6, 128.6, 127.2, 126.9, 126.3 (q,  $J$  = 4.4 Hz, 1C), 125.4, (q,  $J$  = 32 Hz, 1C), 124.2 (q,  $J$  = 270 Hz, 1C), 120.2 (q,  $J$  = 3.4 Hz, 1C), 108.2, 47.4, 44.8, 26.4, 20.0; HRMS-ESI ( $m/z$ )  $[\text{M} + \text{H}]^+$  calcd for  $\text{C}_{19}\text{H}_{17}\text{F}_3\text{N}_2\text{O}_2$ : 363.1315; Found, 363.1317.

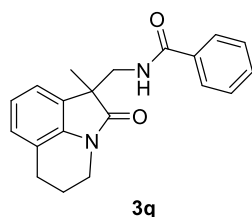

***N*-((1-Methyl-2-oxo-1,2,5,6-tetrahydro-4H-pyrrolo[3,2,1-ij]quinolin-1-yl)methyl)benzamide (3q):**

The resultant residue was purified by flash silica gel column chromatography to afford **3q** as yellow oil (35 mg, 55%);  $^1\text{H}$  NMR ( $\text{CDCl}_3$ , 400 MHz)  $\delta$ : 7.83–7.81 (m, 2H), 7.51–7.39 (m, 4H), 7.14 (d,  $J$  = 7.2 Hz, 1H), 7.07 (d,  $J$  = 7.0 Hz, 1H), 7.00 (t,  $J$  = 7.4 Hz, 1H), 7.25 (dd,  $J$  = 8.4, 13.6 Hz, 1H), 3.74 (t,  $J$  = 5.8 Hz, 2H), 3.25 (dd,  $J$  = 2.7, 13.6 Hz, 1H), 2.81 (t,  $J$  = 6.0 Hz, 2H), 2.04 (p,  $J$  = 6.2 Hz, 2H), 1.48 (s, 3H);  $^{13}\text{C}$  NMR ( $\text{CDCl}_3$ , 100 MHz)  $\delta$ : 179.1, 167.4, 138.5, 134.3, 131.4, 130.6, 128.5, 127.3, 126.9, 122.6, 120.8, 120.5, 48.4, 45.1, 38.8, 24.4, 21.1, 20.0; HRMS-ESI ( $m/z$ )  $[\text{M} + \text{H}]^+$  calcd for  $\text{C}_{20}\text{H}_{20}\text{N}_2\text{O}_2$ : 321.1598; Found, 321.1602.

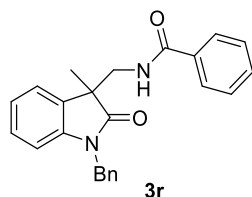

***N*-((1-Benzyl-3-methyl-2-oxoindolin-3-yl)methyl)benzamide (3r):** The resultant residue was purified by flash silica gel column chromatography to afford **3r** as

colorless oil (37 mg, 50%);  $^1\text{H}$  NMR ( $\text{CDCl}_3$ , 400 MHz)  $\delta$ : 7.73–7.71 (m, 2H), 7.54–7.47 (m, 2H), 7.38 (t,  $J = 7.2$  Hz, 2H), 7.26 (s, 5H), 7.20 (dt,  $J = 1.1, 7.7$  Hz, 2H), 7.11–7.07 (m, 1H), 6.79 (d,  $J = 7.7$  Hz, 1H), 4.94 (q,  $J = 20.0$  Hz, 2H), 4.27 (dd,  $J = 7.8, 13.6$  Hz, 1H), 3.46 (dd,  $J = 3.2, 13.6$  Hz, 1H), 1.52 (s, 3H);  $^{13}\text{C}$  NMR ( $\text{CDCl}_3$ , 100 MHz)  $\delta$ : 180.4, 167.5, 142.0, 135.6, 134.2, 131.9, 131.5, 128.9, 128.6, 128.5, 127.8, 127.2, 127.0, 123.2, 123.2, 109.4, 47.6, 45.2, 43.7, 20.6; HRMS-ESI ( $m/z$ ) [ $M + H$ ] $^+$  calcd for  $\text{C}_{24}\text{H}_{22}\text{N}_2\text{O}_2$ : 371.1754; Found, 371.1757.

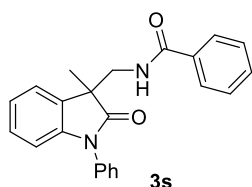

***N*-((3-Methyl-2-oxo-1-phenylindolin-3-yl)methyl)benzamide (3s):** The resultant residue was purified by flash silica gel column chromatography to afford **3s** as yellow oil (41 mg, 58%);  $^1\text{H}$  NMR ( $\text{CDCl}_3$ , 400 MHz)  $\delta$ : 7.83 (d,  $J = 7.2$  Hz, 2H), 7.55, (t,  $J = 7.8$  Hz, 2H), 7.49–7.40 (m, 8H), 7.28–7.24 (m, 1H), 7.17 (t,  $J = 7.2$  Hz, 1H), 6.88 (d,  $J = 7.6$  Hz, 1H), 4.37 (dd,  $J = 8.6, 13.6$  Hz, 1H), 3.39 (dd,  $J = 2.8, 13.6$  Hz, 1H), 1.60 (s, 3H);  $^{13}\text{C}$  NMR ( $\text{CDCl}_3$ , 100 MHz)  $\delta$ : 179.9, 167.5, 142.7, 134.2, 134.0, 131.8, 131.5, 129.7, 128.5, 128.4, 128.3, 127.0, 126.4, 123.6, 123.4, 109.7, 47.5, 45.3, 20.5; HRMS-ESI ( $m/z$ ) [ $M + H$ ] $^+$  calcd for  $\text{C}_{23}\text{H}_{20}\text{N}_2\text{O}_2$ : 357.1598; Found, 357.1601.

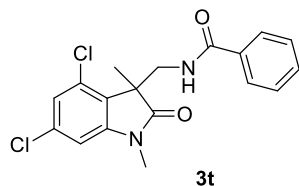

***N*-((4,6-Dichloro-1,3-dimethyl-2-oxoindolin-3-yl)methyl)benzamide (3t):** The resultant residue was purified by flash silica gel column chromatography to afford **3t** as colorless oil (30 mg, 42%);  $^1\text{H}$  NMR ( $\text{CDCl}_3$ , 400 MHz)  $\delta$ : 7.74–7.72 (m, 2H), 7.51–7.48 (m, 1H), 7.42 (t,  $J = 7.7$  Hz, 1H), 7.17 (d,  $J = 4.6$  Hz, 1H), 7.07 (d,  $J = 1.6$  Hz, 1H), 6.79 (d,  $J = 1.6$  Hz, 1H), 4.53 (dd,  $J = 8.0, 13.6$  Hz, 1H), 3.50 (dd,  $J = 3.5, 13.6$  Hz, 1H), 3.22 (s, 3H), 1.59 (s, 3H);  $^{13}\text{C}$  NMR ( $\text{CDCl}_3$ , 100 MHz)  $\delta$ : 179.6, 167.8, 145.5, 135.2, 131.8, 131.7, 128.6, 127.0, 126.5, 123.8, 107.9, 49.0, 42.8, 26.7, 17.6; HRMS-ESI ( $m/z$ ) [ $M + H$ ] $^+$  calcd for  $\text{C}_{18}\text{H}_{16}\text{Cl}_2\text{N}_2\text{O}_2$ : 363.0662; Found, 363.0664.

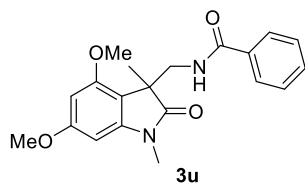

***N*-((4,6-Dimethoxy-1,3-dimethyl-2-oxoindolin-3-yl)methyl)benzamide (3u):** The resultant residue was purified by flash silica gel column chromatography to afford **3u**

as yellow oil (32 mg, 45%);  $^1\text{H}$  NMR ( $\text{CDCl}_3$ , 600 MHz)  $\delta$ : 7.81 (d,  $J = 5.0$  Hz, 2H), 7.49 (t,  $J = 4.8$  Hz, 1H), 7.43 (t,  $J = 5.2$  Hz, 3H), 6.21 (d,  $J = 1.1$  Hz, 1H), 6.13 (d,  $J = 1.1$  Hz, 1H), 4.30 (dd,  $J = 5.0, 13.6$  Hz, 1H), 3.86 (s, 3H), 3.84 (s, 3H), 3.36 (dd,  $J = 2.0, 13.6$  Hz, 1H), 3.21 (s, 3H), 1.50 (s, 3H);  $^{13}\text{C}$  NMR ( $\text{CDCl}_3$ , 150 MHz)  $\delta$ : 180.9, 167.4, 161.9, 157.0, 144.9, 134.7, 131.3, 128.5, 127.0, 109.8, 92.6, 88.7, 55.7, 55.5, 47.2, 44.2, 26.4, 18.3; HRMS-ESI ( $m/z$ ) [ $M + H$ ] $^+$  calcd for  $\text{C}_{20}\text{H}_{22}\text{N}_2\text{O}_4$ : 355.1652; Found, 355.1656.

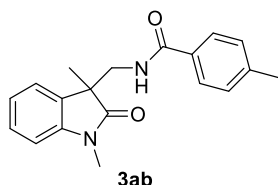

***N*-((1,3-Dimethyl-2-oxoindolin-3-yl)methyl)-4-methylbenzamide (3ab):** The resultant residue was purified by flash silica gel column chromatography to afford **3ab** as colorless solid (43 mg, 70%); m.p. = 122–124 °C;  $^1\text{H}$  NMR ( $\text{CDCl}_3$ , 400 MHz)  $\delta$ : 7.71 (d,  $J = 8.1$  Hz, 2H), 7.34–7.29 (m, 3H), 7.23 (d,  $J = 8.0$  Hz, 2H), 7.15–7.11 (m, 1H), 6.89 (d,  $J = 7.7$  Hz, 1H), 4.24 (dd,  $J = 8.4, 13.6$  Hz, 1H), 3.25–3.21 (m, 4H), 2.39 (s, 3H), 1.46 (s, 3H);  $^{13}\text{C}$  NMR ( $\text{CDCl}_3$ , 100 MHz)  $\delta$ : 180.3, 167.4, 142.7, 141.9, 132.0, 131.4, 129.2, 128.5, 126.9, 123.1, 123.0, 128.3, 47.2, 45.0, 26.2, 21.4, 20.1; HRMS-ESI ( $m/z$ ) [ $M + H$ ] $^+$  calcd for  $\text{C}_{19}\text{H}_{20}\text{N}_2\text{O}_2$ : 309.1598; Found, 309.1599.

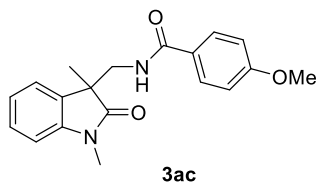

***N*-((1,3-Dimethyl-2-oxoindolin-3-yl)methyl)-4-methoxybenzamide (3ac):** The resultant residue was purified by flash silica gel column chromatography to afford **3ac** as colorless oil (40 mg, 62%);  $^1\text{H}$  NMR ( $\text{CDCl}_3$ , 400 MHz)  $\delta$ : 7.80–7.77 (m, 2H), 7.34–7.30 (m, 2H), 7.25 (d,  $J = 10.6$  Hz, 1H), 7.14–7.10 (m, 1H), 6.94–6.88 (m, 3H), 4.24 (dd,  $J = 8.4, 13.6$  Hz, 1H), 3.84 (s, 3H), 3.25 (s, 3H), 3.22 (dd,  $J = 2.8, 13.6$  Hz, 1H), 1.46 (s, 3H);  $^{13}\text{C}$  NMR ( $\text{CDCl}_3$ , 100 MHz)  $\delta$ : 180.3, 167.0, 162.1, 142.8, 132.1, 128.7, 128.4, 126.6, 123.1, 123.0, 113.7, 108.3, 55.3, 47.2, 45.0, 26.2, 20.1; HRMS-ESI ( $m/z$ ) [ $M + H$ ] $^+$  calcd for  $\text{C}_{19}\text{H}_{20}\text{N}_2\text{O}_3$ : 325.1547; Found, 325.1548.

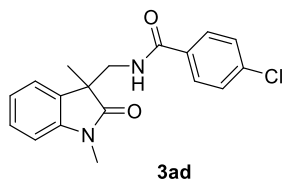

**4-Chloro-*N*-((1,3-dimethyl-2-oxoindolin-3-yl)methyl)benzamide (3ad):** The resultant residue was purified by flash silica gel column chromatography to afford

**3ad** as yellow oil (34 mg, 52%);  $^1\text{H}$  NMR ( $\text{CDCl}_3$ , 400 MHz)  $\delta$ : 7.76 (d,  $J = 8.5$  Hz, 2H), 7.41 (d,  $J = 8.2$  Hz, 3H), 7.33 (t,  $J = 7.7$  Hz, 2H), 7.13 (t,  $J = 7.6$  Hz, 1H), 6.90 (d,  $J = 7.7$  Hz, 1H), 4.24 (dd,  $J = 8.5, 13.6$  Hz, 1H), 3.26 (s, 3H), 3.21 (dd,  $J = 2.6, 13.6$  Hz, 1H), 1.46 (s, 3H);  $^{13}\text{C}$  NMR ( $\text{CDCl}_3$ , 100 MHz)  $\delta$ : 180.3, 166.4, 142.8, 137.8, 132.7, 132.0, 128.9, 128.6, 128.5, 123.3, 123.0, 108.5, 47.1, 45.2, 26.3, 20.3; HRMS-ESI ( $m/z$ ) [ $\text{M} + \text{H}$ ] $^+$  calcd for  $\text{C}_{18}\text{H}_{17}\text{ClN}_2\text{O}_2$ : 329.1051; Found, 329.1055.

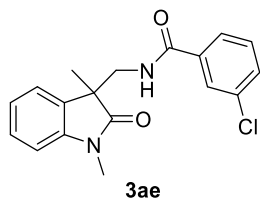

**3-Chloro-*N*-((1,3-dimethyl-2-oxoindolin-3-yl)methyl)benzamide (3ae):** The resultant residue was purified by flash silica gel column chromatography to afford **3ae** as white solid (40 mg, 61%); m.p. = 98–100 °C;  $^1\text{H}$  NMR ( $\text{CDCl}_3$ , 600 MHz)  $\delta$ : 7.79 (t,  $J = 0.8$  Hz, 1H), 7.66 (d,  $J = 5.2$  Hz, 1H), 7.47–7.45 (m, 1H), 7.38–7.35 (m, 2H), 7.34–7.31 (m, 2H), 7.13 (t,  $J = 3.2$  Hz, 1H), 6.90 (d,  $J = 3.2$  Hz, 1H), 4.22 (dd,  $J = 3.3, 13.6$  Hz, 1H), 3.26–3.24 (m, 4H), 1.47 (s, 3H);  $^{13}\text{C}$  NMR ( $\text{CDCl}_3$ , 150 MHz)  $\delta$ : 180.2, 166.2, 142.8, 136.1, 134.8, 131.9, 131.6, 129.9, 128.6, 127.5, 124.9, 123.3, 123.1, 108.5, 47.2, 45.2, 26.3, 20.3; HRMS-ESI ( $m/z$ ) [ $\text{M} + \text{H}$ ] $^+$  calcd for  $\text{C}_{18}\text{H}_{17}\text{ClN}_2\text{O}_2$ : 329.1051; Found, 329.1053.

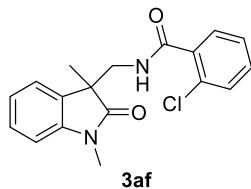

**2-Chloro-*N*-((1,3-dimethyl-2-oxoindolin-3-yl)methyl)benzamide (3af):** The resultant residue was purified by flash silica gel column chromatography to afford **3af** as yellow oil (42 mg, 64%);  $^1\text{H}$  NMR ( $\text{CDCl}_3$ , 400 MHz)  $\delta$ : 7.50 (dd,  $J = 0.6, 8.0$  Hz, 1H), 7.36–7.29 (m, 5H), 7.14–7.10 (m, 1H), 6.87 (d,  $J = 7.8$  Hz, 1H), 4.10 (dd,  $J = 7.4, 13.6$  Hz, 1H), 3.53 (dd,  $J = 4.4, 13.6$  Hz, 1H), 3.22 (s, 3H), 1.49 (s, 3H);  $^{13}\text{C}$  NMR ( $\text{CDCl}_3$ , 100 MHz)  $\delta$ : 179.8, 166.7, 143.1, 135.1, 131.7, 131.2, 130.6, 130.2, 129.9, 128.6, 127.0, 123.3, 123.1, 108.3, 47.8, 45.2, 26.3, 20.7; HRMS-ESI ( $m/z$ ) [ $\text{M} + \text{H}$ ] $^+$  calcd for  $\text{C}_{18}\text{H}_{17}\text{ClN}_2\text{O}_2$ : 329.1051; Found, 329.1054.

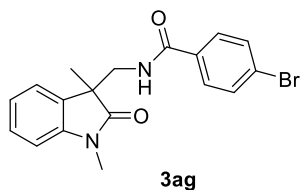

**4-Bromo-*N*-((1,3-dimethyl-2-oxoindolin-3-yl)methyl)benzamide (3ag):** The resultant residue was purified by flash silica gel column chromatography to afford **3ag**

as colorless oil (37 mg, 50%);  $^1\text{H}$  NMR ( $\text{CDCl}_3$ , 400 MHz)  $\delta$ : 7.69 (d,  $J = 8.6$  Hz, 2H), 7.57 (d,  $J = 8.6$  Hz, 2H), 7.41 (d,  $J = 8.6$  Hz, 1H), 7.35–7.31(m, 2H), 7.13 (t,  $J = 7.2$  Hz, 1H), 6.90 (d,  $J = 7.7$  Hz, 1H), 4.24 (dd,  $J = 8.4, 13.6$  Hz, 1H), 3.25 (s, 3H), 3.21 ( $J = 2.6, 13.6$  Hz, 1H), 1.46 (s, 3H);  $^{13}\text{C}$  NMR ( $\text{CDCl}_3$ , 100 MHz)  $\delta$ : 180.3, 166.5, 142.8, 133.1, 131.9, 131.8, 128.6, 126.2, 123.3, 123.0, 108.5, 47.1, 45.2, 26.3, 20.3; HRMS-ESI ( $m/z$ ) [ $\text{M} + \text{H}$ ] $^+$  calcd for  $\text{C}_{18}\text{H}_{17}\text{BrN}_2\text{O}_2$ : 373.0546; Found, 373.0548.

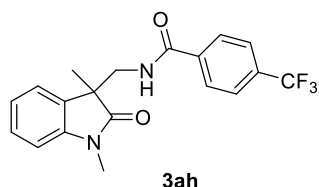

***N*-((1,3-Dimethyl-2-oxoindolin-3-yl)methyl)-4-(trifluoromethyl)benzamide (3ah):**

The resultant residue was purified by flash silica gel column chromatography to afford **3ah** as white solid (46 mg, 63%); m.p. = 61–63 °C;  $^1\text{H}$  NMR ( $\text{CDCl}_3$ , 400 MHz)  $\delta$ : 7.92 (d,  $J = 8.2$  Hz, 2H), 7.70 (d,  $J = 8.2$  Hz, 2H), 7.51 (d,  $J = 7.0$  Hz, 1H), 7.36–7.32 (m, 2H), 7.14 (t,  $J = 7.6$  Hz, 1H), 6.91 (d,  $J = 7.6$  Hz, 1H), 4.26 (dd,  $J = 8.4, 13.6$  Hz, 1H), 3.27–3.23 (m, 4H), 1.48 (s, 3H);  $^{19}\text{F}$  NMR ( $\text{CDCl}_3$ , 376 MHz)  $\delta$ : 62.9;  $^{13}\text{C}$  NMR ( $\text{CDCl}_3$ , 100 MHz)  $\delta$ : 180.2, 166.2, 142.7, 137.5, 133.4, 131.8, 128.7, 127.4, 125.6, (q,  $J = 3.7$  Hz, 1C), 122.6 (q,  $J = 270$  Hz, 1C), 123.2, 123.0, 108.5, 47.0, 45.2, 26.2, 20.2; HRMS-ESI ( $m/z$ ) [ $\text{M} + \text{H}$ ] $^+$  calcd for  $\text{C}_{19}\text{H}_{17}\text{F}_3\text{N}_2\text{O}_2$ : 363.1315; Found, 363.1317.

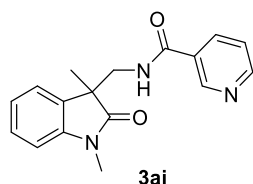

***N*-((1,3-Dimethyl-2-oxoindolin-3-yl)methyl)nicotinamide (3ai):** The resultant residue was purified by flash silica gel column chromatography to afford **3ai** as brown oil (28 mg, 48%);  $^1\text{H}$  NMR ( $\text{CDCl}_3$ , 400 MHz)  $\delta$ : 9.00 (s, 1H), 8.73 (d,  $J = 3.9$  Hz, 1H), 8.11 (td,  $J = 7.9, 1.9$  Hz, 1H), 7.43–7.32 (m, 4H), 7.6–7.12 (m, 1H), 6.92–6.90 (m, 1H), 4.24 (dd,  $J = 8.2, 13.6$  Hz, 1H), 2.9, 13.6 Hz, 1H), 3.26 (s, 3H), 1.48 (s, 3H);  $^{13}\text{C}$  NMR ( $\text{CDCl}_3$ , 100 MHz)  $\delta$ : 180.2, 165.7, 152.3, 148.3, 142.8, 134.9, 131.8, 129.9, 128.7, 123.4, 123.3, 123.1, 108.5, 47.1, 45.2, 26.3, 20.3; HRMS-ESI ( $m/z$ ) [ $\text{M} + \text{H}$ ] $^+$  calcd for  $\text{C}_{17}\text{H}_{17}\text{N}_3\text{O}_2$ : 296.1394; Found, 296.1396.

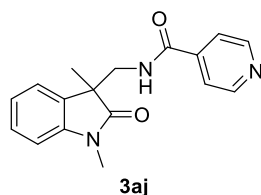

***N*-((1,3-Dimethyl-2-oxoindolin-3-yl)methyl)isonicotinamide (3aj):** The resultant

residue was purified by flash silica gel column chromatography to afford **3aj** as yellow oil (34 mg, 58%);  $^1\text{H}$  NMR ( $\text{CDCl}_3$ , 400 MHz)  $\delta$ : 8.74 (dd,  $J = 1.4, 4.5$  Hz, 2H), 7.66–7.63 (m, 3H), 7.37–7.32 (m, 2H), 7.4 (dt,  $J = 0.8, 7.6$  Hz, 1H), 6.92 (d,  $J = 7.8$  Hz, 1H), 4.24 (dd,  $J = 8.4, 13.6$  Hz, 1H), 3.26–3.23 (m, 4H), 1.47 (s, 3H);  $^{13}\text{C}$  NMR ( $\text{CDCl}_3$ , 100 MHz)  $\delta$ : 180.2, 165.6, 150.6, 142.7, 141.3, 131.7, 128.7, 123.3, 123.0, 120.9, 108.6, 46.9, 45.2, 26.3, 20.3; HRMS-ESI ( $m/z$ ) [ $\text{M} + \text{H}$ ] $^+$  calcd for  $\text{C}_{17}\text{H}_{17}\text{N}_3\text{O}_2$ : 296.1394; Found, 296.1390.

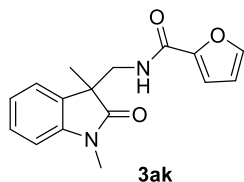

***N*-((1,3-Dimethyl-2-oxoindolin-3-yl)methyl)furan-2-carboxamide (3ak)**: The resultant residue was purified by flash silica gel column chromatography to afford **3ak** as yellow oil (18 mg, 31%);  $^1\text{H}$  NMR ( $\text{CDCl}_3$ , 400 MHz)  $\delta$ : 7.46 (t,  $J = 0.9$  Hz, 1H), 7.33–7.27 (m, 3H), 7.14–7.09 (m, 2H), 6.88 (d,  $J = 8.2$  Hz, 1H), 6.48 (q,  $J = 1.7$  Hz, 1H), 4.11 (dd,  $J = 8.2, 13.6$  Hz, 1H), 3.32 (dd,  $J = 3.6, 13.6$  Hz, 1H), 3.25 (s, 3H), 1.45 (s, 3H);  $^{13}\text{C}$  NMR ( $\text{CDCl}_3$ , 100 MHz)  $\delta$ : 179.9, 158.6, 147.8, 144.1, 142.9, 131.9, 128.5, 123.1, 114.3, 112.0, 108.4, 47.4, 44.3, 26.3, 20.2; HRMS-ESI ( $m/z$ ) [ $\text{M} + \text{H}$ ] $^+$  calcd for  $\text{C}_{16}\text{H}_{16}\text{N}_2\text{O}_3$ : 285.1234; Found, 285.1237.

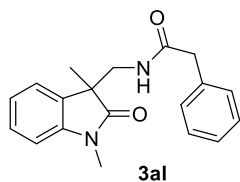

***N*-((1,3-Dimethyl-2-oxoindolin-3-yl)methyl)-2-phenylacetamide (3al)** : The resultant residue was purified by flash silica gel column chromatography to afford **3al** as colorless oil (14 mg, 23%);  $^1\text{H}$  NMR ( $\text{CDCl}_3$ , 400 MHz)  $\delta$ : 7.33–7.27 (m, 4H), 7.18 (d,  $J = 7.3$  Hz, 1H), 7.08–7.05 (m, 3H), 6.80 (d,  $J = 7.8$  Hz, 1H), 5.89 (s, 1H), 3.73 (dd,  $J = 6.8, 13.6$  Hz, 1H), 3.47 (d,  $J = 4.6$  Hz, 2H), 3.40 (dd,  $J = 5.2, 13.6$  Hz, 1H), 3.10 (s, 3H), 1.30 (s, 3H);  $^{13}\text{C}$  NMR ( $\text{CDCl}_3$ , 100 MHz)  $\delta$ : 179.5, 171.0, 142.9, 134.7, 131.6, 129.3, 129.0, 128.4, 127.4, 123.2, 123.0, 108.2, 47.9, 44.7, 43.8, 26.2, 20.2; HRMS-ESI ( $m/z$ ) [ $\text{M} + \text{H}$ ] $^+$  calcd for  $\text{C}_{19}\text{H}_{20}\text{N}_2\text{O}_2$ : 309.1598; Found, 309.1595.

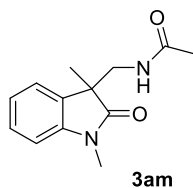

***N*-((1,3-Dimethyl-2-oxoindolin-3-yl)methyl)acetamide (3am)**: The resultant residue was purified by flash silica gel column chromatography to afford **3am** as yellow oil



(23 mg, 49%);  $^1\text{H}$  NMR ( $\text{CDCl}_3$ , 400 MHz)  $\delta$ : 7.33–7.26 (m, 2H), 7.10 (dt,  $J = 0.8$ , 7.6 Hz, 1H), 6.88 (d,  $J = 7.8$  Hz, 1H), 6.39 (d,  $J = 4.2$  Hz, 1H), 3.98 (dd,  $J = 8.1$ , 13.6 Hz, 1H), 3.23 (s, 3H), 3.12 (dd,  $J = 3.3$ , 13.6 Hz, 1H), 1.98 (s, 3H), 1.40 (s, 3H);  $^{13}\text{C}$  NMR ( $\text{CDCl}_3$ , 100 MHz)  $\delta$ : 180.1, 170.3, 142.8, 132.0, 128.5, 123.1, 123.1, 108.3, 47.2, 44.7, 26.2, 23.3, 20.2; HRMS-ESI ( $m/z$ ) [ $\text{M} + \text{H}$ ] $^+$  calcd for  $\text{C}_{13}\text{H}_{16}\text{N}_2\text{O}_2$ : 233.1285; Found, 233.1288.

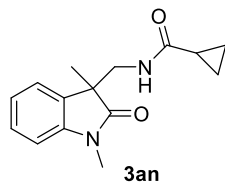

***N*-((1,3-Dimethyl-2-oxoindolin-3-yl)methyl)cyclopropanecarboxamide (3an)**: The resultant residue was purified by flash silica gel column chromatography to afford **3an** as white solid (18 mg, 34%); m.p. = 160–162 °C;  $^1\text{H}$  NMR ( $\text{CDCl}_3$ , 400 MHz)  $\delta$ : 7.33–7.25 (m, 2H), 7.09 (dt,  $J = 0.6$ , 7.6 Hz, 1H), 6.87 (d,  $J = 7.8$  Hz, 1H), 6.51 (d,  $J = 5.2$  Hz, 1H), 3.99 (dd,  $J = 8.2$ , 13.6 Hz, 1H), 3.24 (s, 3H), 3.14 (dd,  $J = 3.4$ , 13.6 Hz, 1H), 1.41–1.34 (m, 4H), 1.00–0.94 (m, 1H), 0.89–0.84 (m, 1H), 0.77–0.66 (m, 2H);  $^{13}\text{C}$  NMR ( $\text{CDCl}_3$ , 100 MHz)  $\delta$ : 180.2, 173.9, 142.9, 132.1, 128.4, 123.1, 123.0, 108.3, 47.4, 44.8, 26.3, 20.1, 14.8, 7.2, 7.1; HRMS-ESI ( $m/z$ ) [ $\text{M} + \text{H}$ ] $^+$  calcd for  $\text{C}_{15}\text{H}_{18}\text{N}_2\text{O}_2$ : 259.1441; Found, 259.1444.

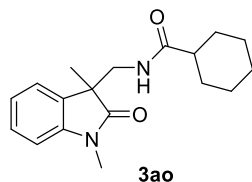

***N*-((1,3-Dimethyl-2-oxoindolin-3-yl)methyl)cyclohexanecarboxamide (3ao)**: The resultant residue was purified by flash silica gel column chromatography to afford **3ao** as yellow solid (23 mg, 38%); m.p. = 60–62 °C;  $^1\text{H}$  NMR ( $\text{CDCl}_3$ , 400 MHz)  $\delta$ : 7.32–7.26 (m, 2H), 7.10 (dt,  $J = 0.7$ , 7.6 Hz, 1H), 6.87 (d,  $J = 7.7$  Hz, 1H), 6.37 (d,  $J = 4.4$  Hz, 1H), 3.95 (dd,  $J = 8.0$ , 13.6 Hz, 1H), 3.23 (s, 3H), 3.15 (dd,  $J = 3.6$ , 13.6 Hz, 1H), 2.07 (tt,  $J = 3.0$ , 11.3 Hz, 1H), 1.86–1.63 (m, 5H), 1.41–1.20 (m, 8H);  $^{13}\text{C}$  NMR ( $\text{CDCl}_3$ , 100 MHz)  $\delta$ : 180.2, 176.2, 142.8, 132.0, 128.4, 123.1, 123.0, 108.2, 47.5, 45.5, 44.2, 29.6, 29.5, 26.2, 25.7, 25.6, 20.0; HRMS-ESI ( $m/z$ ) [ $\text{M} + \text{H}$ ] $^+$  calcd for  $\text{C}_{18}\text{H}_{24}\text{N}_2\text{O}_2$ : 309.1911; Found, 309.1913.

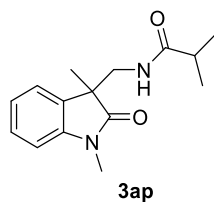

***N*-((1,3-Dimethyl-2-oxoindolin-3-yl)methyl)isobutyramide (3ap)**: The resultant

residue was purified by flash silica gel column chromatography to afford **3ap** as colorless oil (16 mg, 32%);  $^1\text{H}$  NMR ( $\text{CDCl}_3$ , 400 MHz)  $\delta$ : 7.32–7.27 (m, 2H), 7.10 (t,  $J = 7.6$  Hz, 1H), 6.86 (d,  $J = 7.7$  Hz, 1H), 6.31 (s, 1H), 3.92 (dd,  $J = 7.8, 13.6$  Hz, 1H), 3.24–3.20 (m, 4H), 2.33 (p,  $J = 6.9$  Hz, 1H), 1.39 (s, 3H), 1.12 (d,  $J = 6.9$  Hz, 3H), 1.03 (dd,  $J = 6.9$  Hz, 3H);  $^{13}\text{C}$  NMR ( $\text{CDCl}_3$ , 100 MHz)  $\delta$ : 180.2, 177.1, 142.9, 132.0, 128.4, 123.2, 123.1, 108.2, 47.7, 44.3, 35.7, 26.2, 20.1, 19.5, 19.5; HRMS-ESI ( $m/z$ )  $[\text{M} + \text{H}]^+$  calcd for  $\text{C}_{15}\text{H}_{20}\text{N}_2\text{O}_2$ : 261.1598; Found, 261.1597.

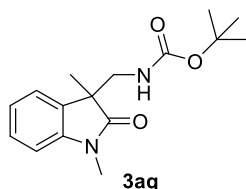

**tert-Butyl ((1,3-dimethyl-2-oxoindolin-3-yl)methyl)carbamate (3aq):** The resultant residue was purified by flash silica gel column chromatography to afford **3aq** as colorless oil (34 mg, 59%);  $^1\text{H}$  NMR ( $\text{CDCl}_3$ , 400 MHz)  $\delta$ : 7.31–7.25 (m, 2H), 7.08 (dt,  $J = 0.8, 7.6$  Hz, 1H), 6.85 (d,  $J = 7.8$  Hz, 1H), 5.10 (s, 1H), 3.64 (dd,  $J = 7.8, 13.6$  Hz, 1H), 3.27–3.22 (m, 4H), 1.38 (d,  $J = 7.6$  Hz, 12H);  $^{13}\text{C}$  NMR ( $\text{CDCl}_3$ , 100 MHz)  $\delta$ : 179.7, 155.9, 143.1, 131.9, 128.2, 123.1, 122.7, 108.0, 79.2, 48.1, 46.2, 28.2, 26.2, 19.9; HRMS-ESI ( $m/z$ )  $[\text{M} + \text{H}]^+$  calcd for  $\text{C}_{16}\text{H}_{22}\text{N}_2\text{O}_3$ : 291.1703; Found, 291.1705.

## 10. References.

1. X. Liu, X. Ma, Y. Huang and Z. Gu, *Org. Lett.*, 2013, **15**, 4814–4817.
2. A. Pinto, Y. Jia, L. Neuville and J. Zhu, *Chem. Eur. J.*, 2007, **13**, 961–967.
3. W. Guo, Q. Wang and J. Zhu, *Angew. Chem. Int. Ed.*, 2021, **60**, 4085–4089.

## 11. Copies of NMR spectra

**2a;**  $^1\text{H}$  NMR (400 Hz,  $\text{CDCl}_3$ );  $^{13}\text{C}$  NMR (100 Hz,  $\text{CDCl}_3$ )

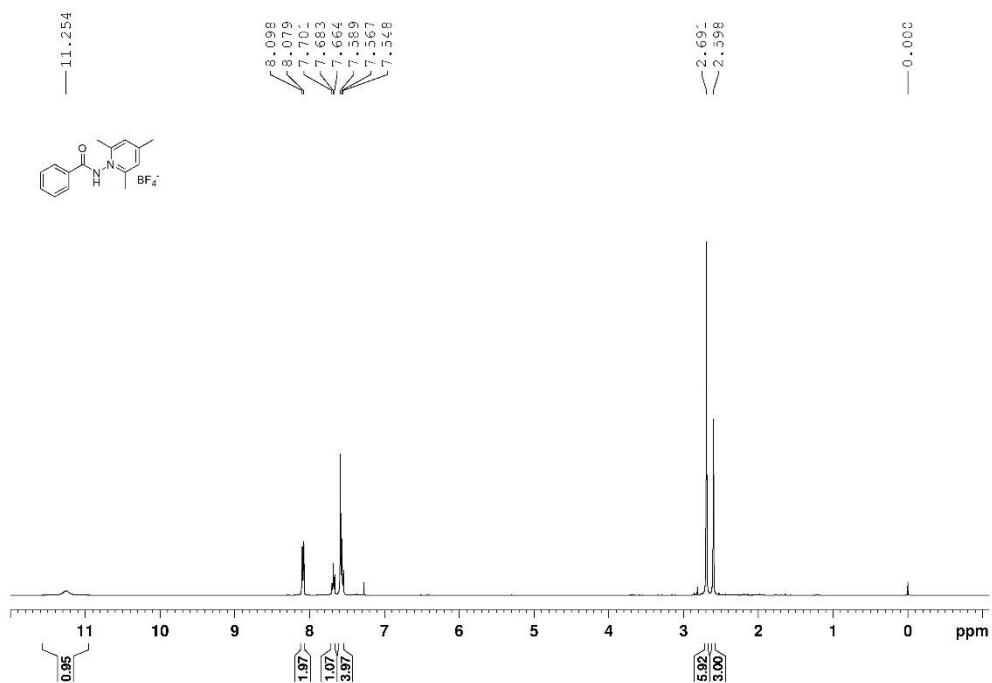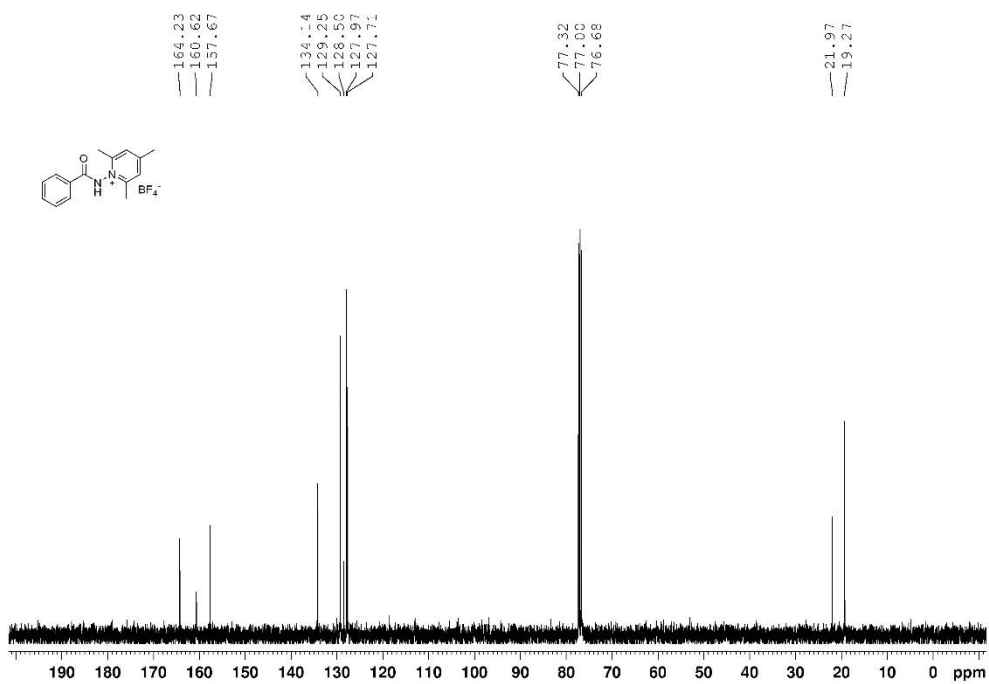

**2b**;  $^1\text{H}$  NMR (400 Hz,  $\text{CDCl}_3$ );  $^{13}\text{C}$  NMR (100 Hz,  $\text{CDCl}_3$ )

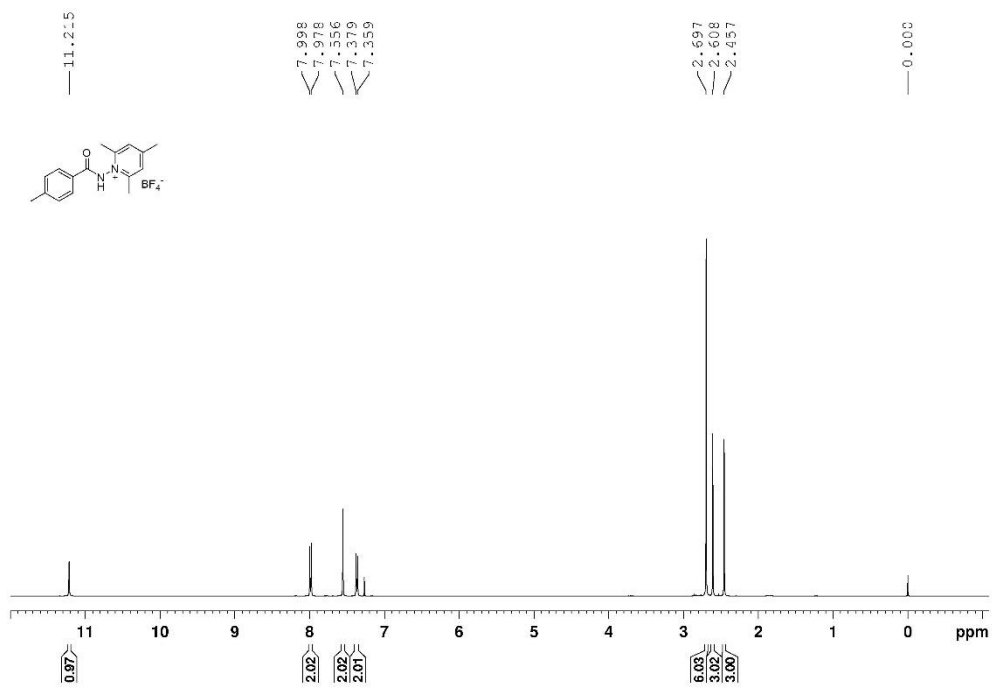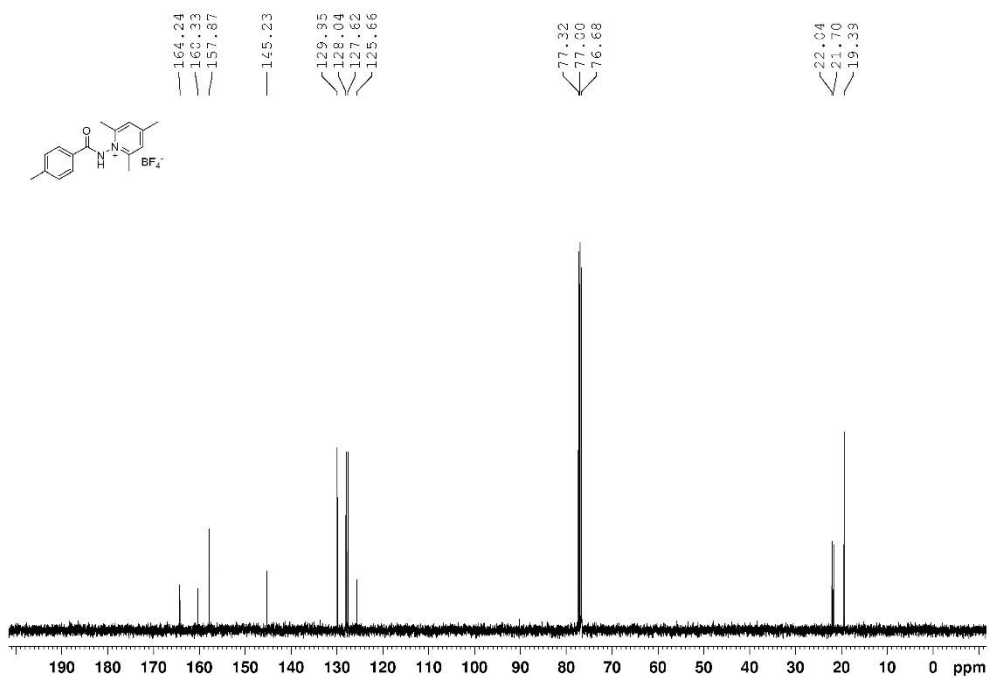

**2c**;  $^1\text{H}$  NMR (400 Hz,  $\text{CDCl}_3$ );  $^{13}\text{C}$  NMR (100 Hz,  $\text{CDCl}_3$ )

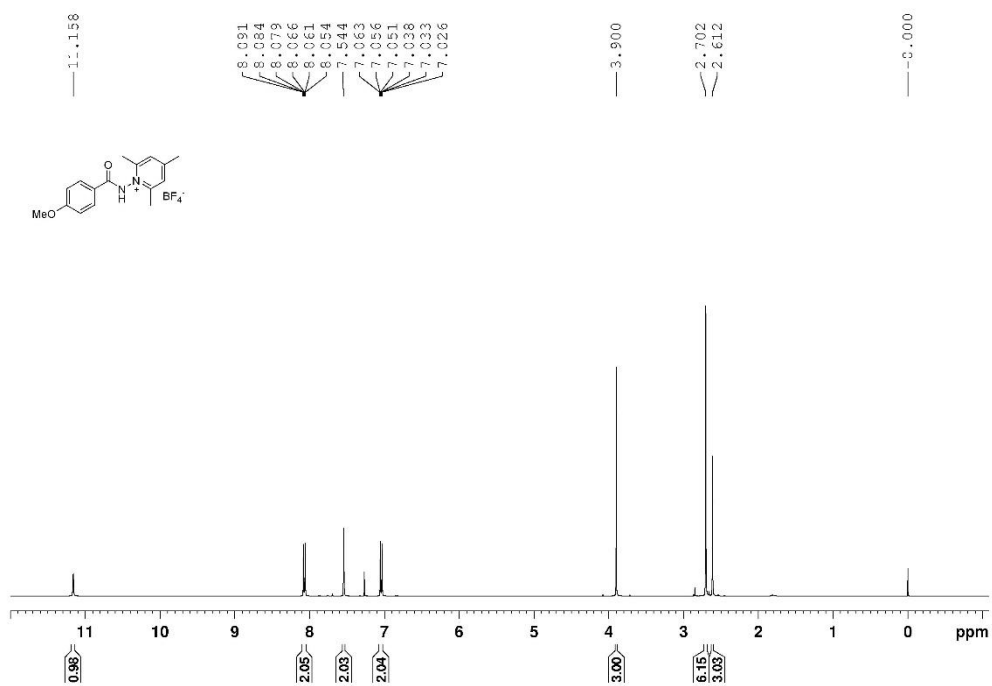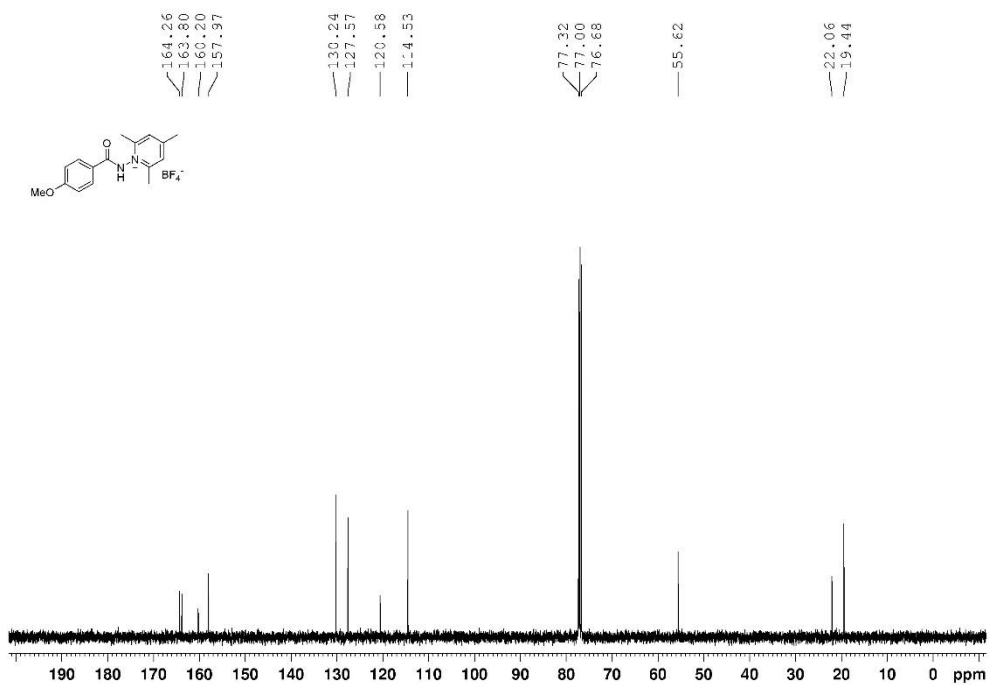

**2d**;  $^1\text{H}$  NMR (400 Hz,  $\text{CDCl}_3$ );  $^{13}\text{C}$  NMR (100 Hz,  $\text{CDCl}_3$ )

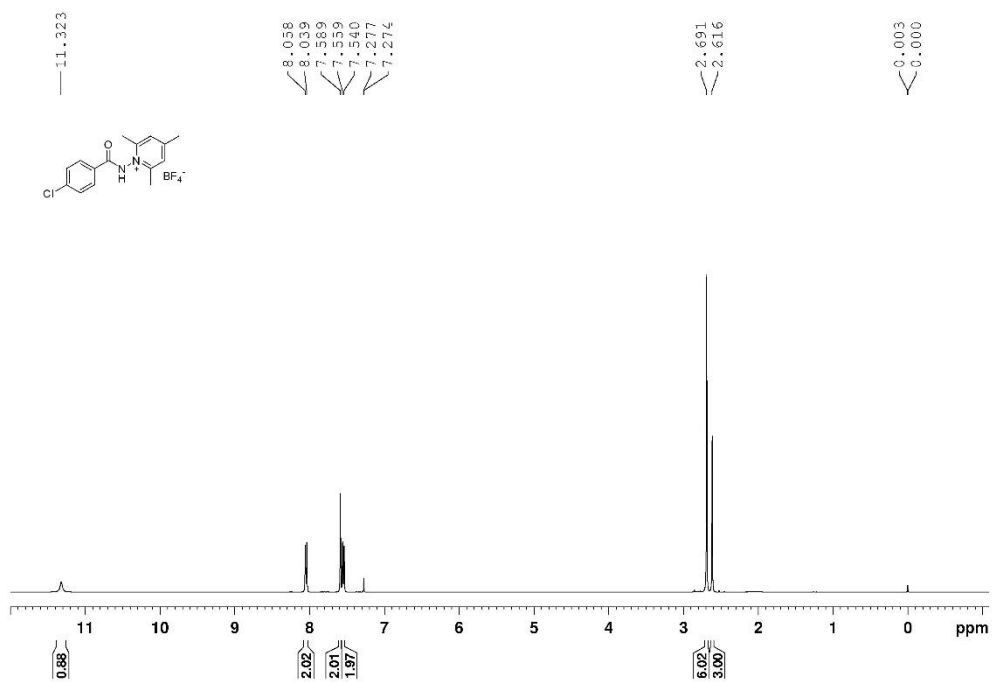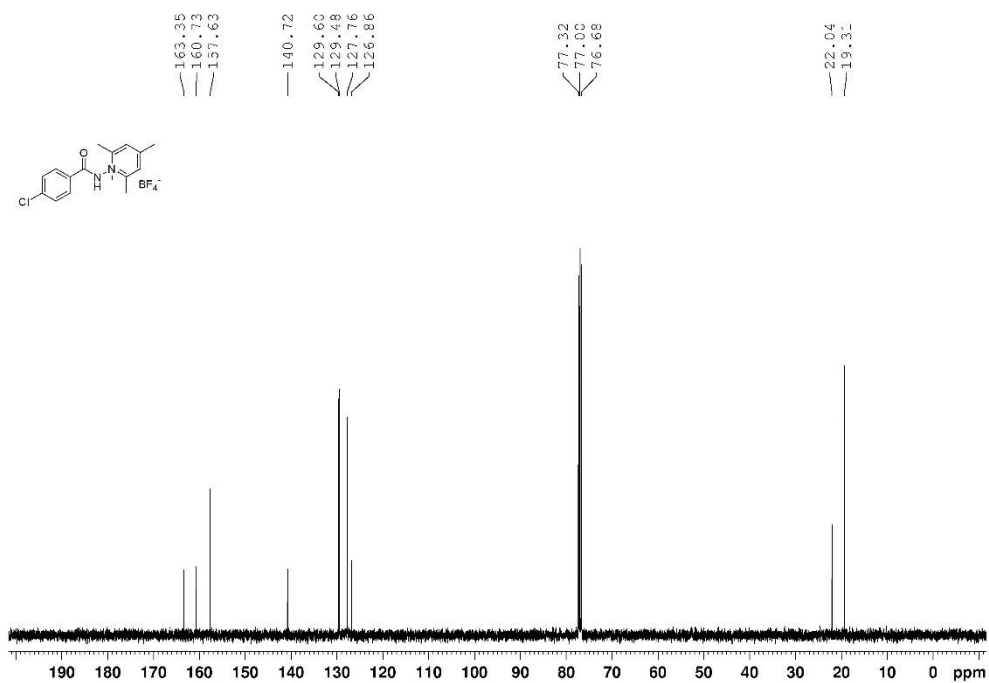

2e;  $^1\text{H}$  NMR (400 Hz,  $\text{CDCl}_3$ );  $^{13}\text{C}$  NMR (100 Hz,  $\text{CDCl}_3$ )

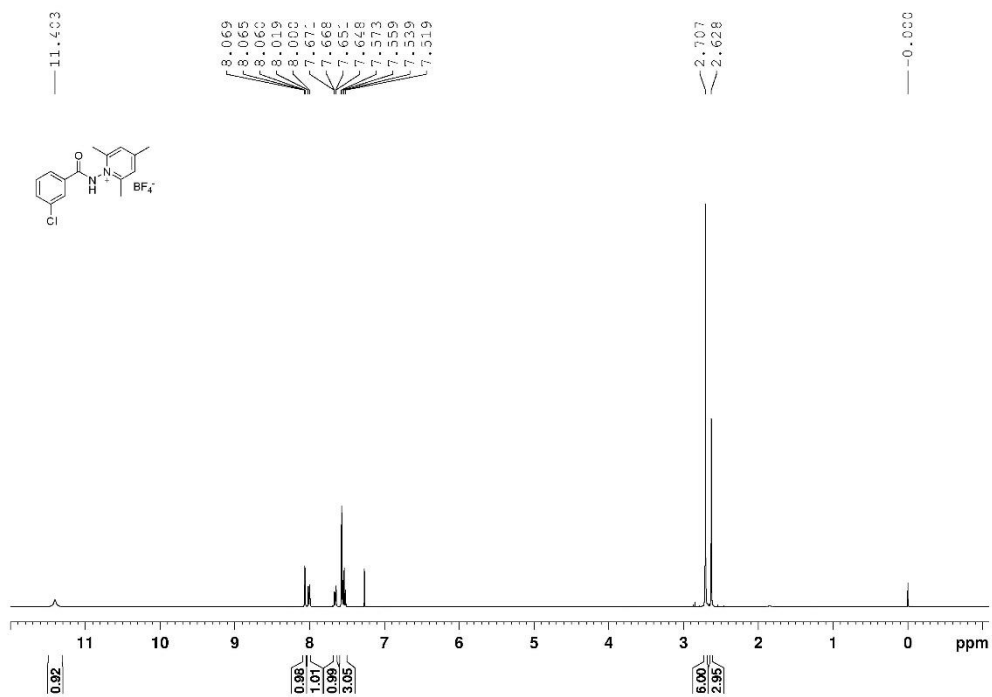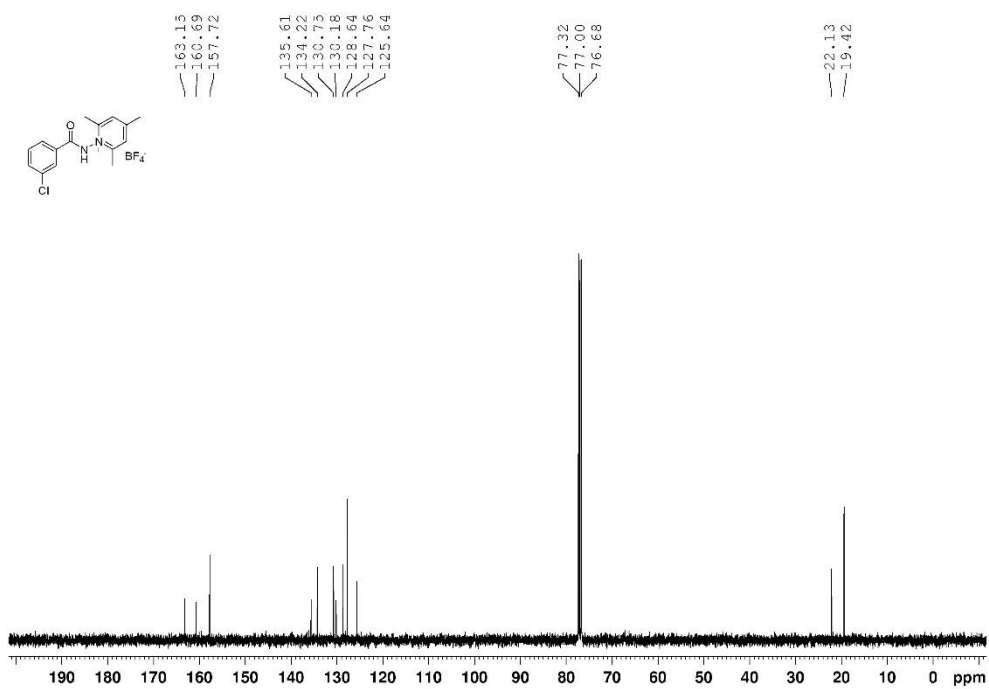

**2f**;  $^1\text{H}$  NMR (600 Hz,  $\text{CDCl}_3$ );  $^{13}\text{C}$  NMR (150 Hz,  $\text{CDCl}_3$ )

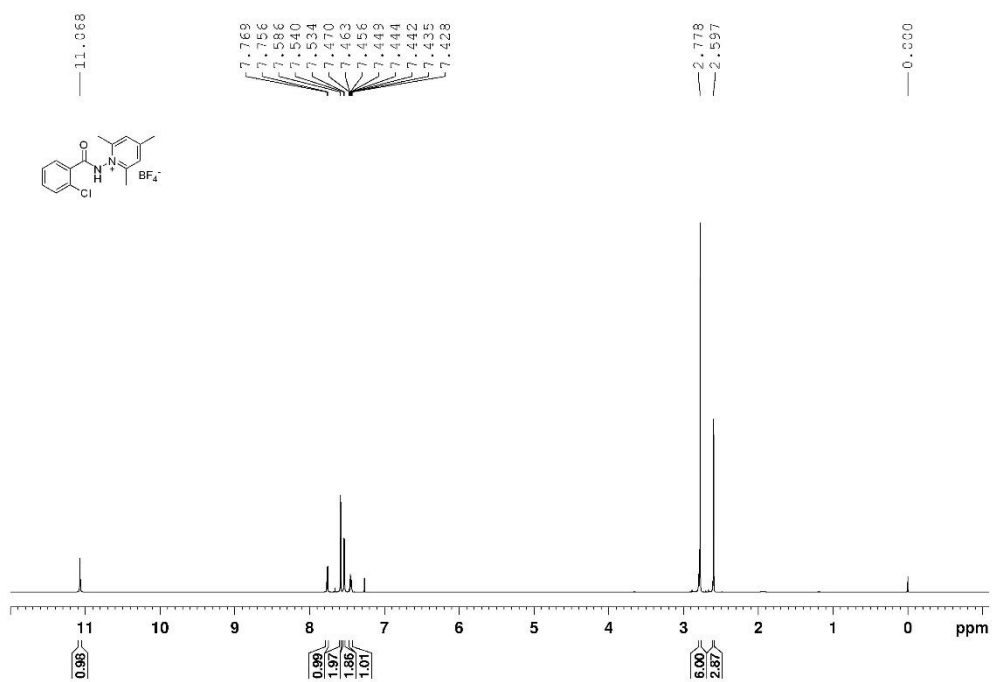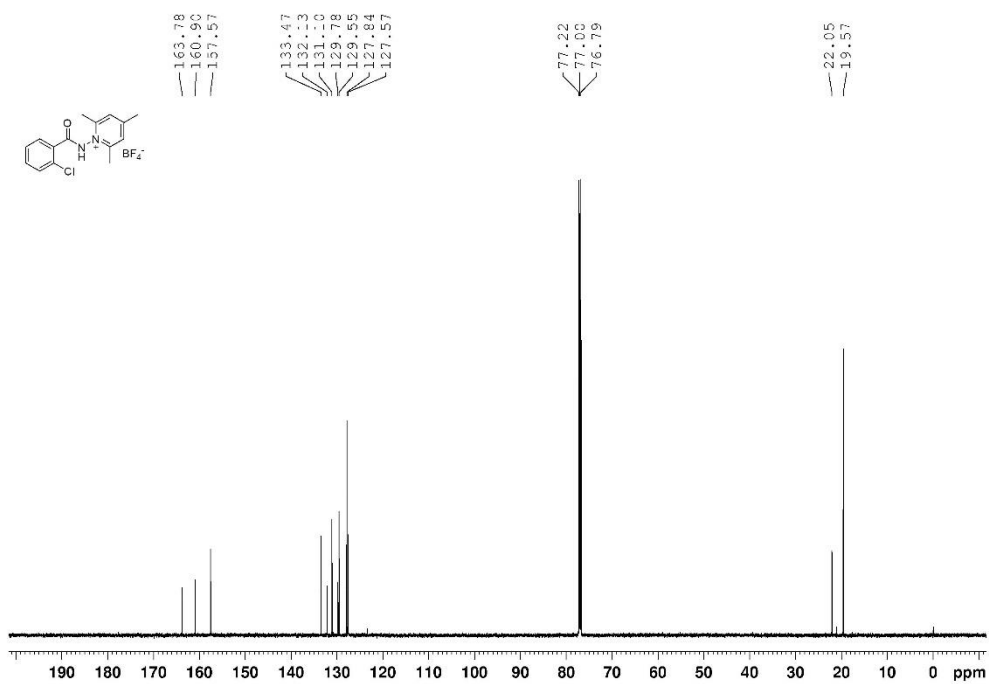



2g;  $^1\text{H}$  NMR (400 Hz,  $\text{CDCl}_3$ );  $^{13}\text{C}$  NMR (100 Hz,  $\text{CDCl}_3$ )

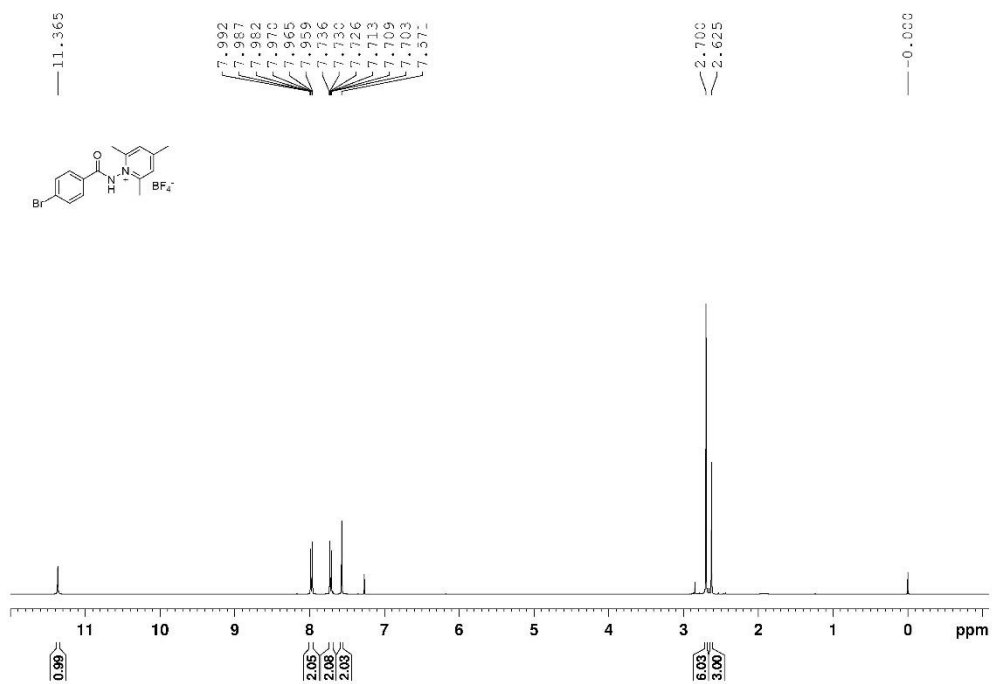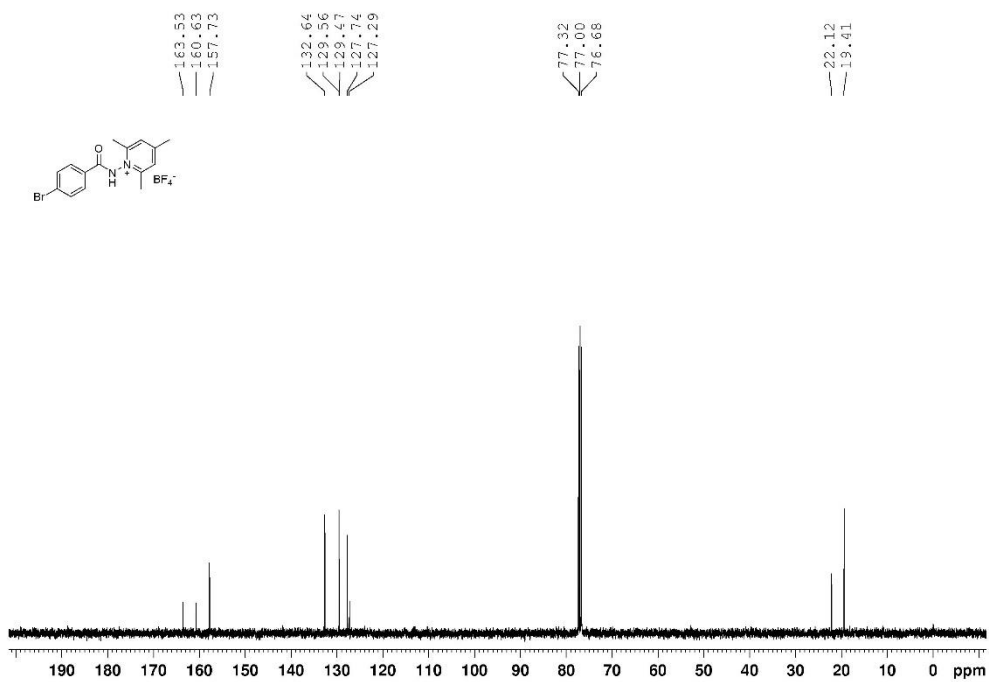

**2h**;  $^1\text{H}$  NMR (400 Hz,  $\text{CDCl}_3$ );  $^{13}\text{C}$  NMR (100 Hz,  $\text{CDCl}_3$ )

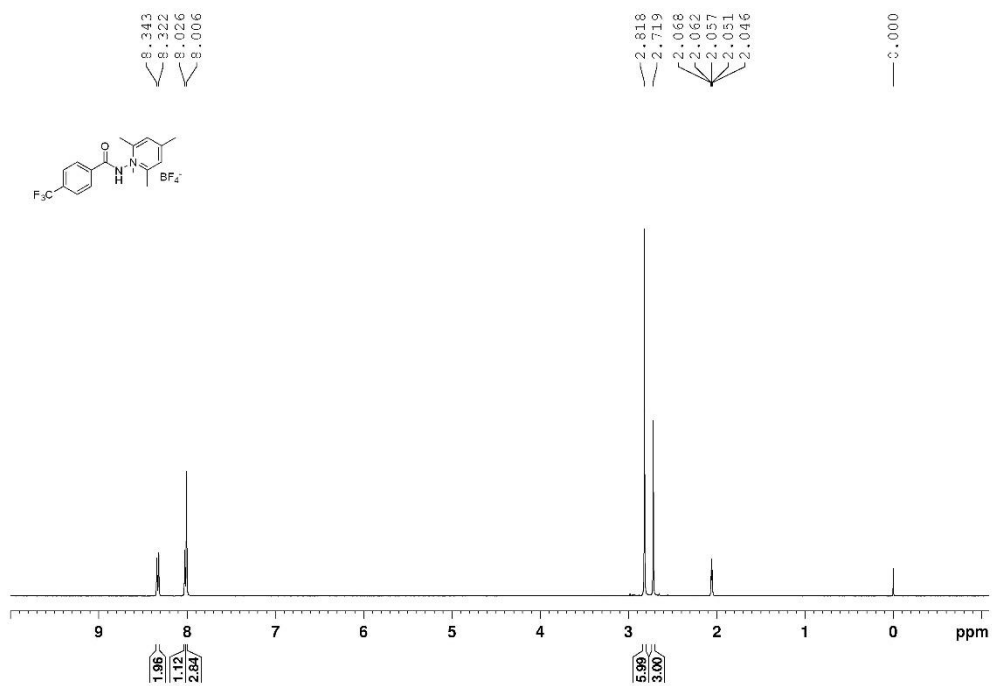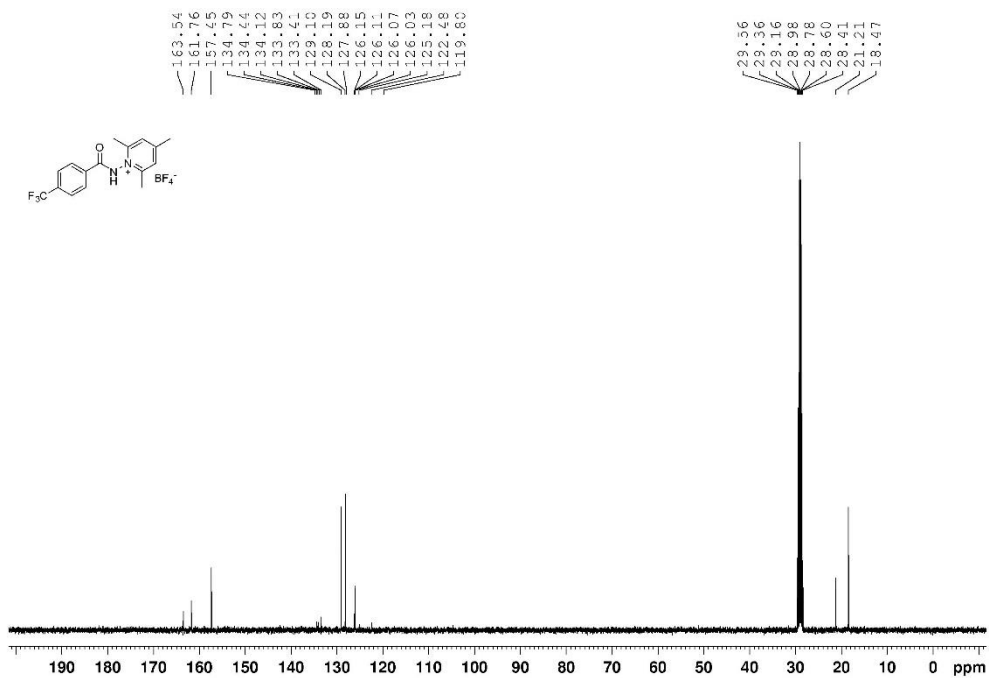

**2i**;  $^1\text{H}$  NMR (400 Hz,  $\text{D}_2\text{O}$ );  $^{13}\text{C}$  NMR (100 Hz,  $\text{D}_2\text{O}$ )

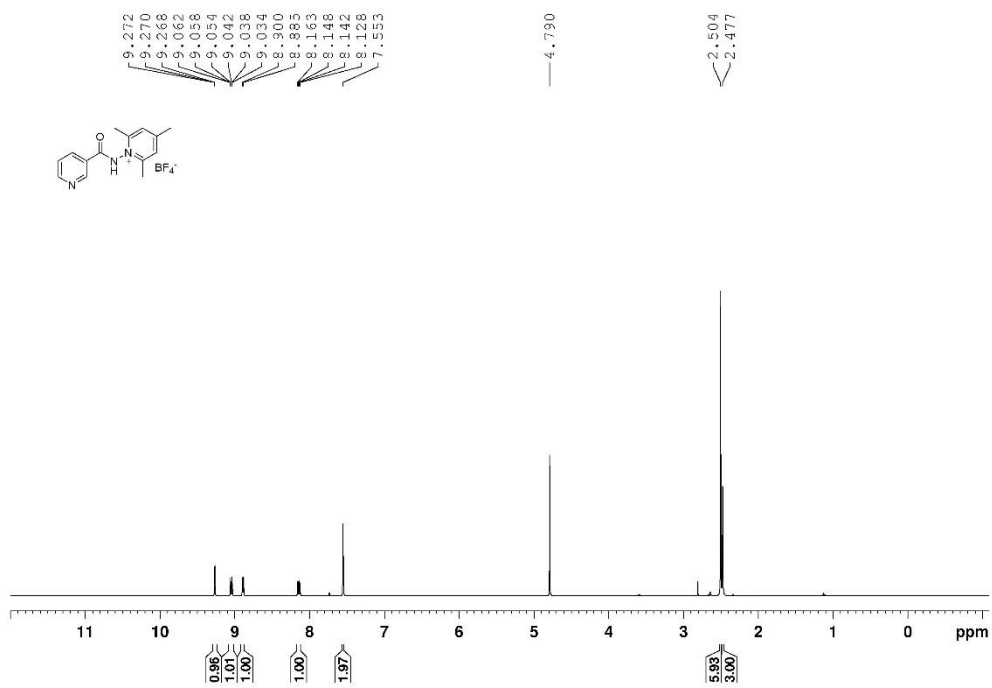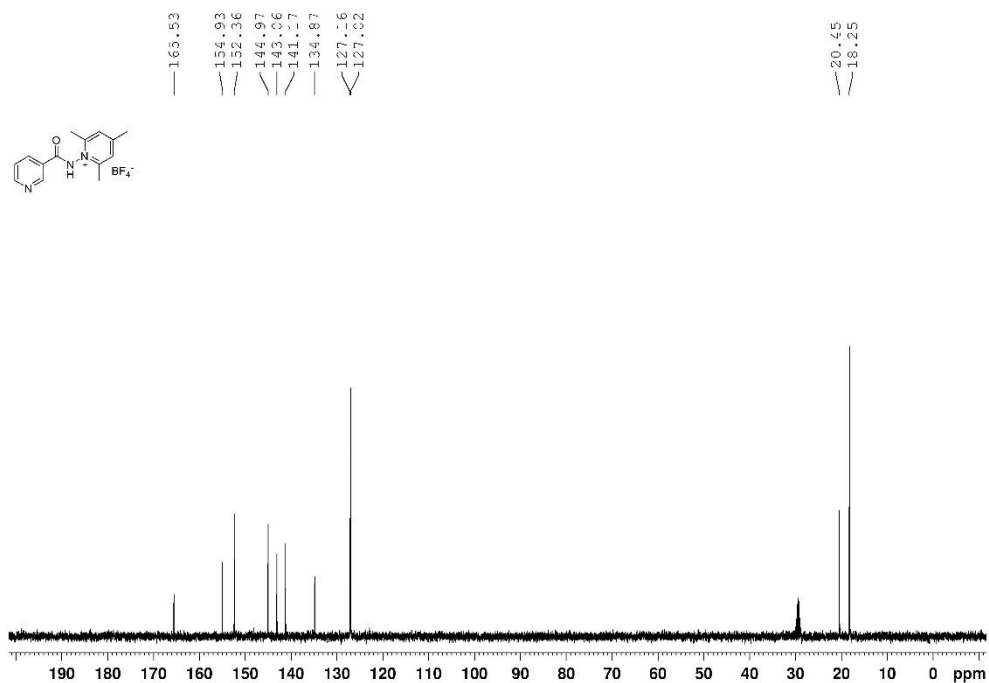

**2j**;  $^1\text{H}$  NMR (400 Hz,  $\text{D}_2\text{O}$ );  $^{13}\text{C}$  NMR (100 Hz,  $\text{D}_2\text{O}$ )

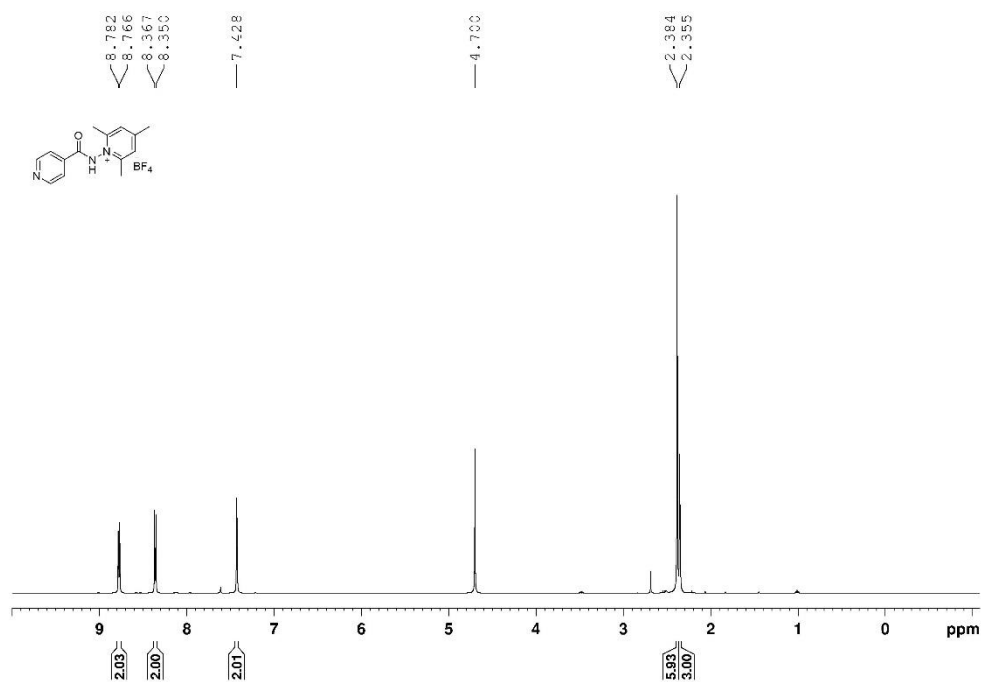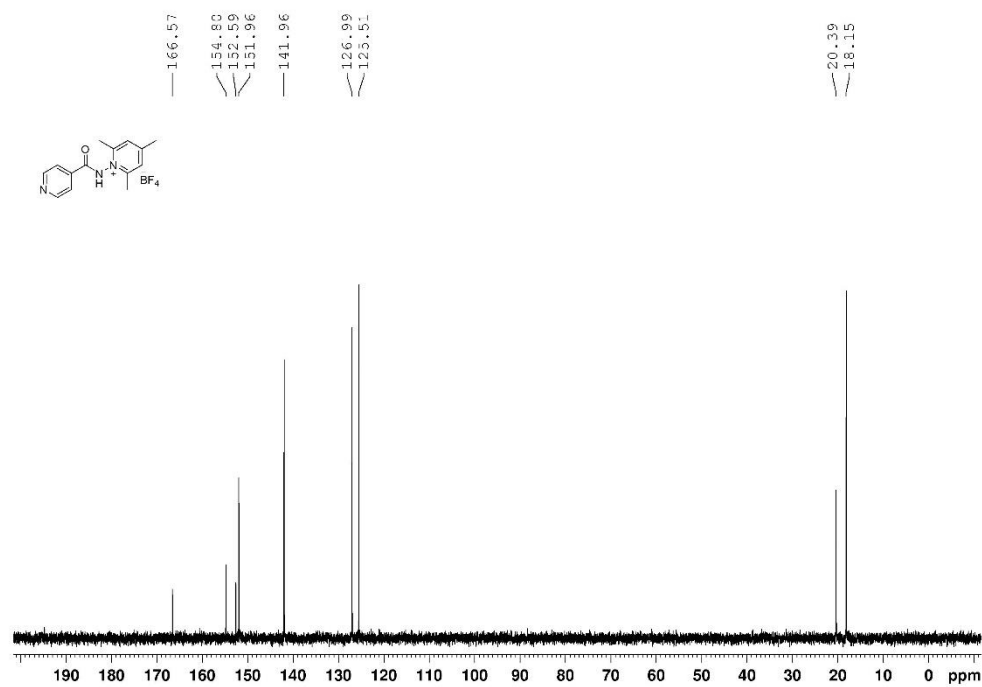

**2k**;  $^1\text{H}$  NMR (400 Hz,  $\text{CDCl}_3$ );  $^{13}\text{C}$  NMR (100 Hz,  $\text{CDCl}_3$ )

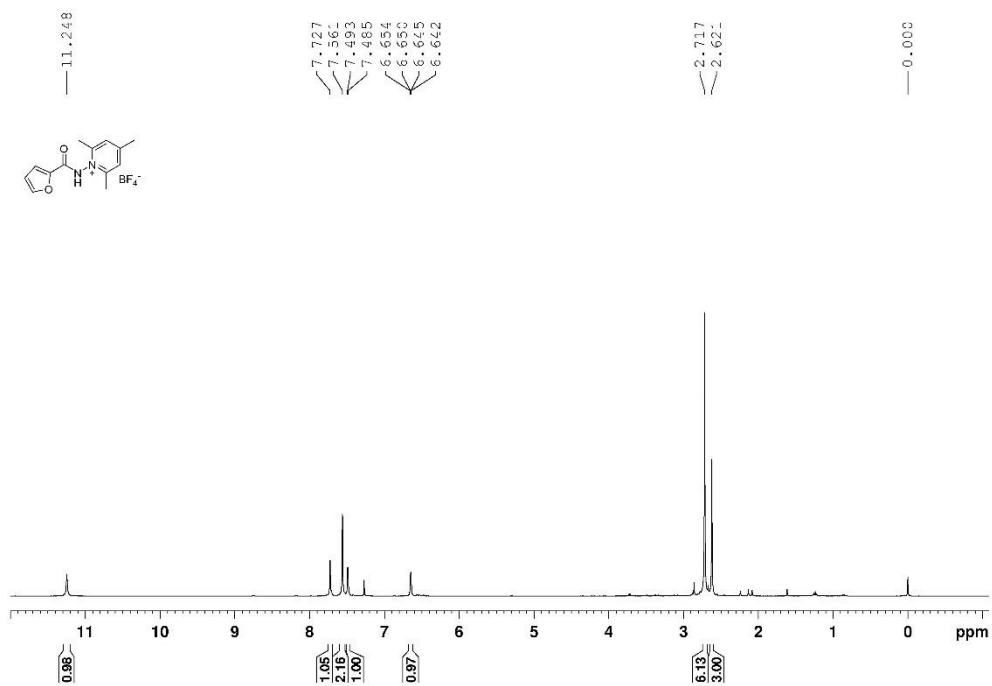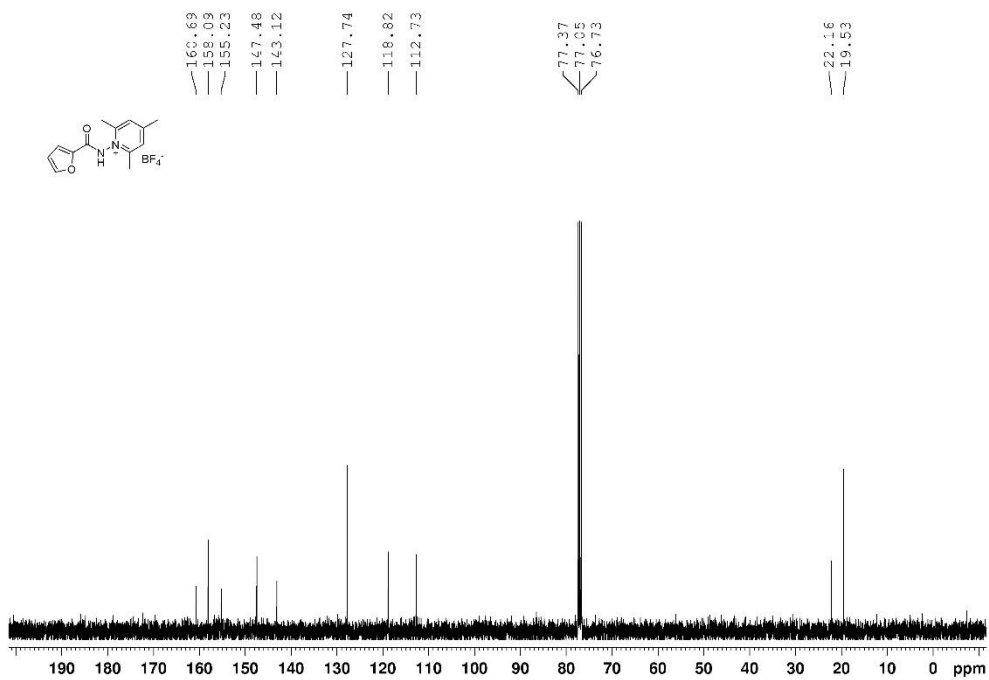

21;  $^1\text{H}$  NMR (400 Hz,  $(\text{CD}_3)_2\text{CO}$ );  $^{13}\text{C}$  NMR (100 Hz,  $(\text{CD}_3)_2\text{CO}$ )

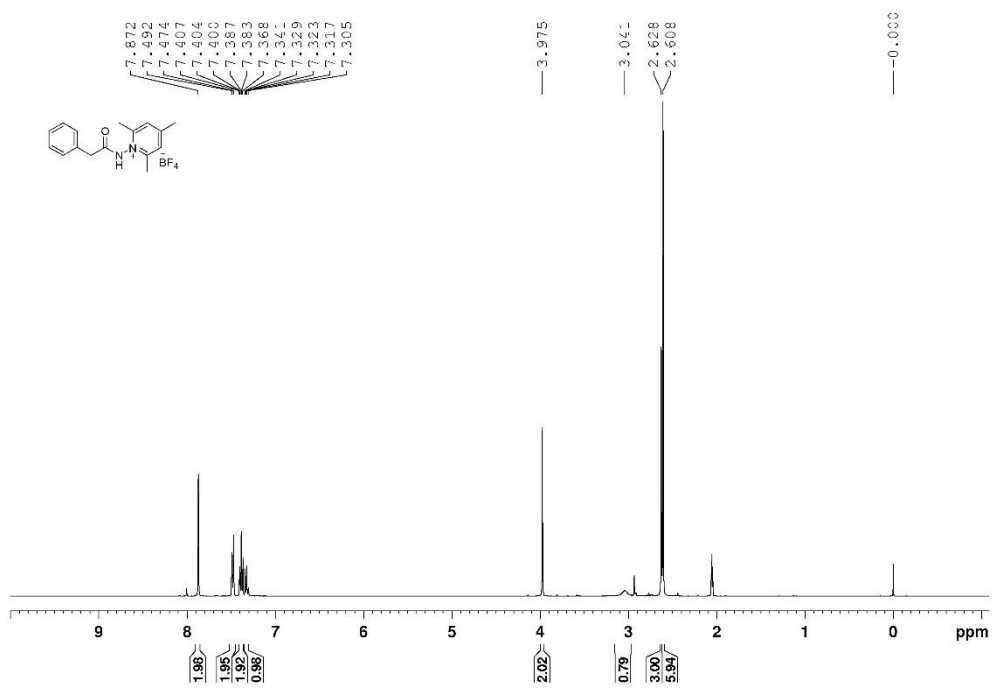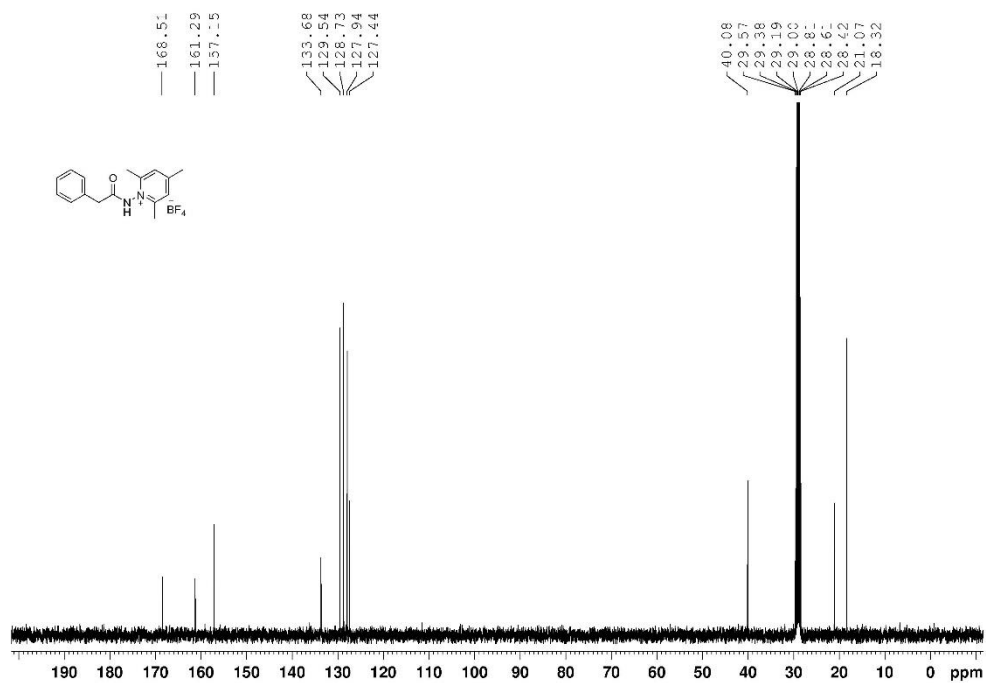

**2m**;  $^1\text{H}$  NMR (400 Hz,  $(\text{CD}_3)_2\text{CO}$ );  $^{13}\text{C}$  NMR (100 Hz,  $(\text{CD}_3)_2\text{CO}$ )

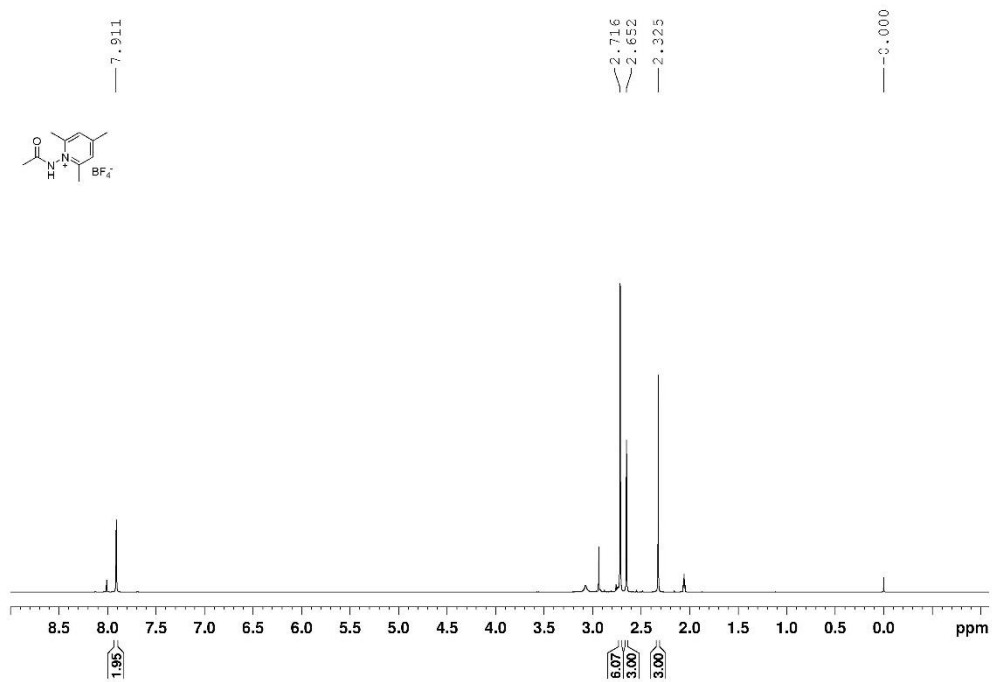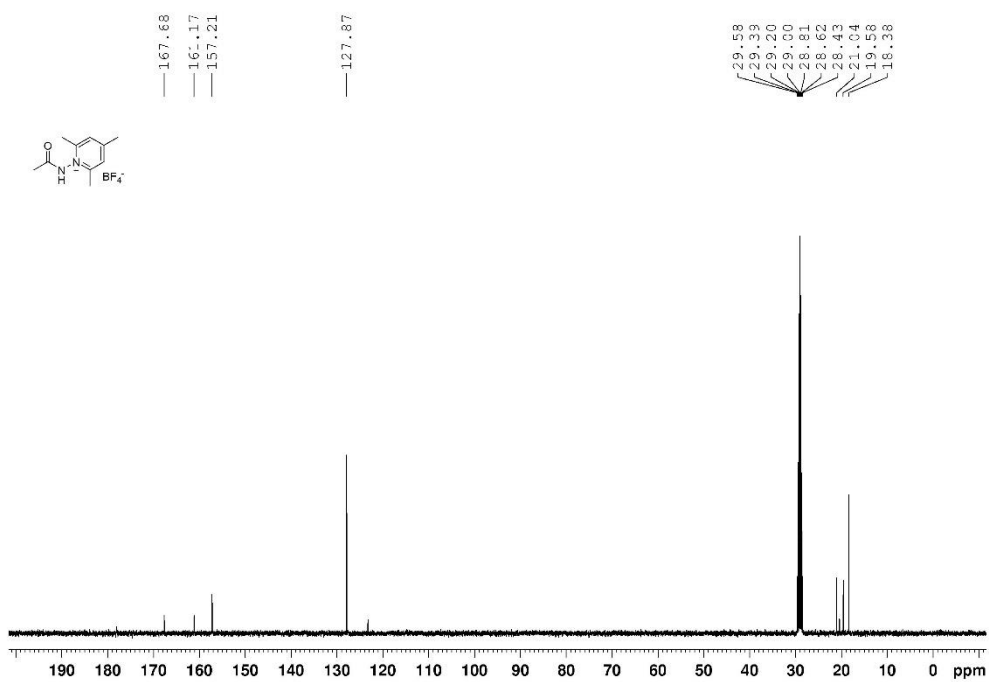

**2n**;  $^1\text{H}$  NMR (400 Hz,  $\text{CDCl}_3$ );  $^{13}\text{C}$  NMR (100 Hz,  $\text{CDCl}_3$ )

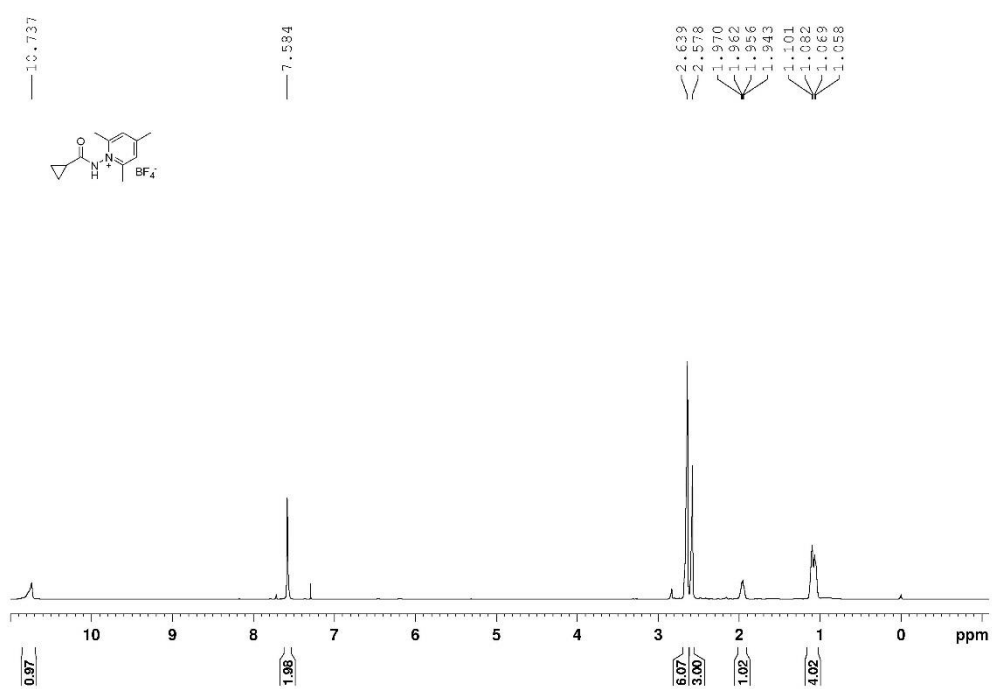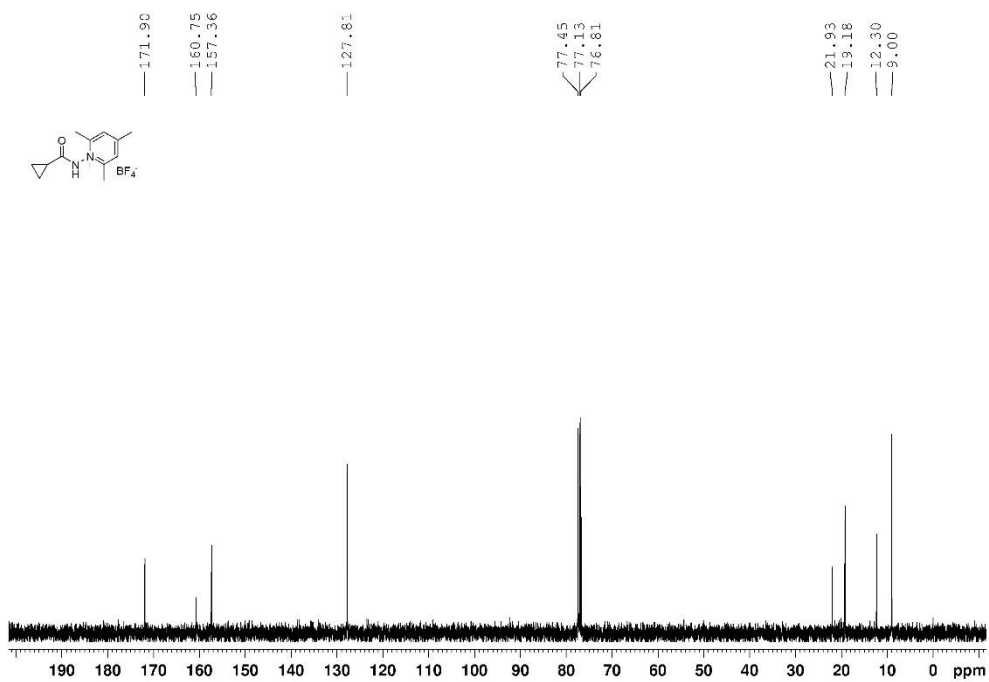



**2o**;  $^1\text{H}$  NMR (400 Hz,  $(\text{CD}_3)_2\text{CO}$ );  $^{13}\text{C}$  NMR (100 Hz,  $(\text{CD}_3)_2\text{CO}$ )

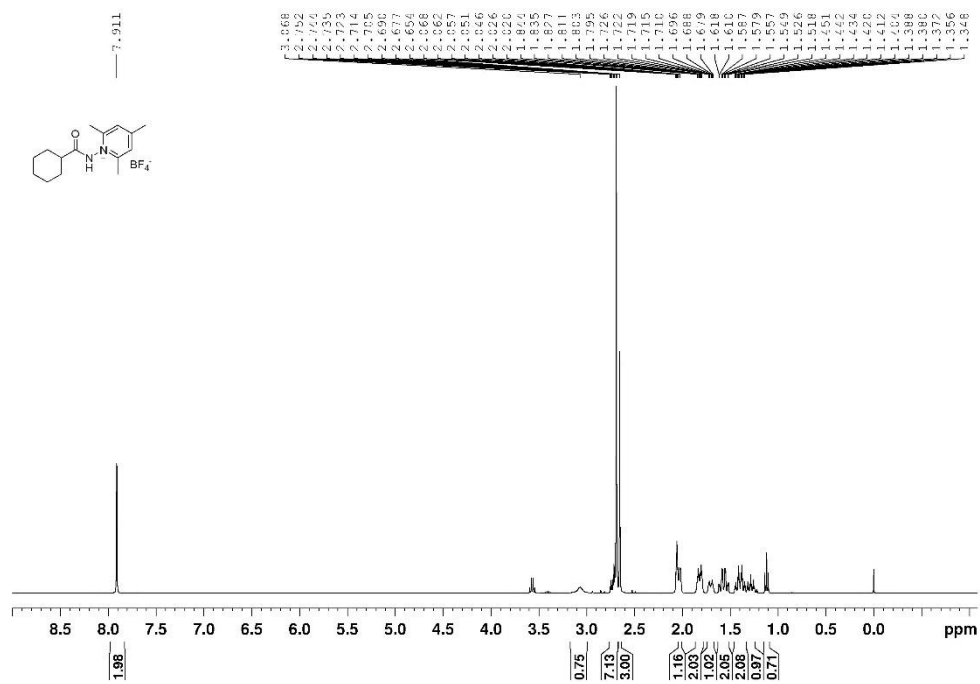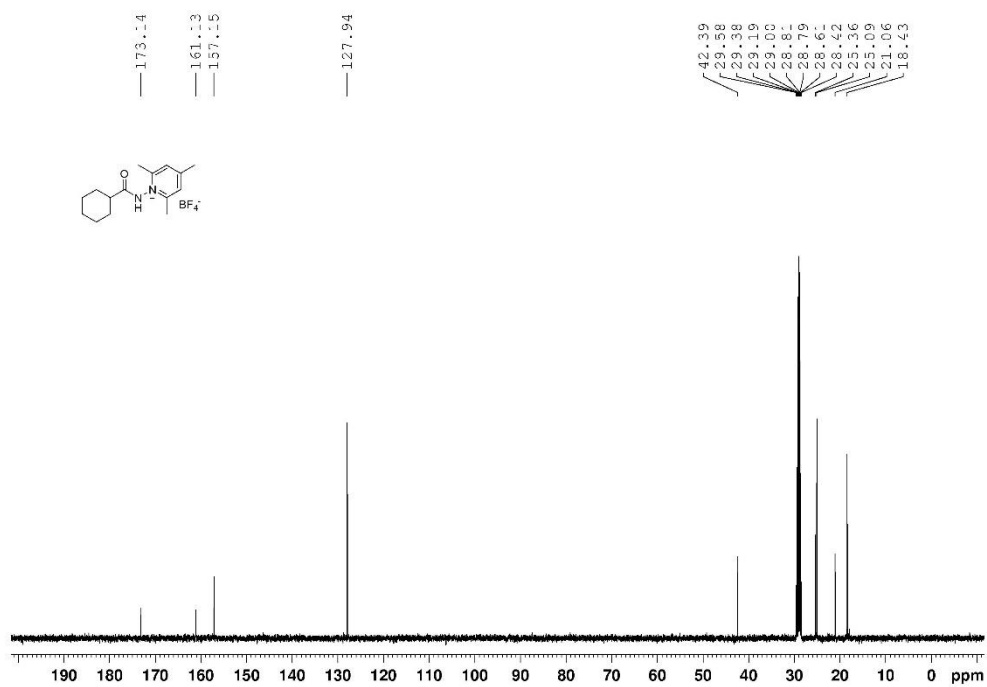

**2p**;  $^1\text{H}$  NMR (400 Hz,  $(\text{CD}_3)_2\text{CO}$ );  $^{13}\text{C}$  NMR (100 Hz,  $(\text{CD}_3)_2\text{CO}$ )

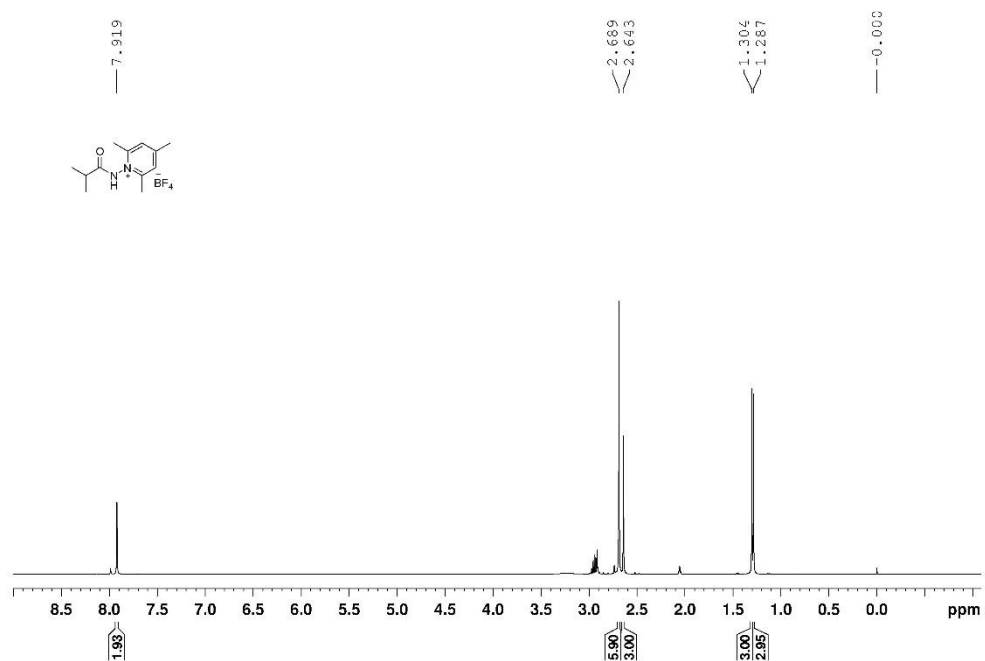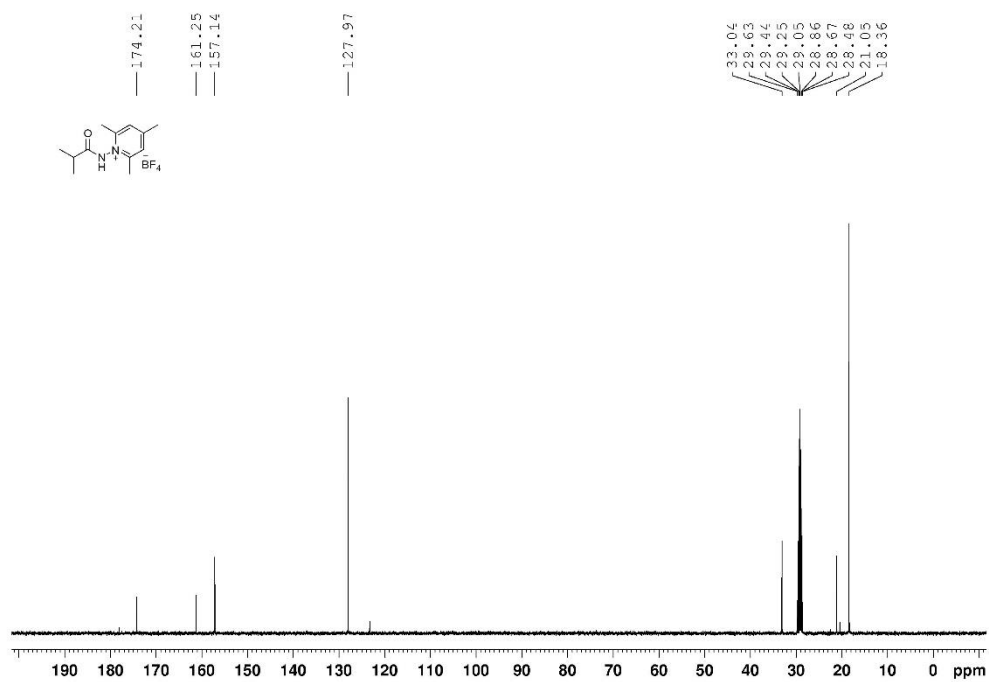

**2q**;  $^1\text{H}$  NMR (400 Hz,  $\text{CDCl}_3$ );  $^{13}\text{C}$  NMR (100 Hz,  $\text{CDCl}_3$ )

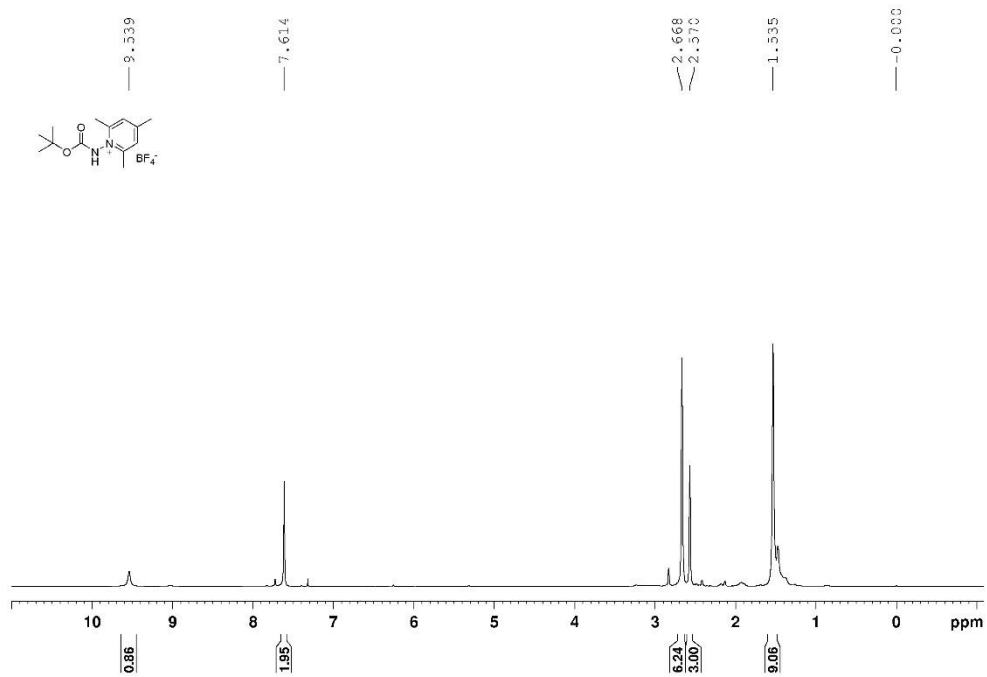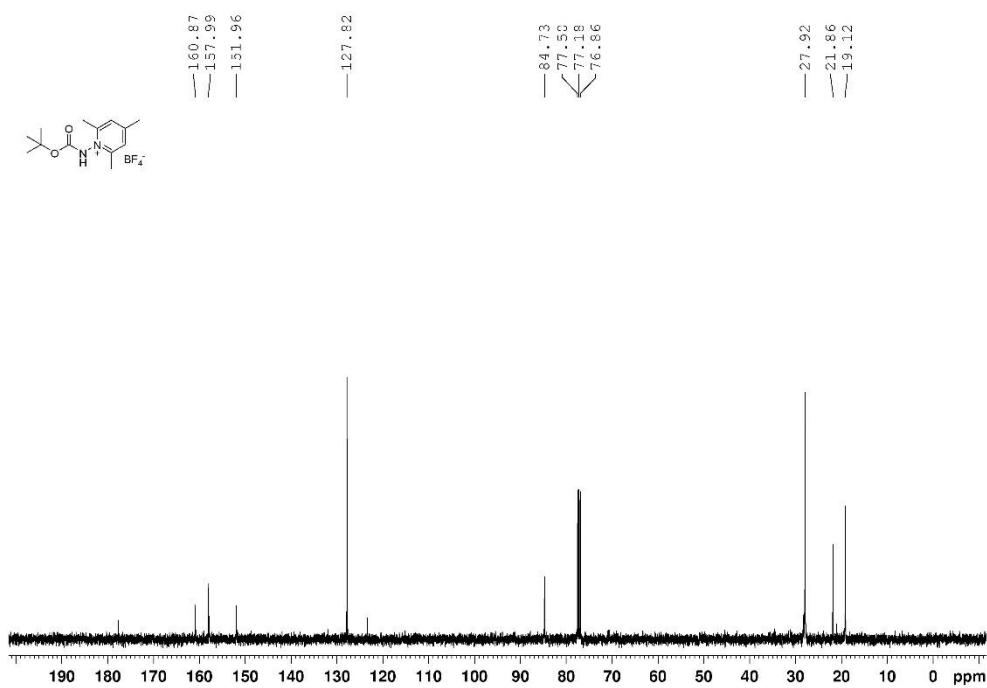

**3a**;  $^1\text{H}$  NMR (400 Hz,  $\text{CDCl}_3$ );  $^{13}\text{C}$  NMR (100 Hz,  $\text{CDCl}_3$ )

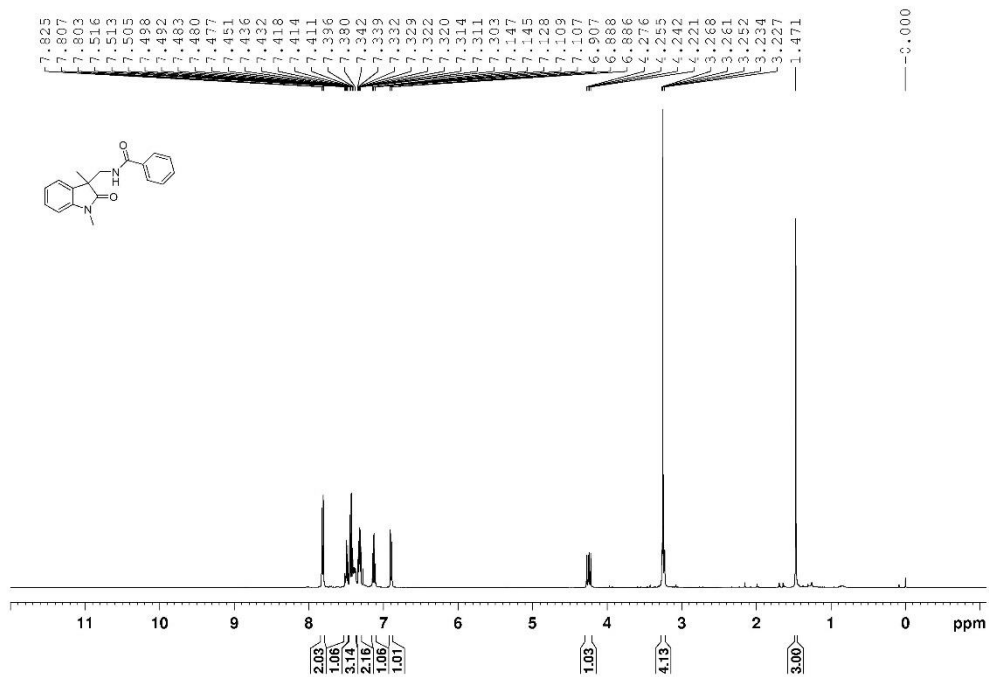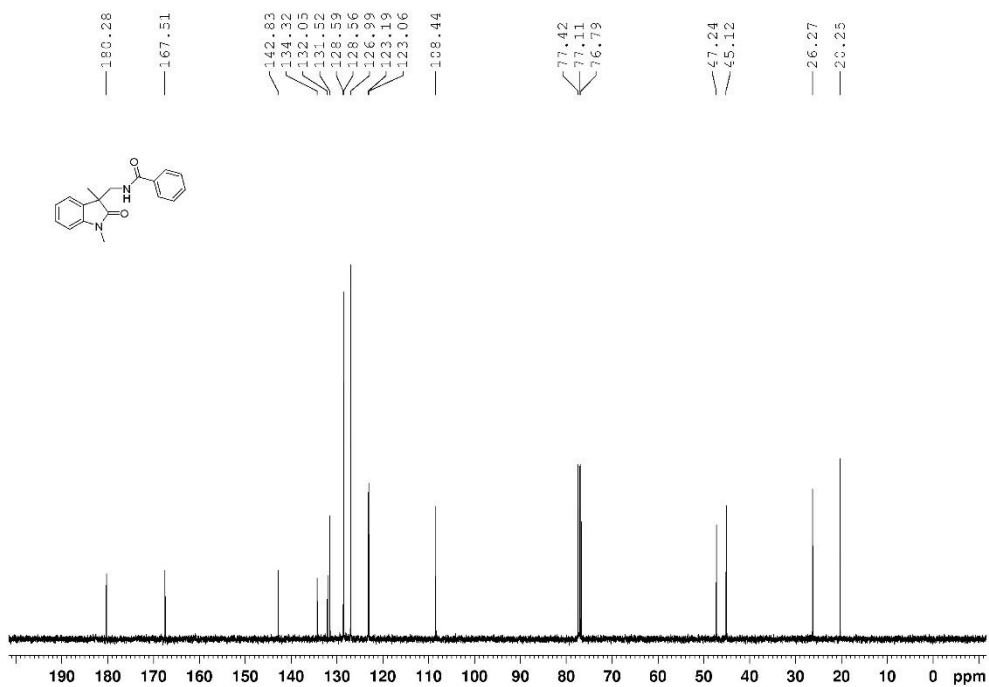

**3b**;  $^1\text{H}$  NMR (400 Hz,  $\text{CDCl}_3$ );  $^{13}\text{C}$  NMR (100 Hz,  $\text{CDCl}_3$ )

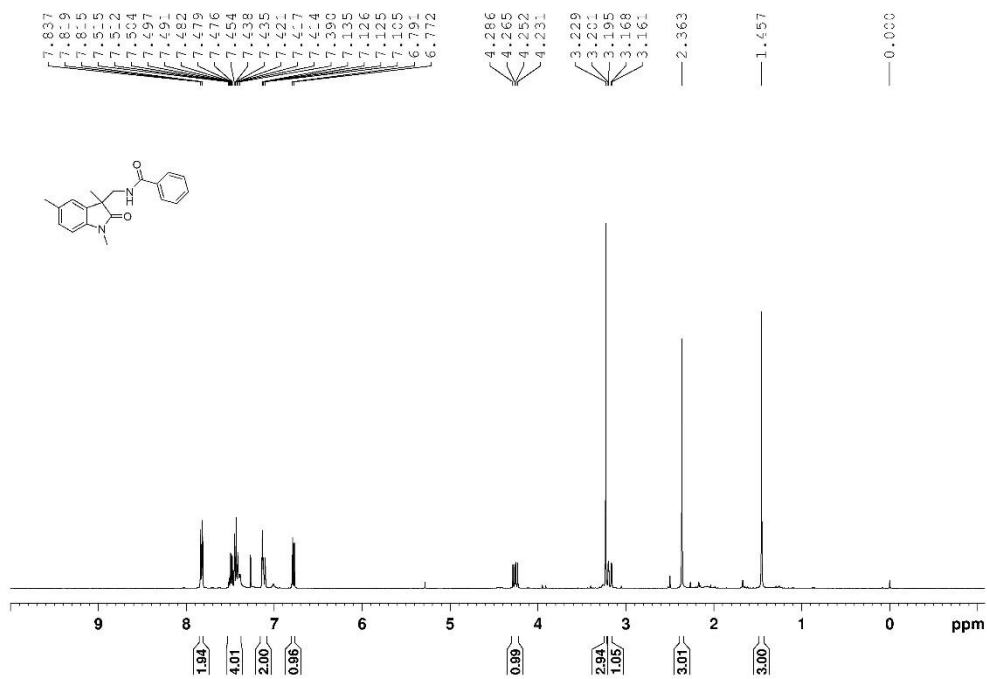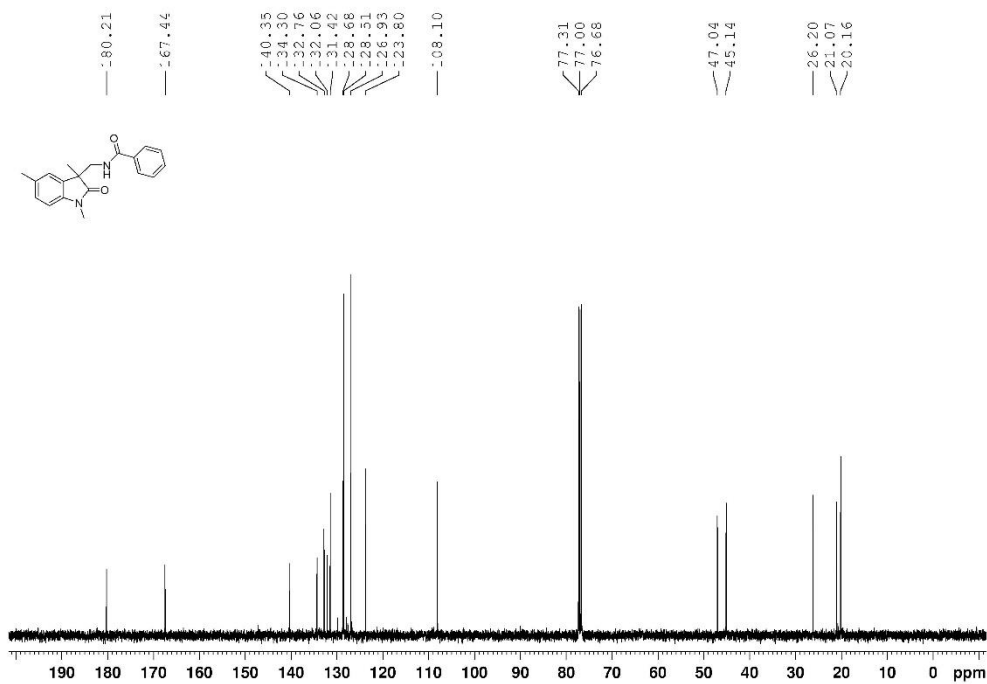

**3c**;  $^1\text{H}$  NMR (400 Hz,  $\text{CDCl}_3$ );  $^{13}\text{C}$  NMR (100 Hz,  $\text{CDCl}_3$ )

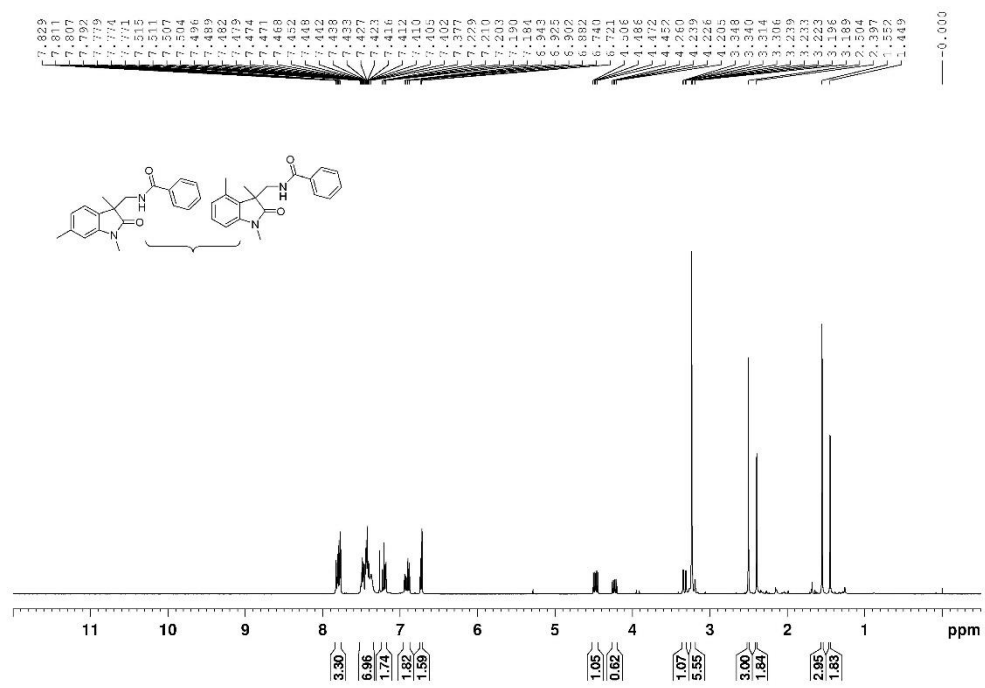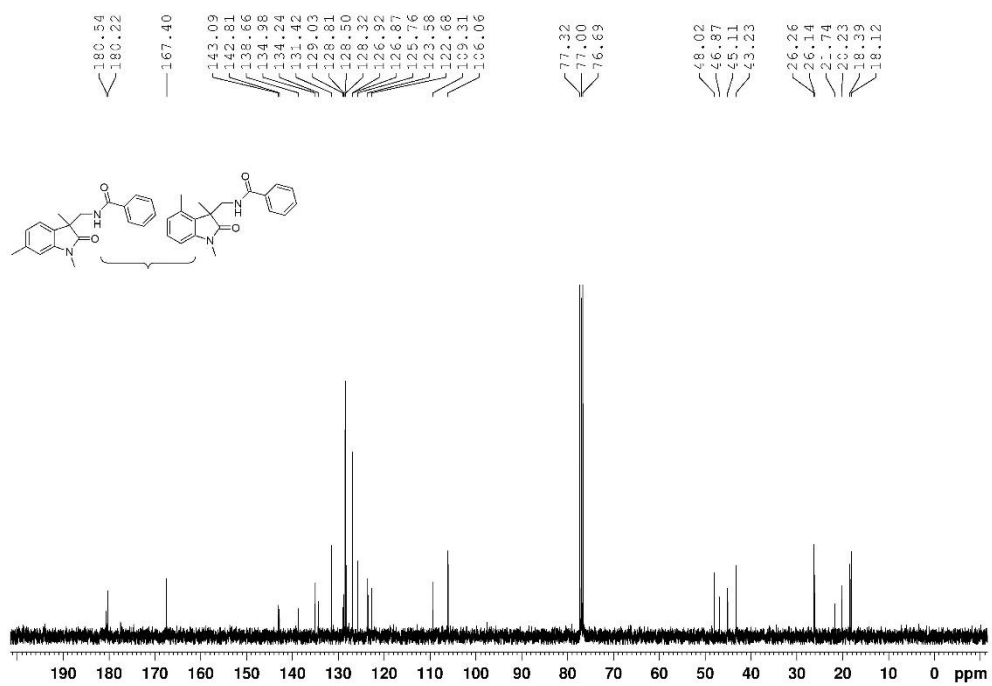

**3d**;  $^1\text{H}$  NMR (400 Hz,  $\text{CDCl}_3$ );  $^{13}\text{C}$  NMR (100 Hz,  $\text{CDCl}_3$ )

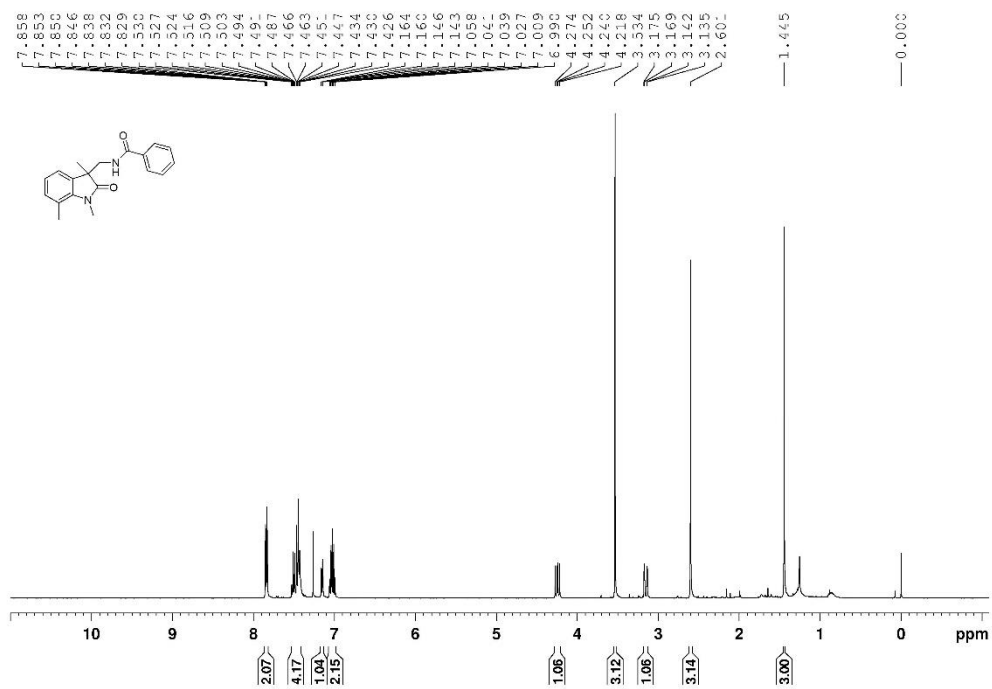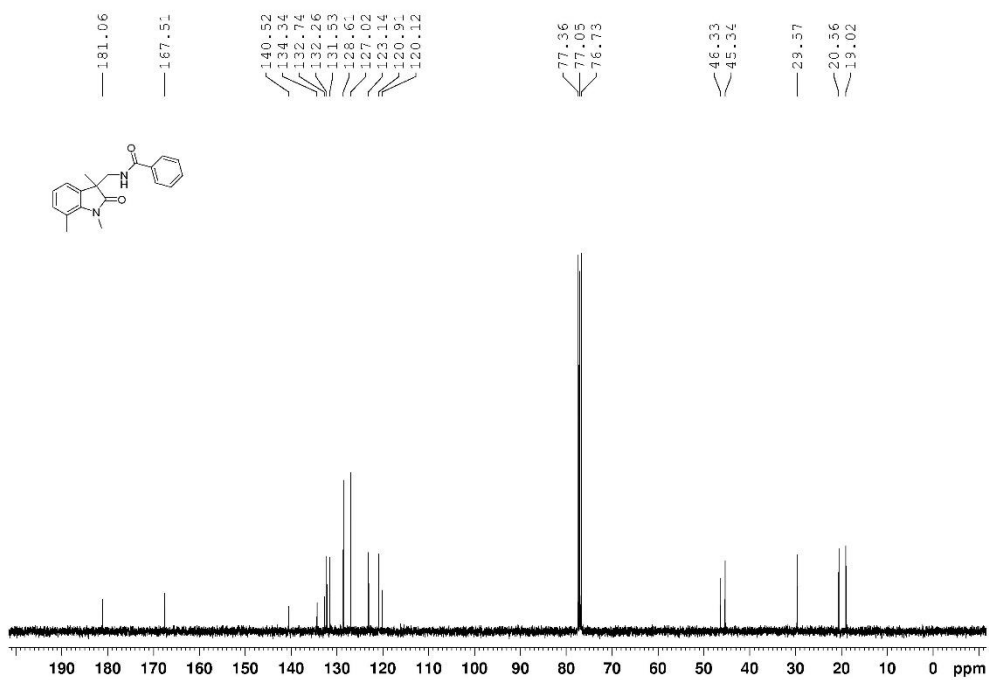

**3e**;  $^1\text{H}$  NMR (400 Hz,  $\text{CDCl}_3$ );  $^{13}\text{C}$  NMR (100 Hz,  $\text{CDCl}_3$ )

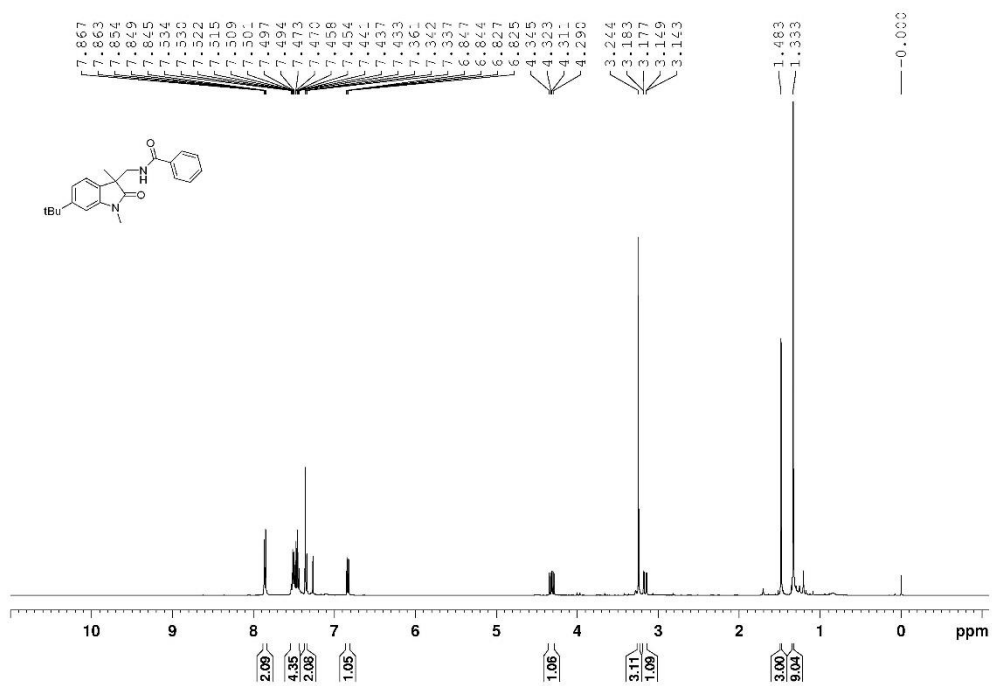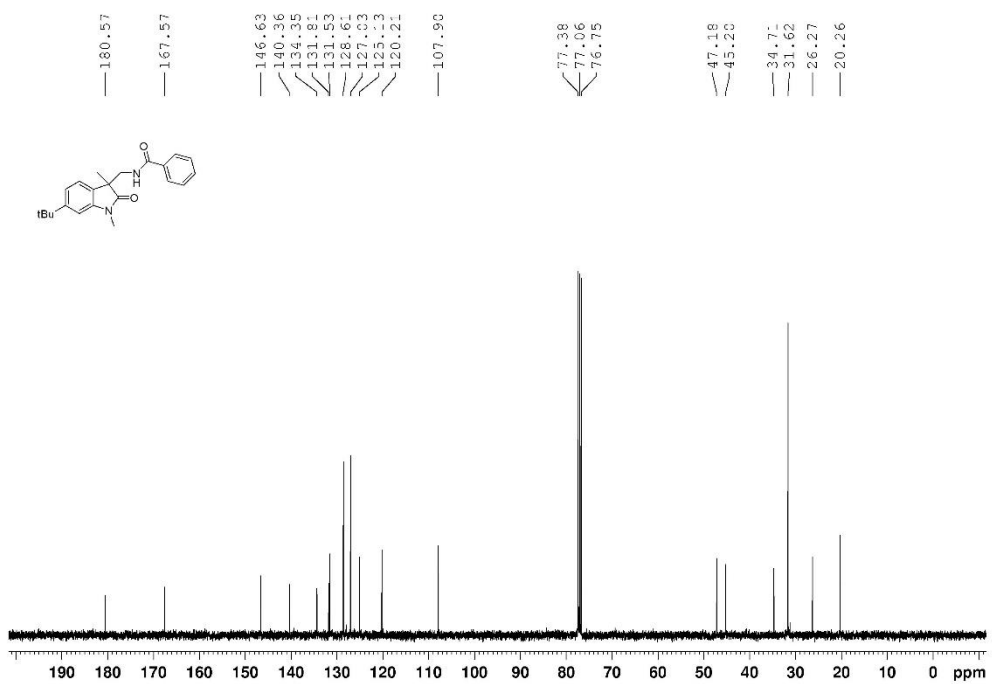



**3f**;  $^1\text{H}$  NMR (600 Hz,  $\text{CDCl}_3$ );  $^{13}\text{C}$  NMR (150 Hz,  $\text{CDCl}_3$ )

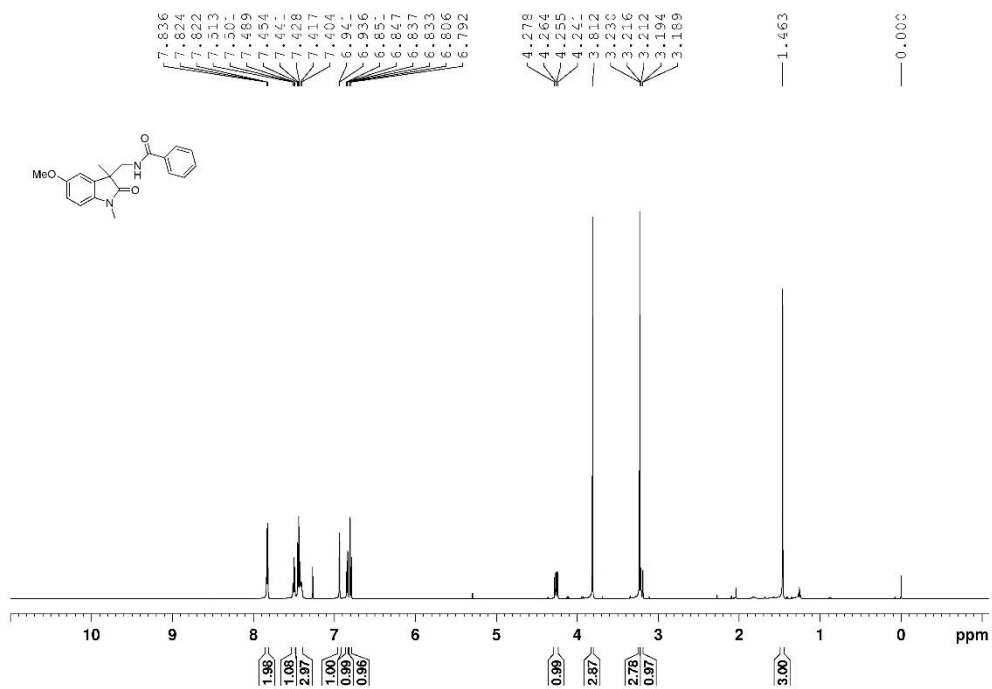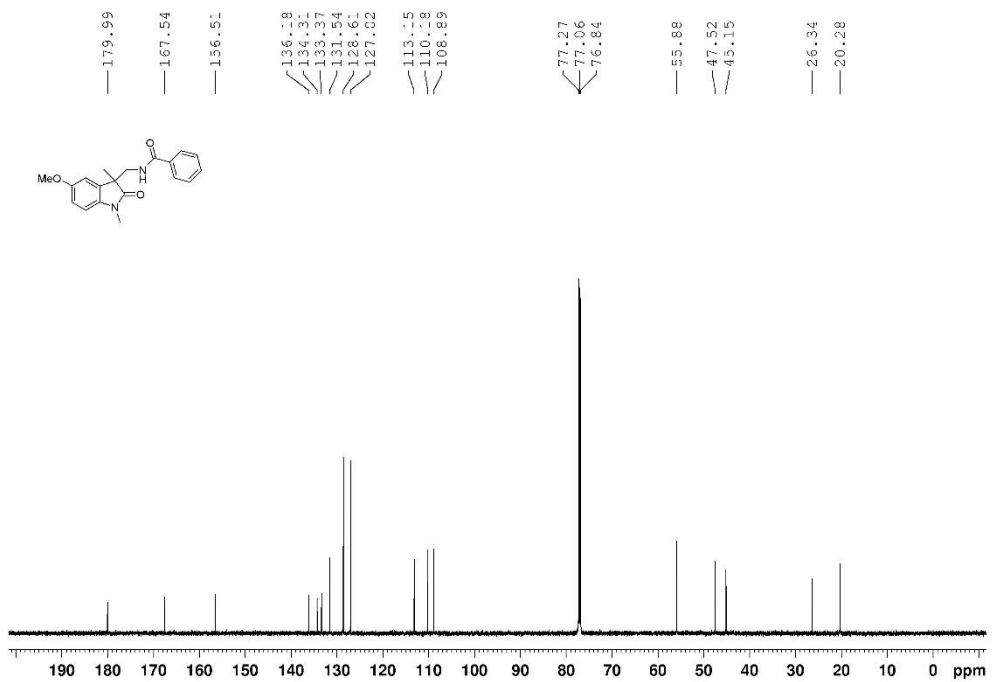

**3g**;  $^1\text{H}$  NMR (400 Hz,  $\text{CDCl}_3$ );  $^{13}\text{C}$  NMR (100 Hz,  $\text{CDCl}_3$ );  $^{19}\text{F}$  NMR (376 Hz,  $\text{CDCl}_3$ )

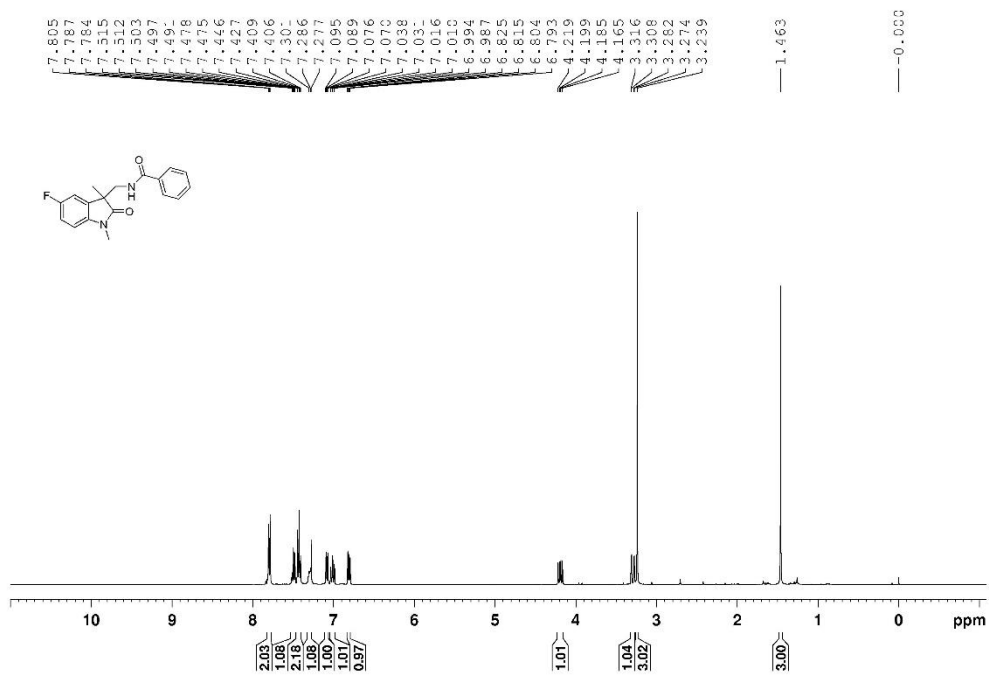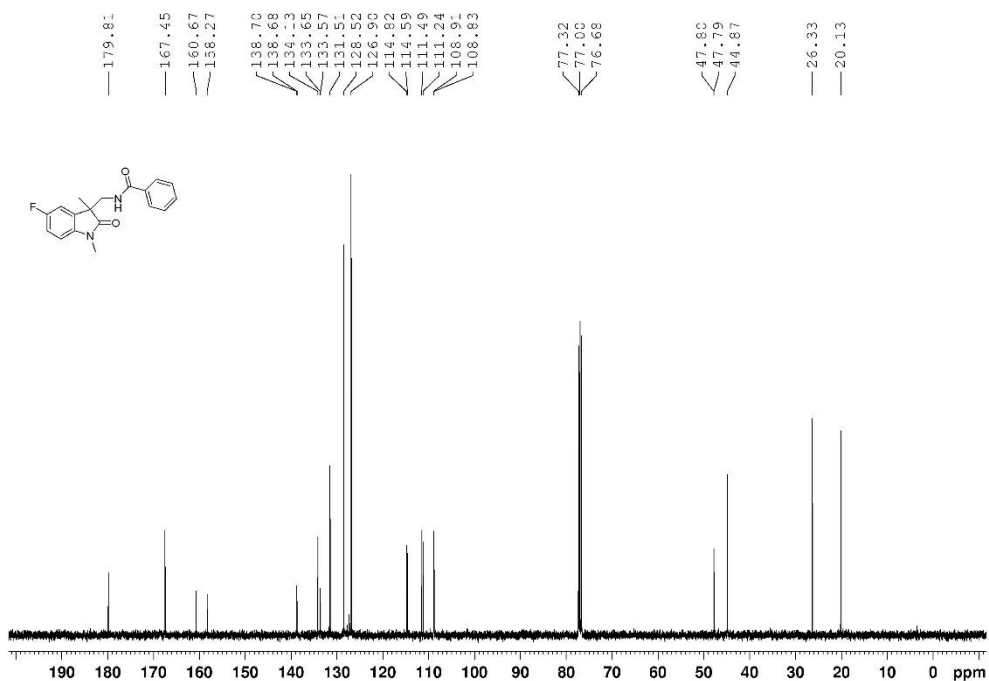

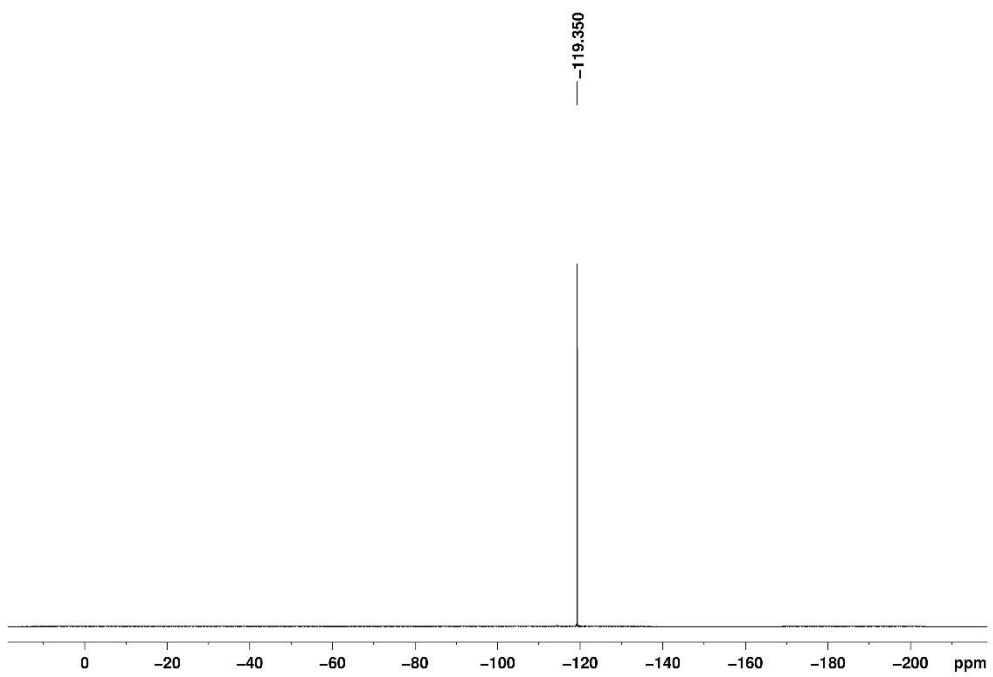

**3h**;  $^1\text{H}$  NMR (400 Hz,  $\text{CDCl}_3$ );  $^{13}\text{C}$  NMR (100 Hz,  $\text{CDCl}_3$ )

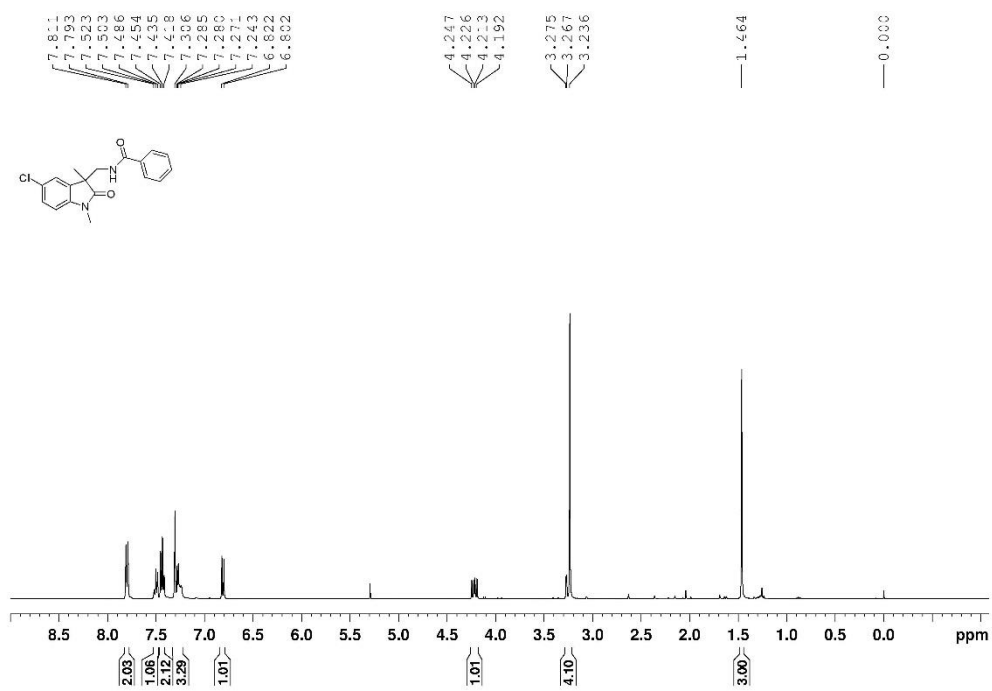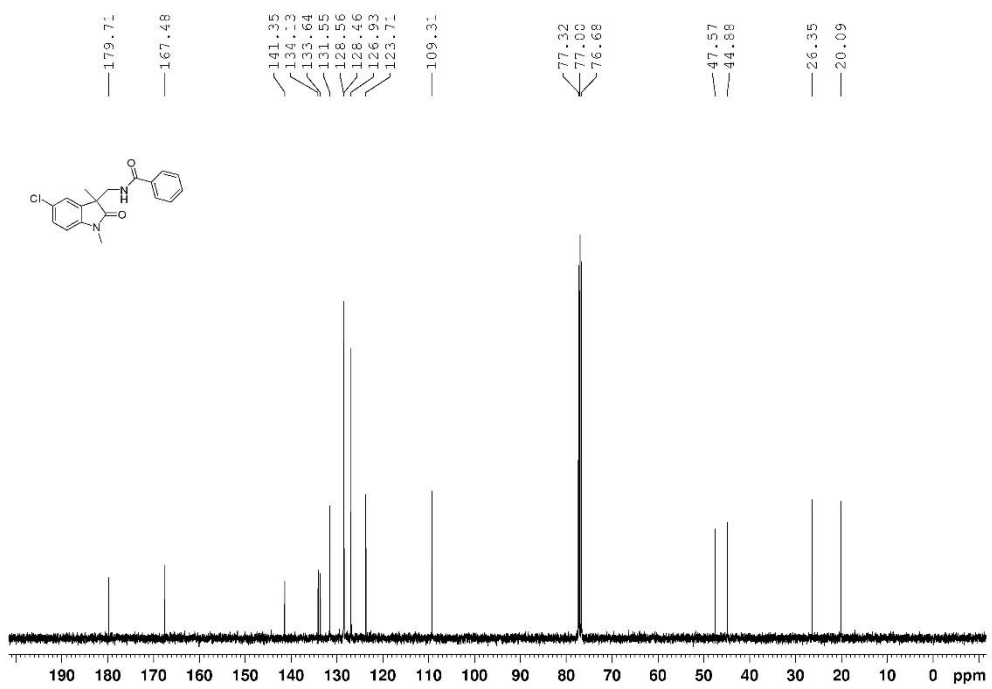

**3i**;  $^1\text{H}$  NMR (400 Hz,  $\text{CDCl}_3$ );  $^{13}\text{C}$  NMR (100 Hz,  $\text{CDCl}_3$ )

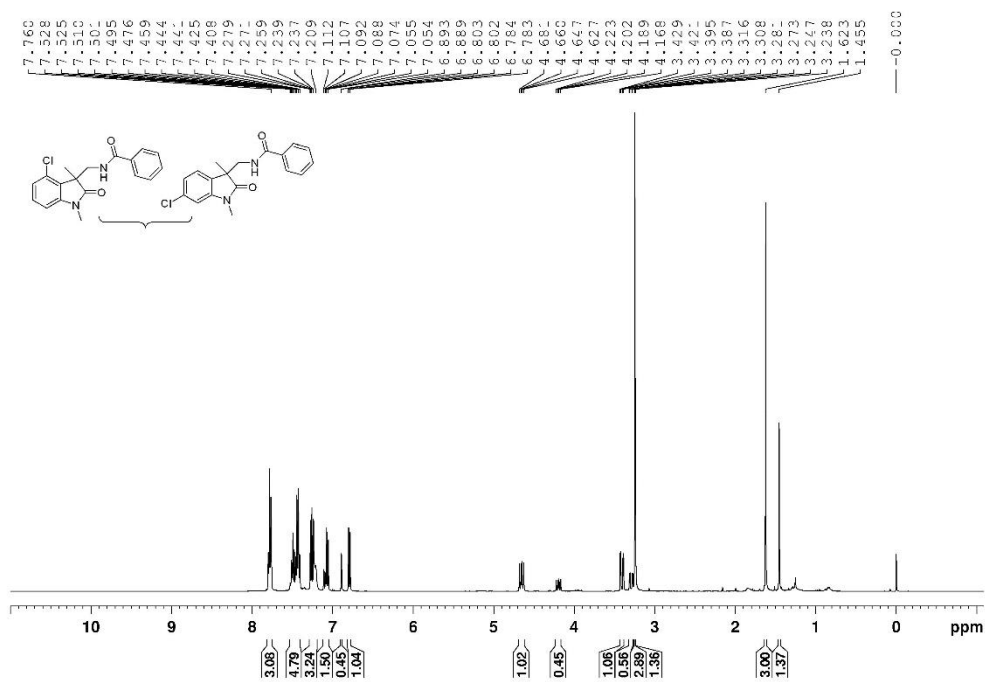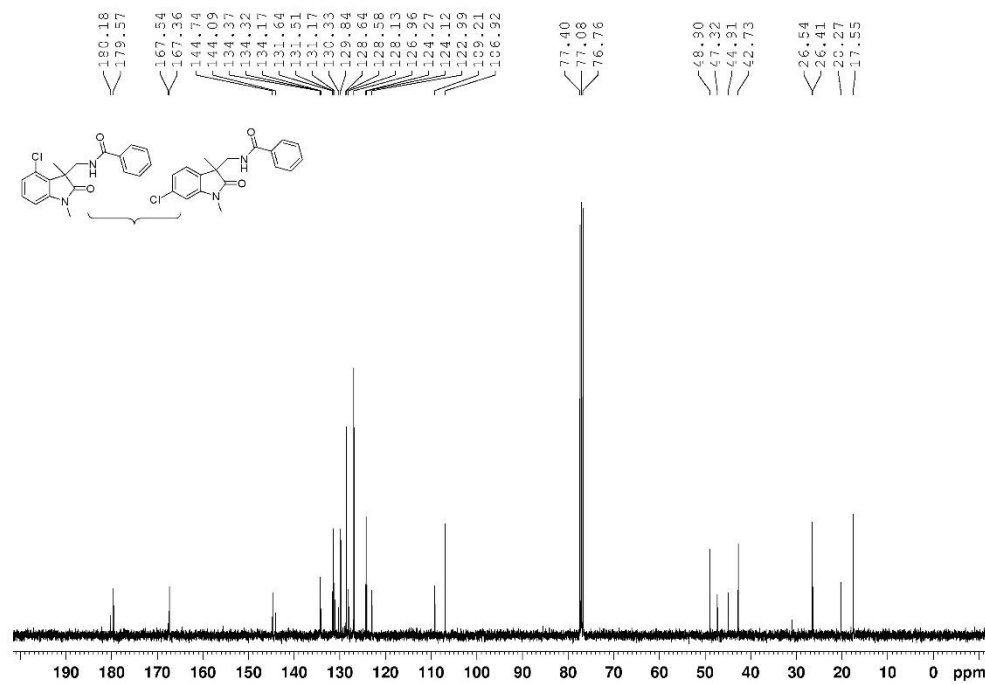

**3j**;  $^1\text{H}$  NMR (400 Hz,  $\text{CDCl}_3$ );  $^{13}\text{C}$  NMR (100 Hz,  $\text{CDCl}_3$ )

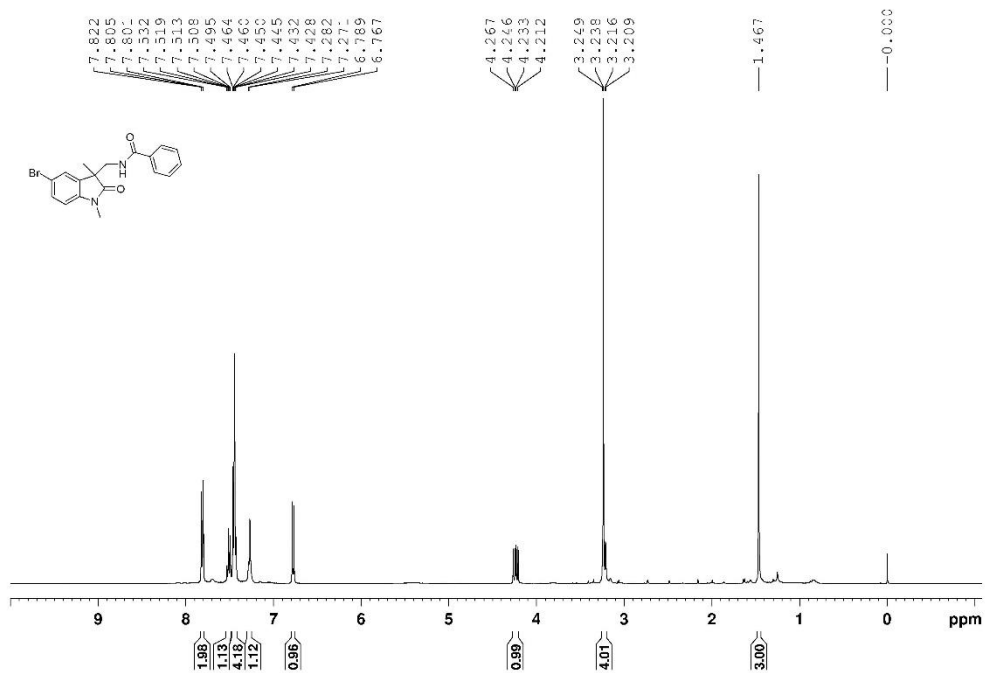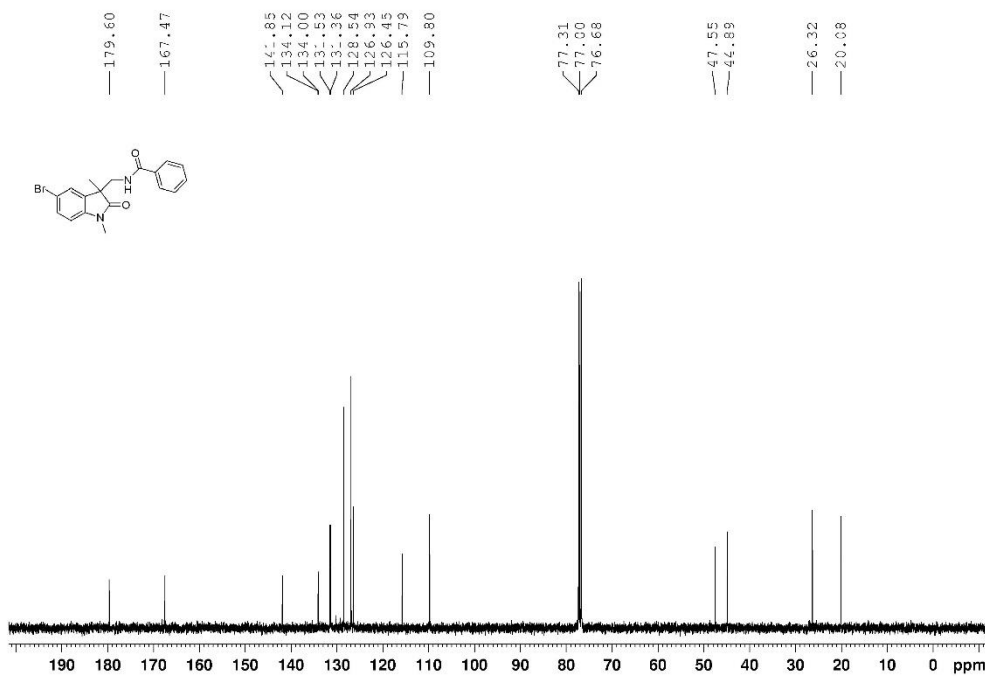

**3k**;  $^1\text{H}$  NMR (600 Hz,  $\text{CDCl}_3$ );  $^{13}\text{C}$  NMR (150 Hz,  $\text{CDCl}_3$ )

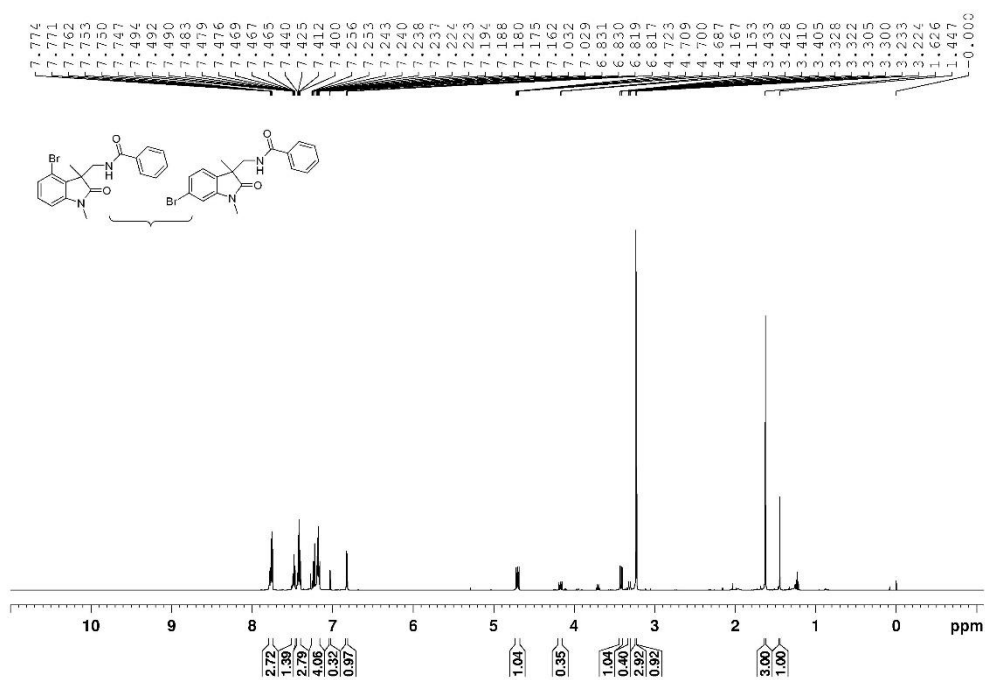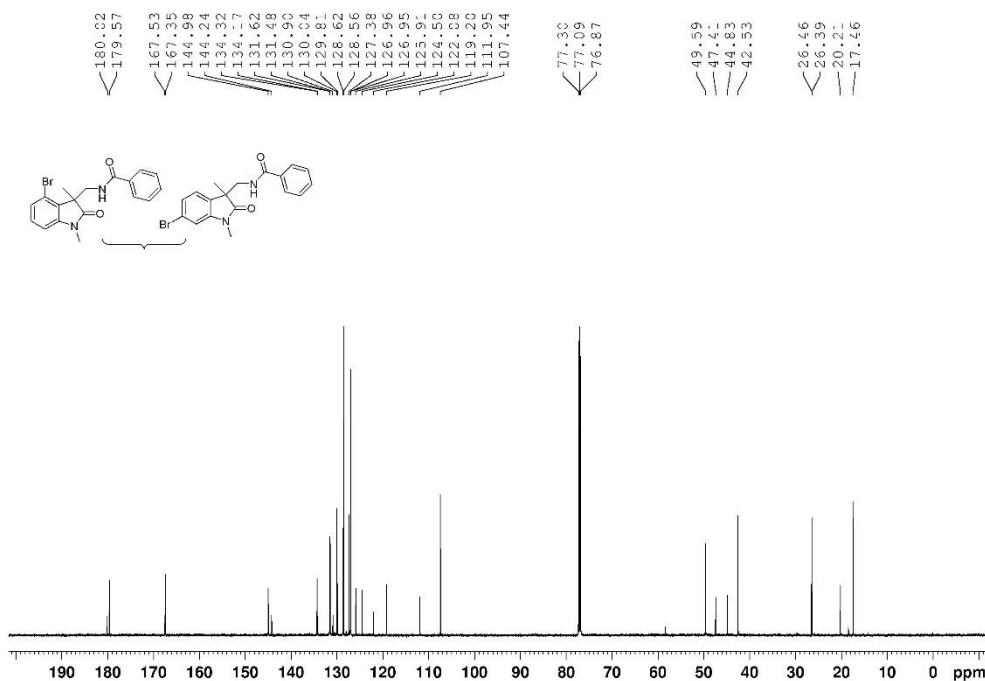

**3i**;  $^1\text{H}$  NMR (600 Hz,  $\text{CDCl}_3$ );  $^{13}\text{C}$  NMR (150 Hz,  $\text{CDCl}_3$ )

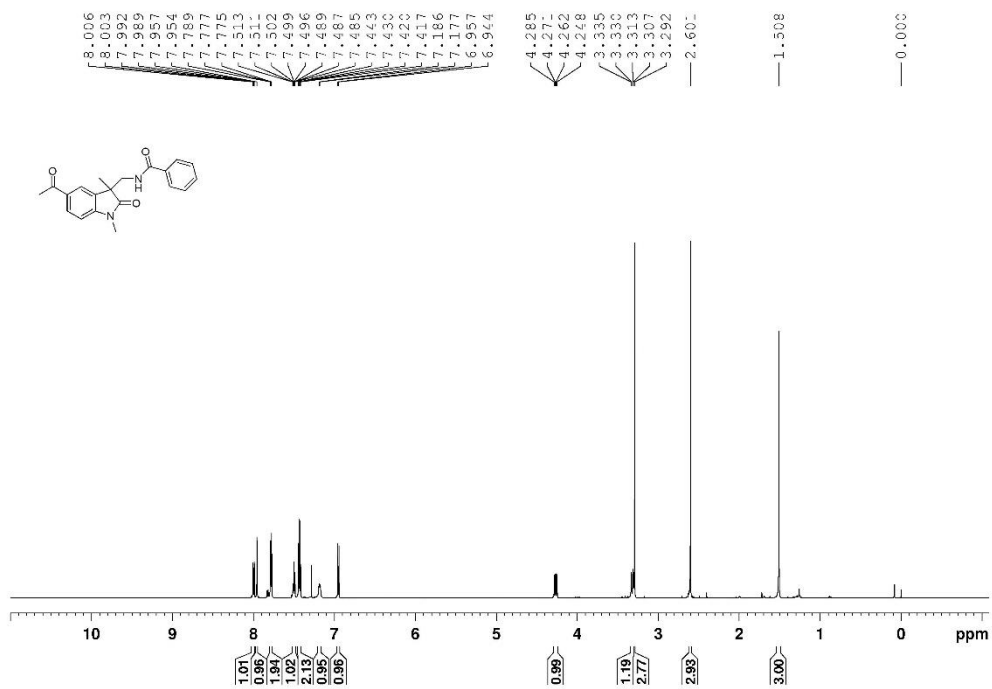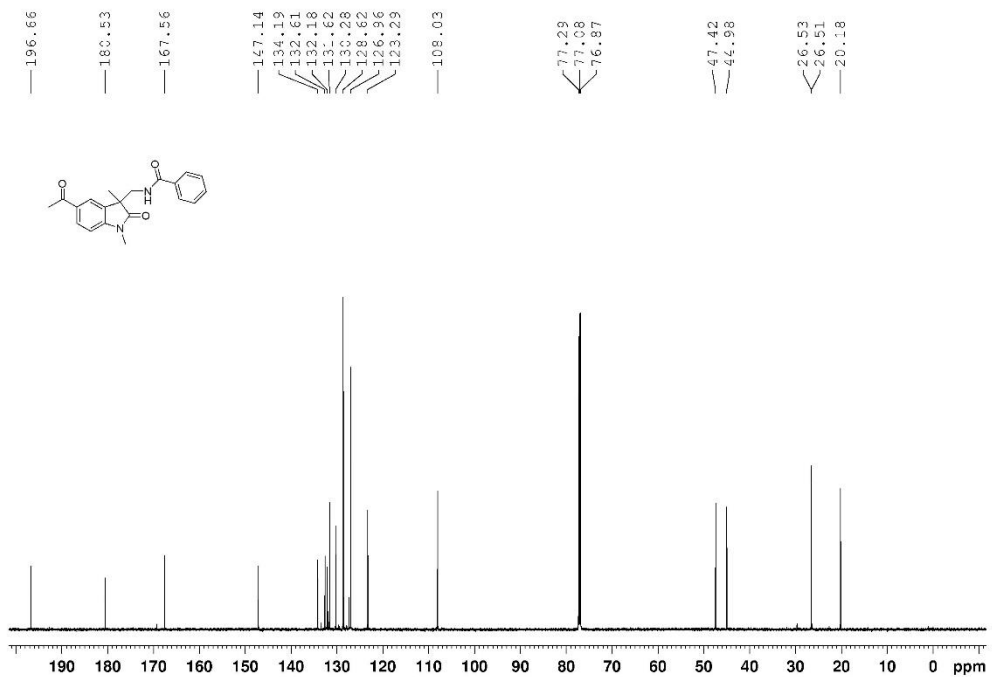



**3m**;  $^1\text{H}$  NMR (400 Hz,  $\text{CDCl}_3$ );  $^{13}\text{C}$  NMR (100 Hz,  $\text{CDCl}_3$ );  $^{19}\text{F}$  NMR (376 Hz,  $\text{CDCl}_3$ )

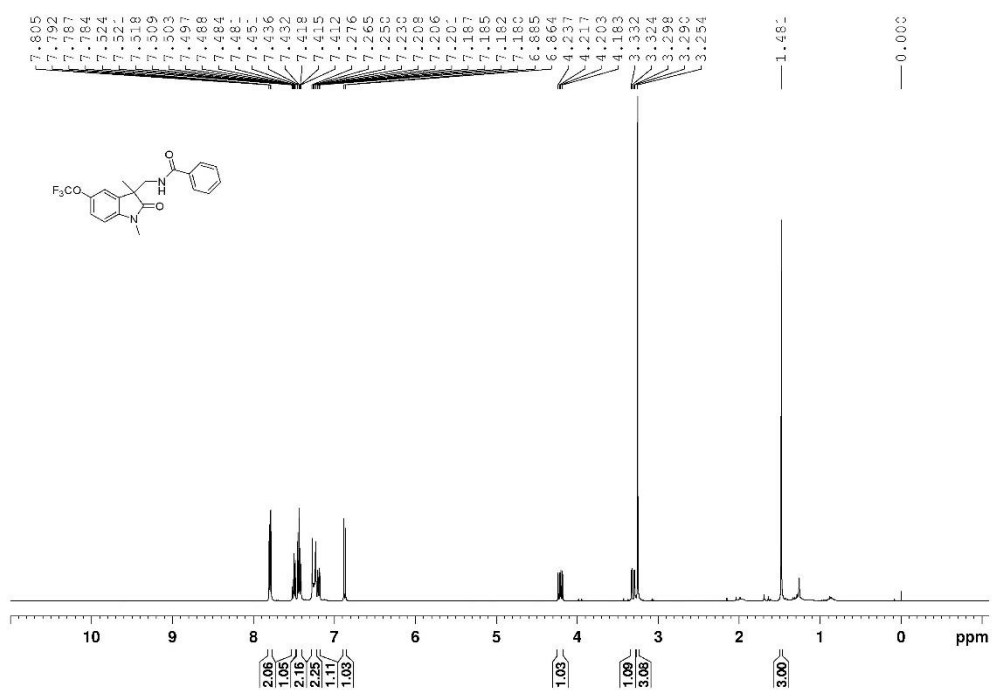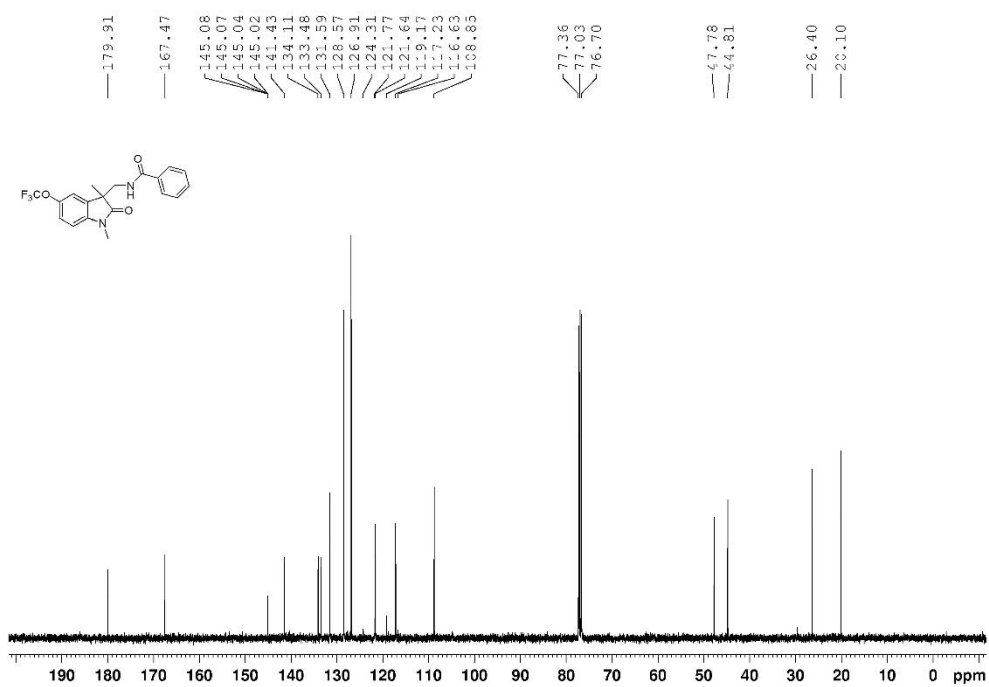

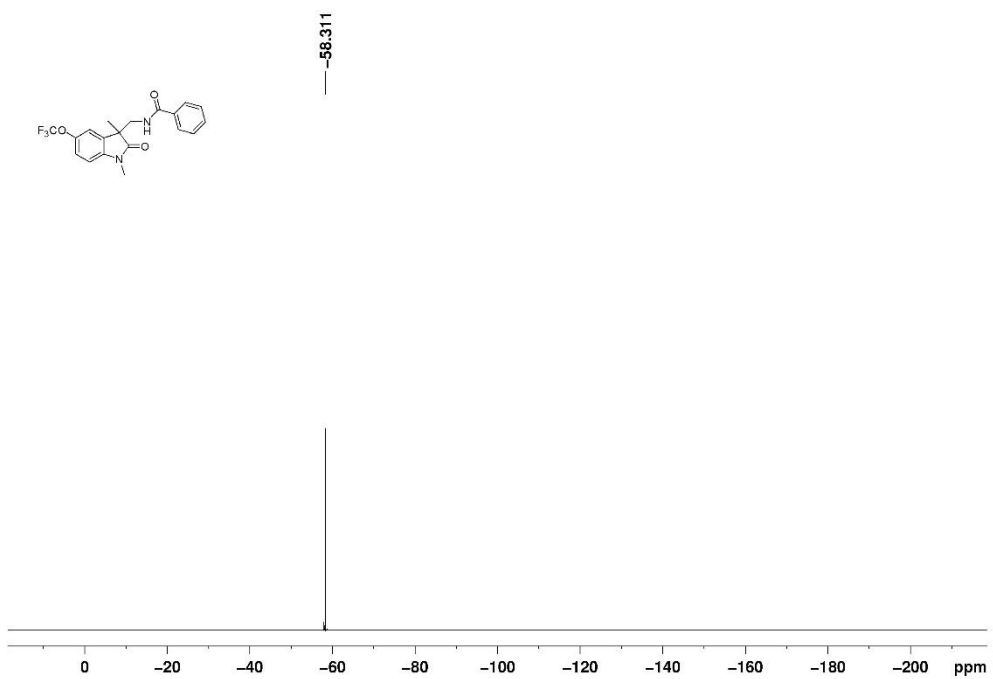

**3n**;  $^1\text{H}$  NMR (400 Hz,  $\text{CDCl}_3$ );  $^{13}\text{C}$  NMR (100 Hz,  $\text{CDCl}_3$ )

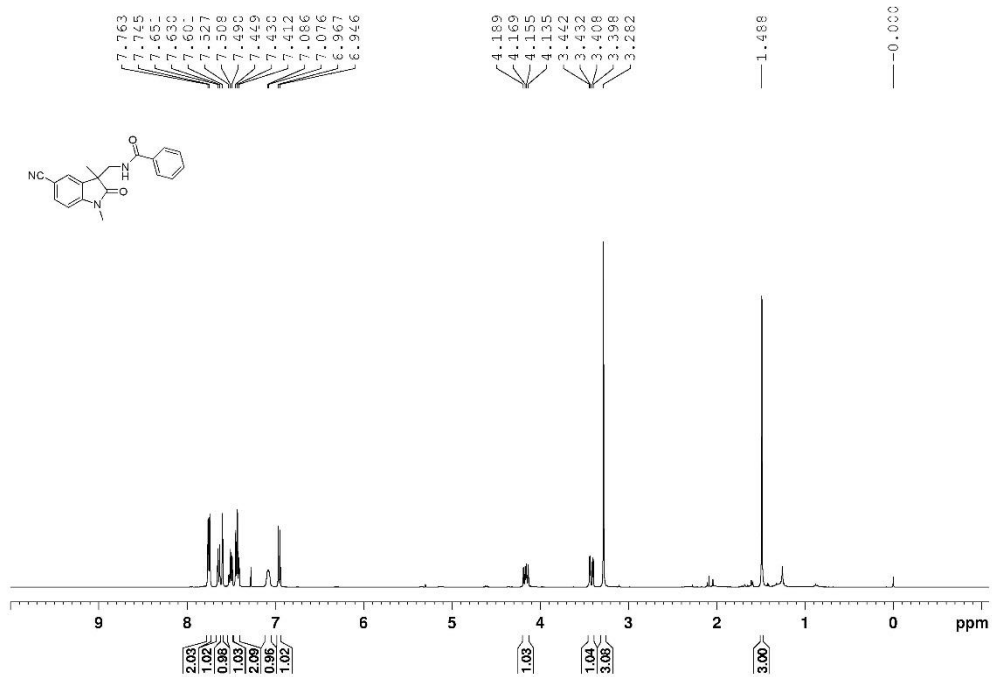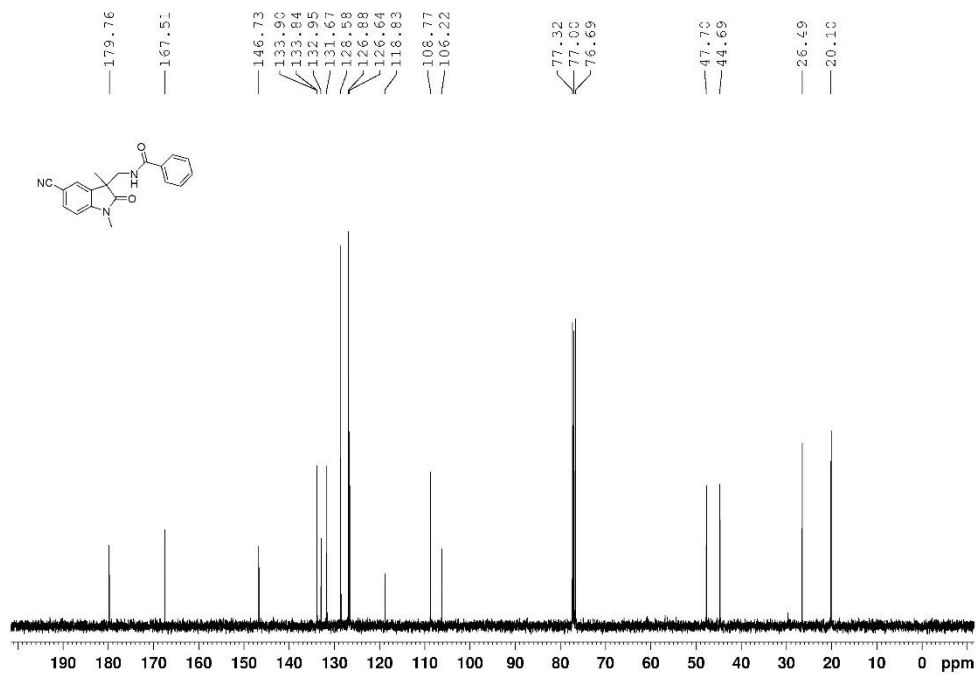

**3o**;  $^1\text{H}$  NMR (400 Hz,  $\text{CDCl}_3$ );  $^{13}\text{C}$  NMR (100 Hz,  $\text{CDCl}_3$ )

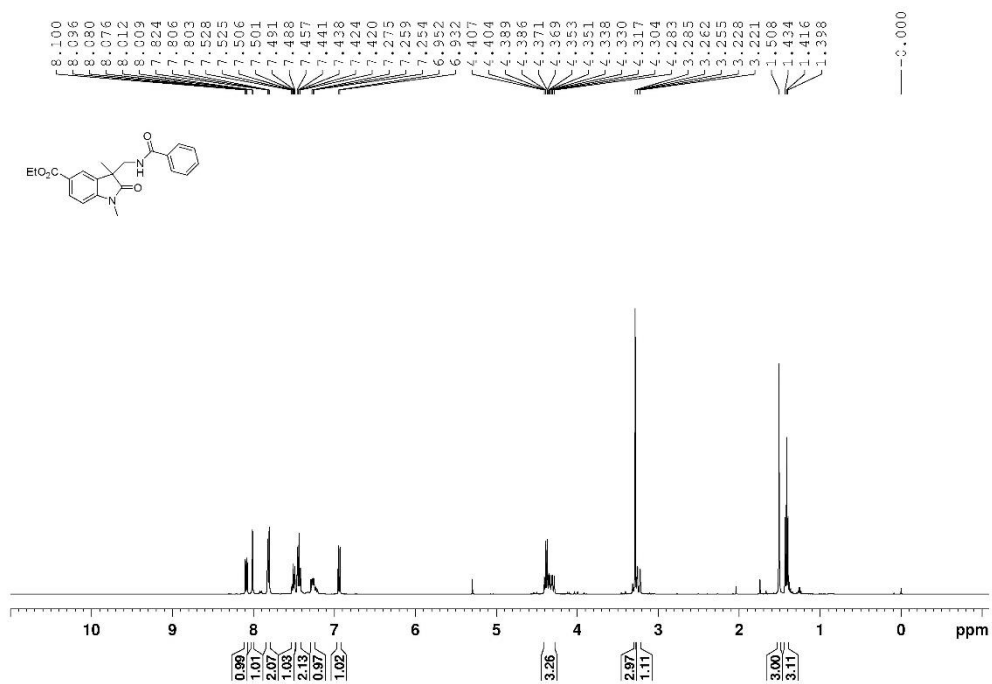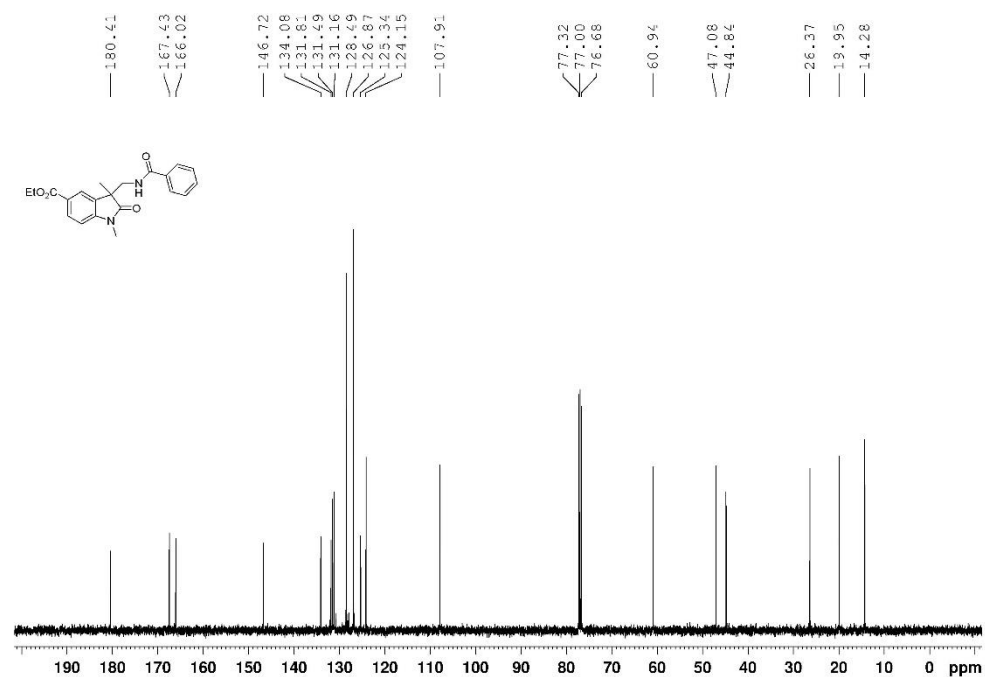

**3p**;  $^1\text{H}$  NMR (600 Hz,  $\text{CDCl}_3$ );  $^{13}\text{C}$  NMR (150 Hz,  $\text{CDCl}_3$ );  $^{19}\text{F}$  NMR (376 Hz,  $\text{CDCl}_3$ )

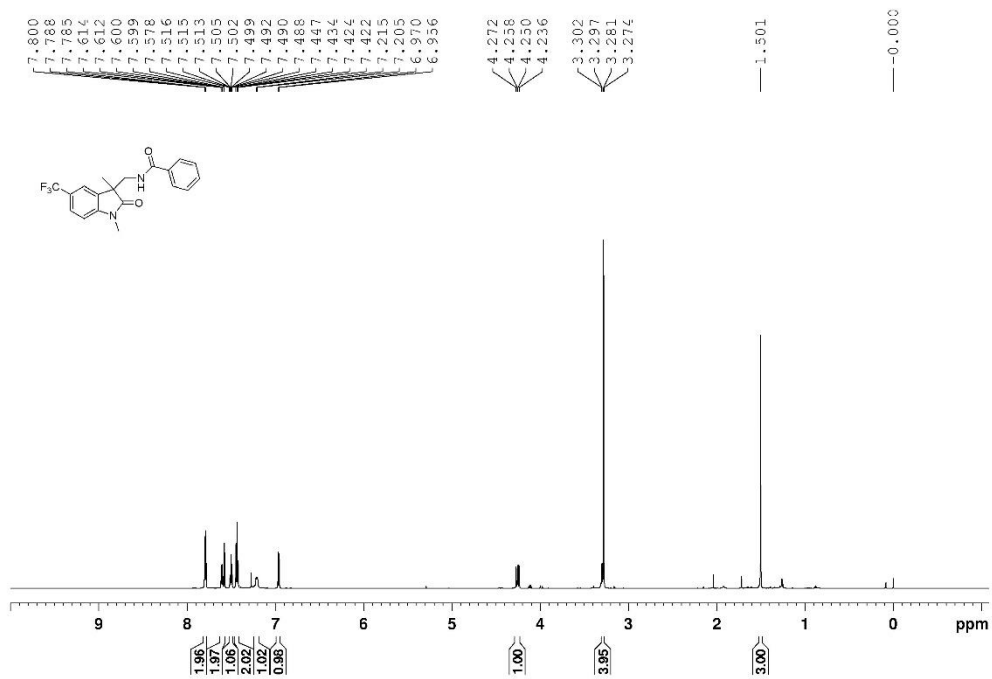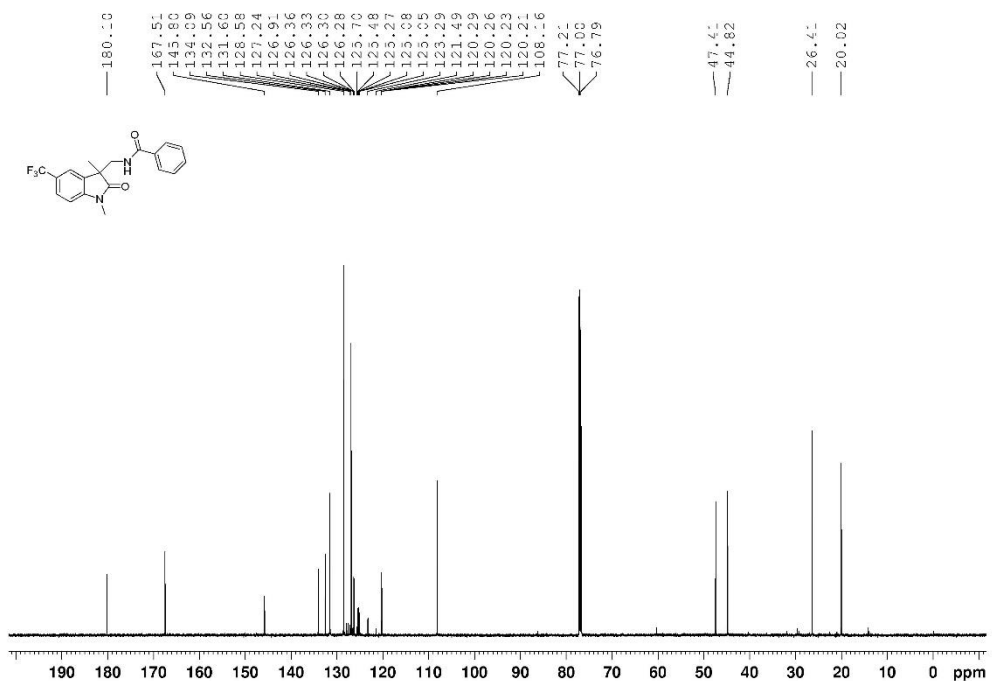

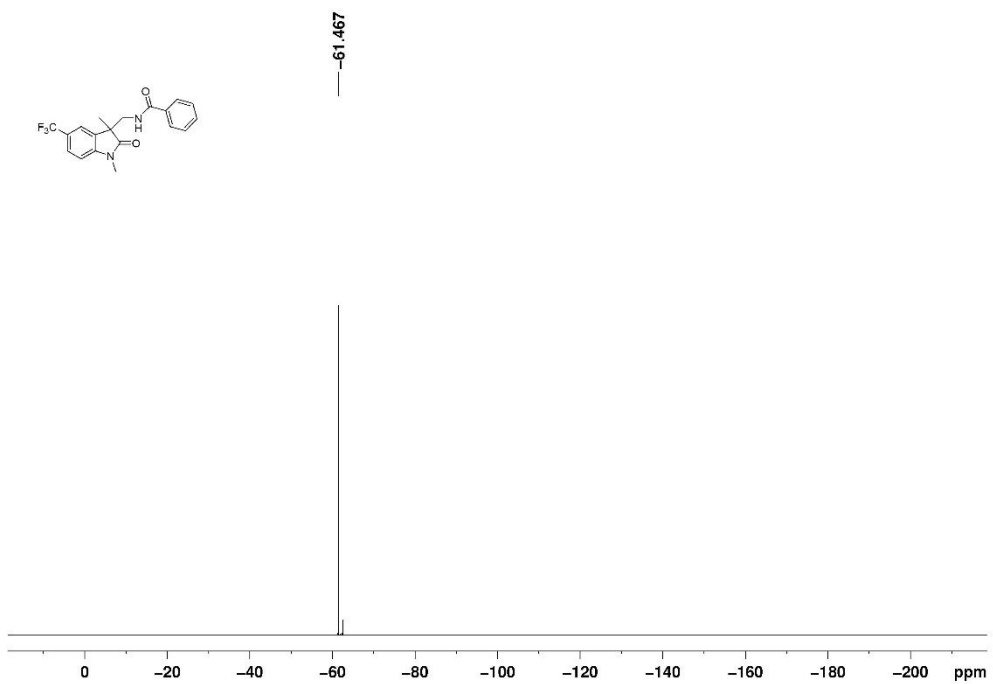

**3q**;  $^1\text{H}$  NMR (400 Hz,  $\text{CDCl}_3$ );  $^{13}\text{C}$  NMR (100 Hz,  $\text{CDCl}_3$ )

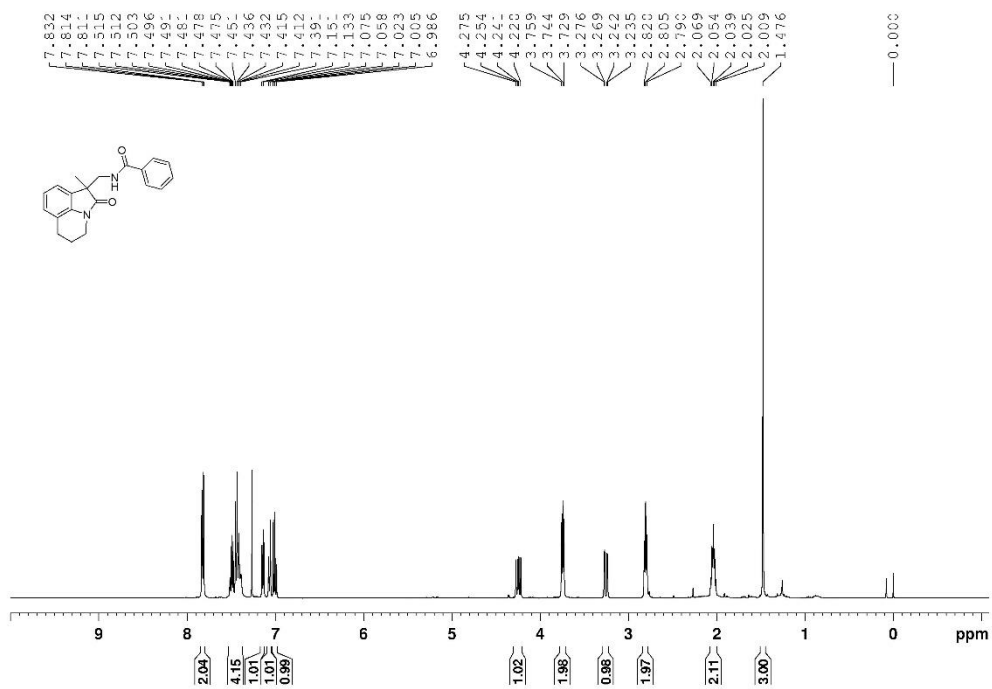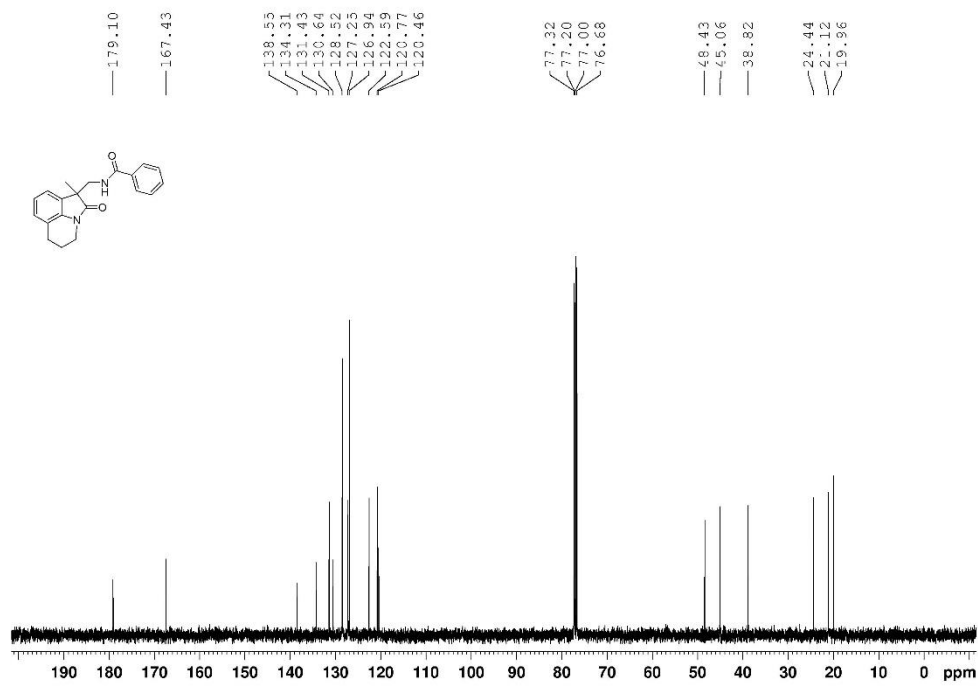

**3r**;  $^1\text{H}$  NMR (400 Hz,  $\text{CDCl}_3$ );  $^{13}\text{C}$  NMR (100 Hz,  $\text{CDCl}_3$ )

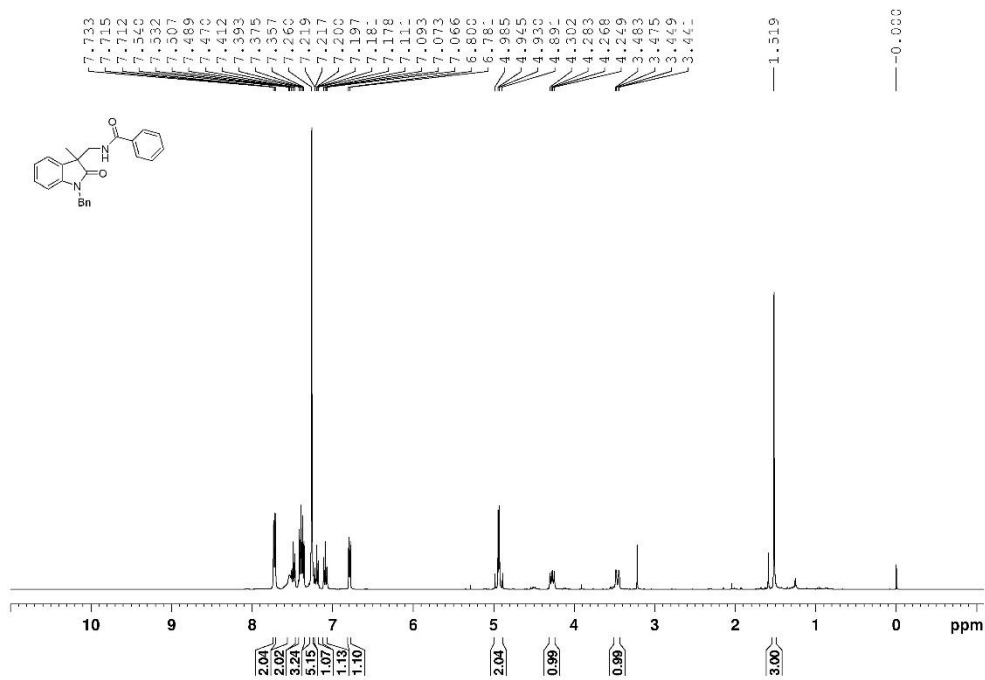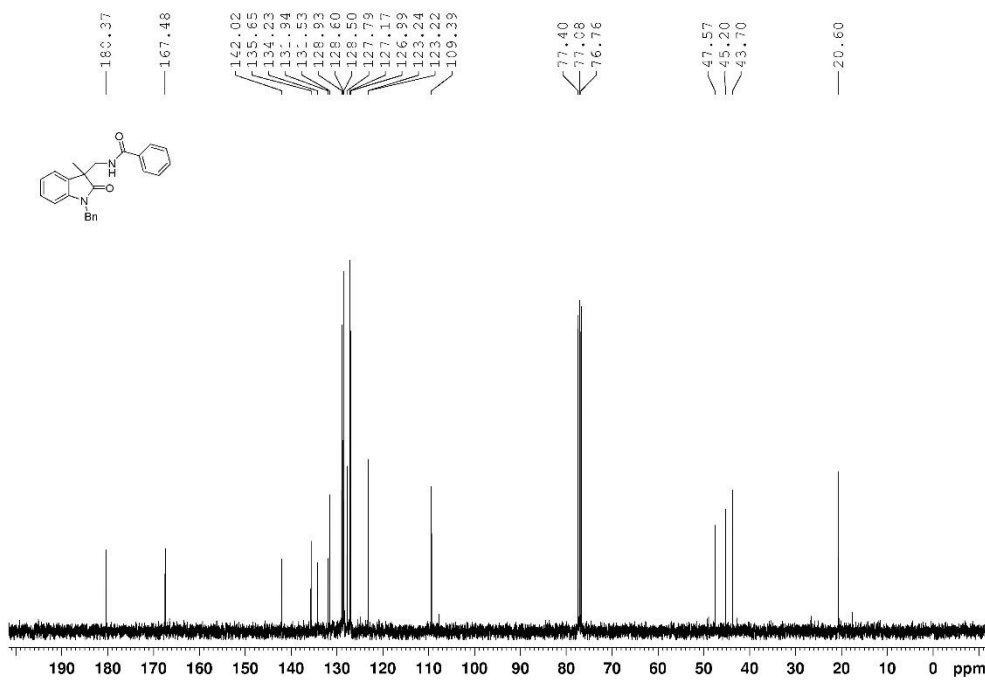



3s;  $^1\text{H}$  NMR (400 Hz,  $\text{CDCl}_3$ );  $^{13}\text{C}$  NMR (100 Hz,  $\text{CDCl}_3$ )

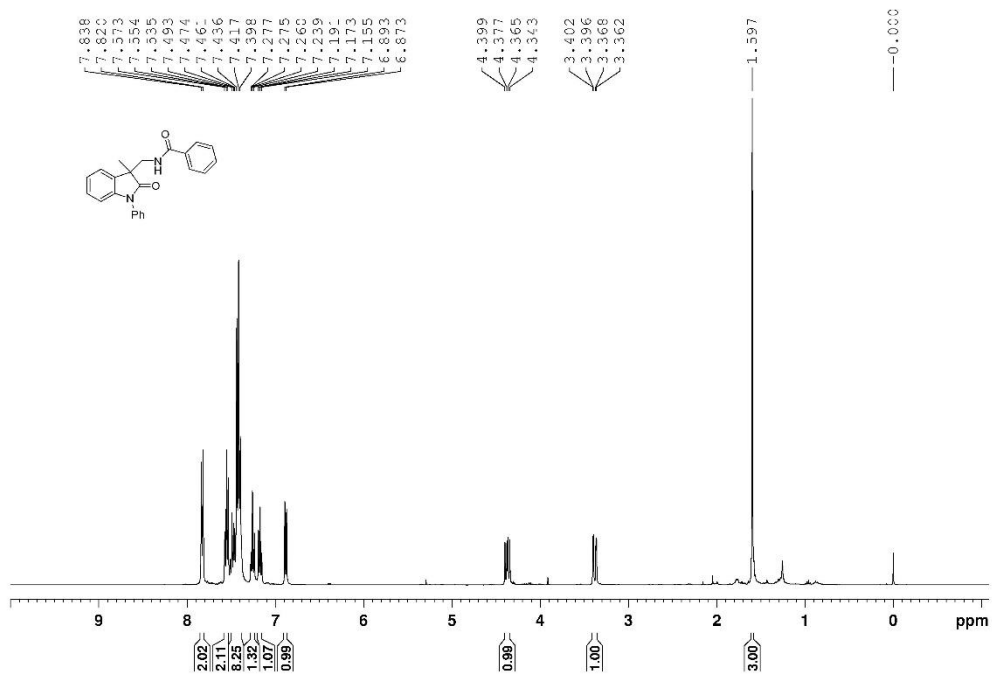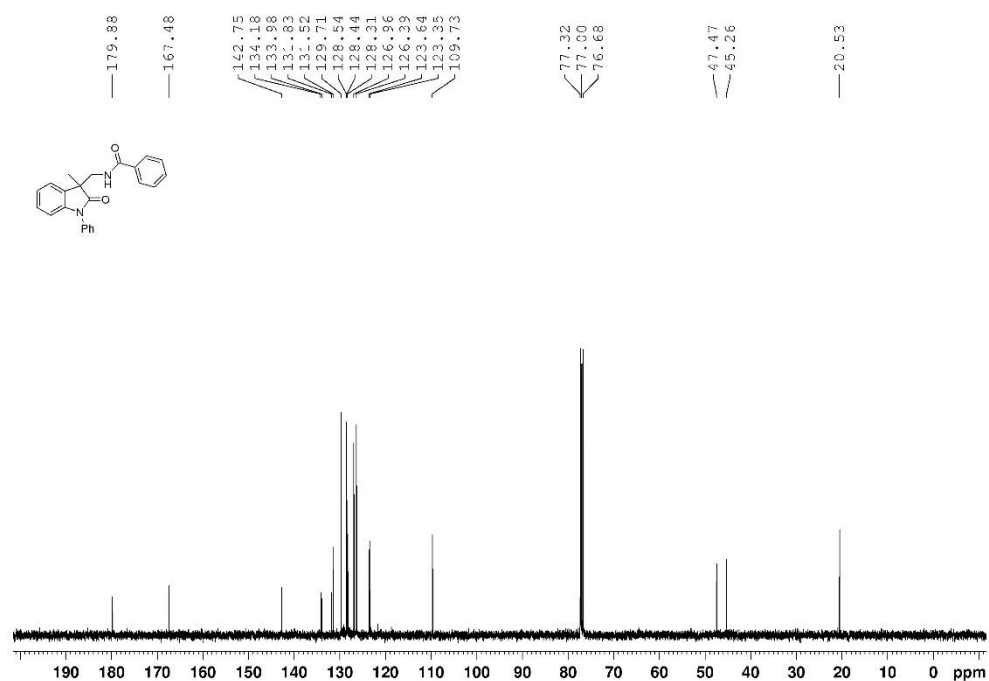

**3t**;  $^1\text{H}$  NMR (400 Hz,  $\text{CDCl}_3$ );  $^{13}\text{C}$  NMR (100 Hz,  $\text{CDCl}_3$ )

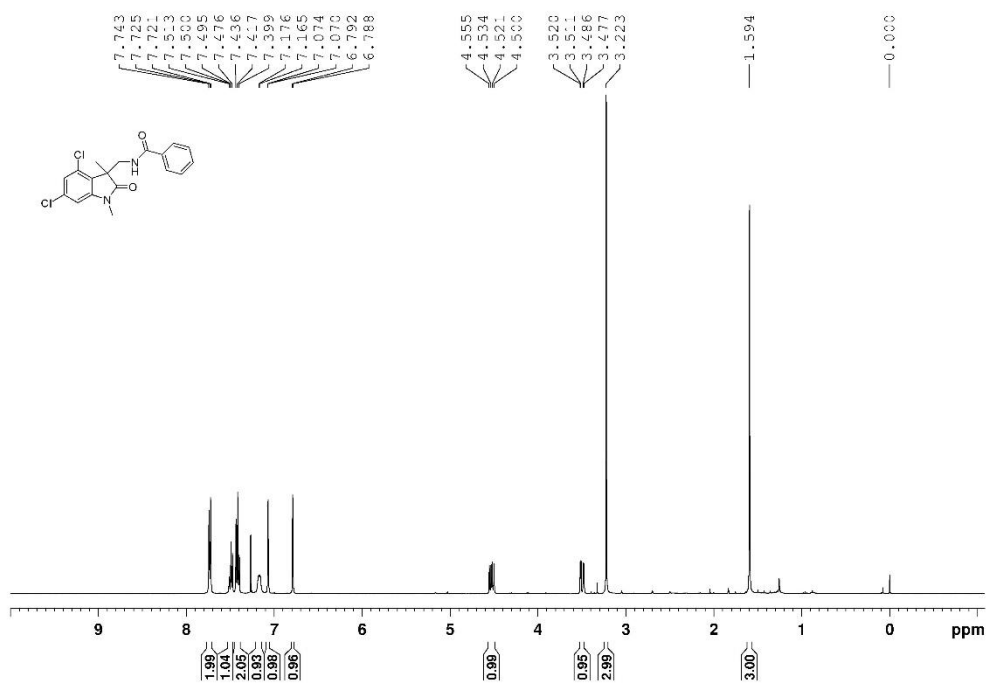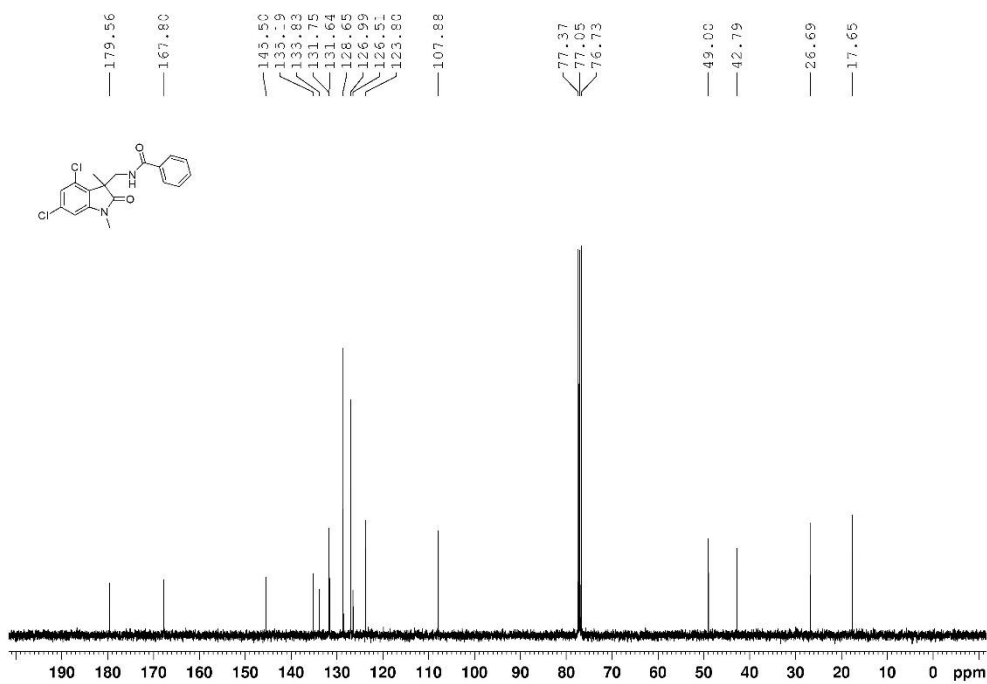

**3u**;  $^1\text{H}$  NMR 600 Hz,  $\text{CDCl}_3$ ;  $^{13}\text{C}$  NMR (150 Hz,  $\text{CDCl}_3$ )

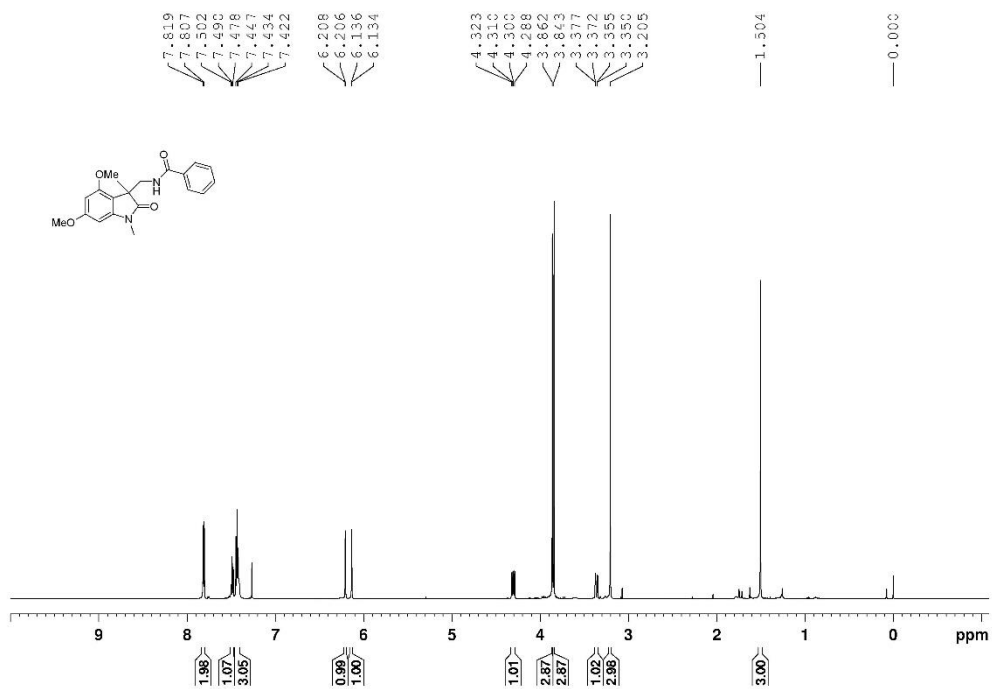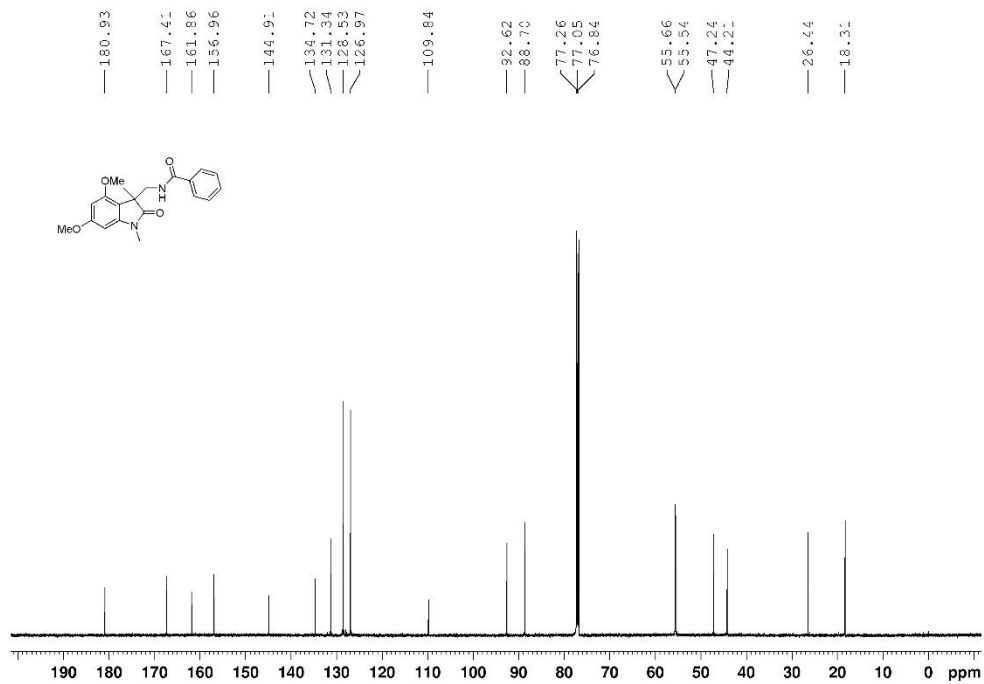

**3ab**;  $^1\text{H}$  NMR (400 Hz,  $\text{CDCl}_3$ );  $^{13}\text{C}$  NMR (100 Hz,  $\text{CDCl}_3$ )

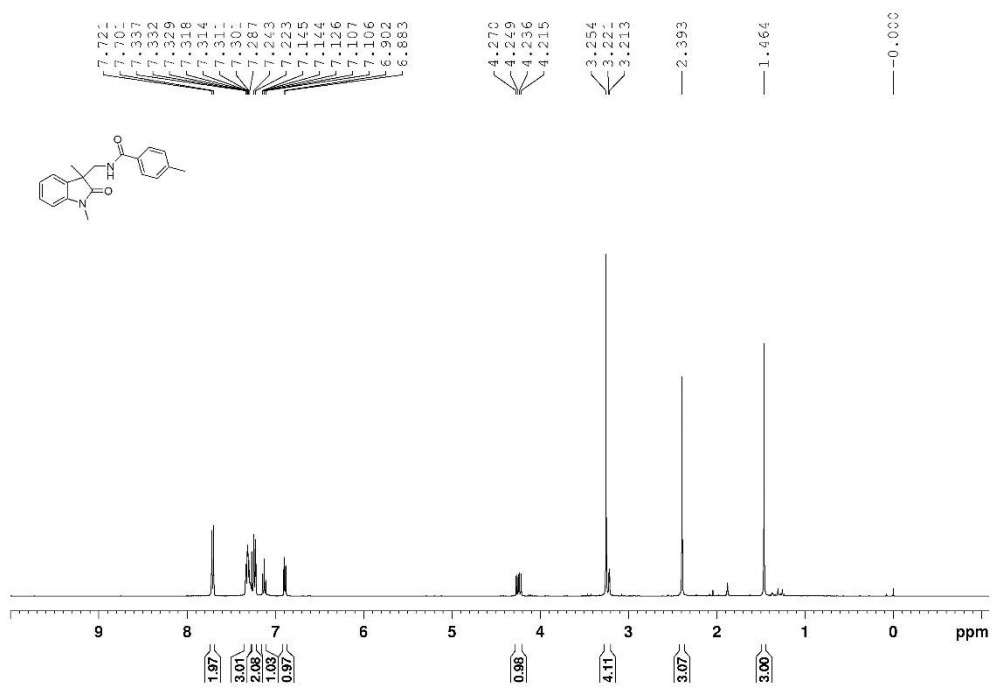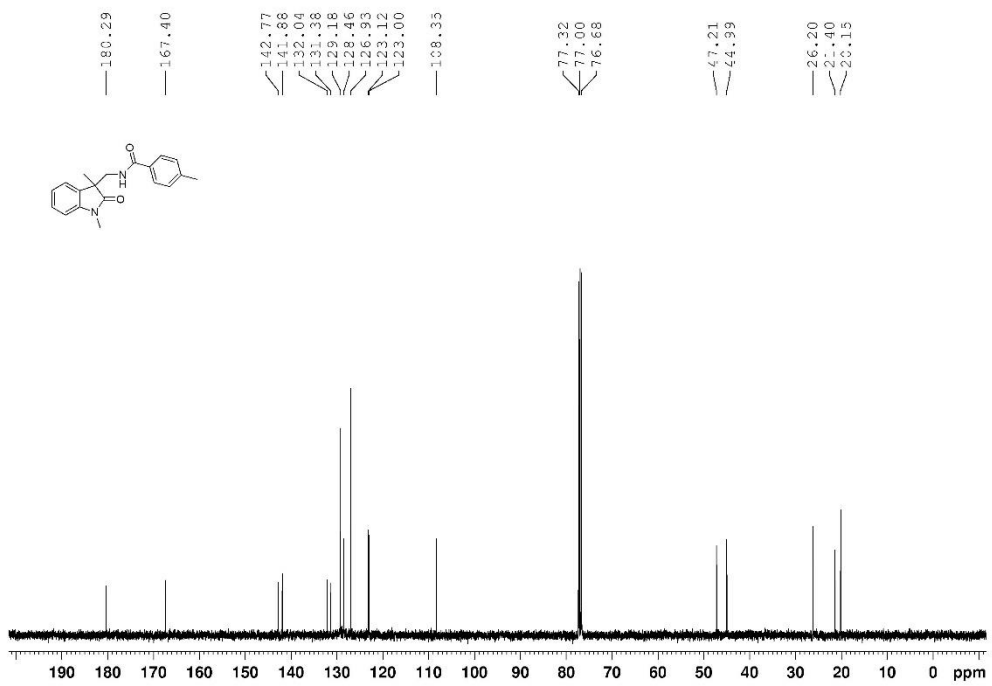

**3ac**;  $^1\text{H}$  NMR (400 Hz,  $\text{CDCl}_3$ );  $^{13}\text{C}$  NMR (100 Hz,  $\text{CDCl}_3$ )

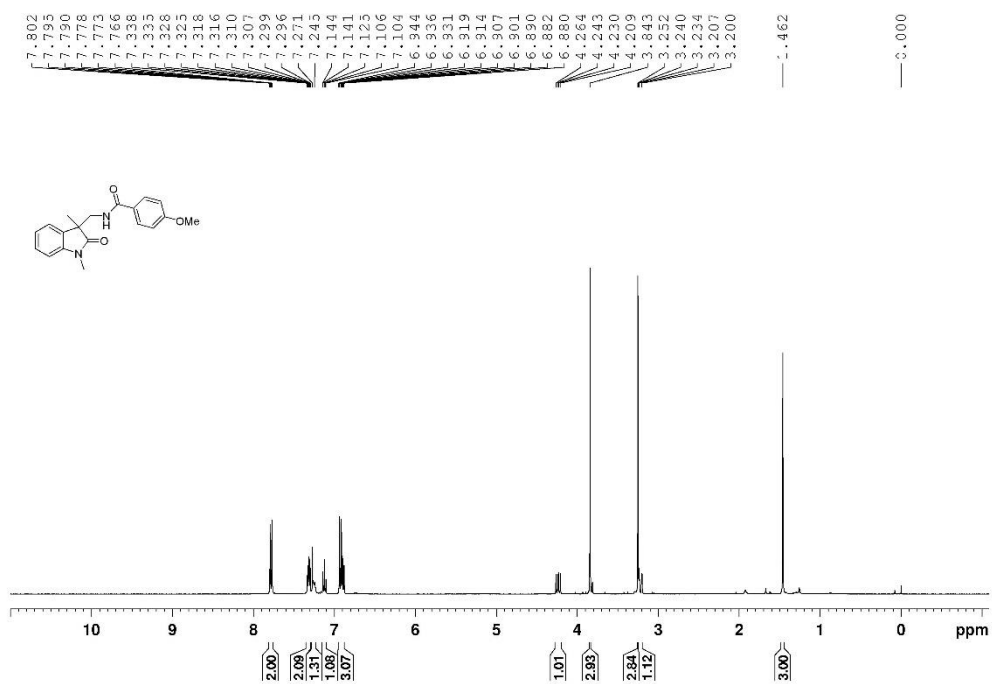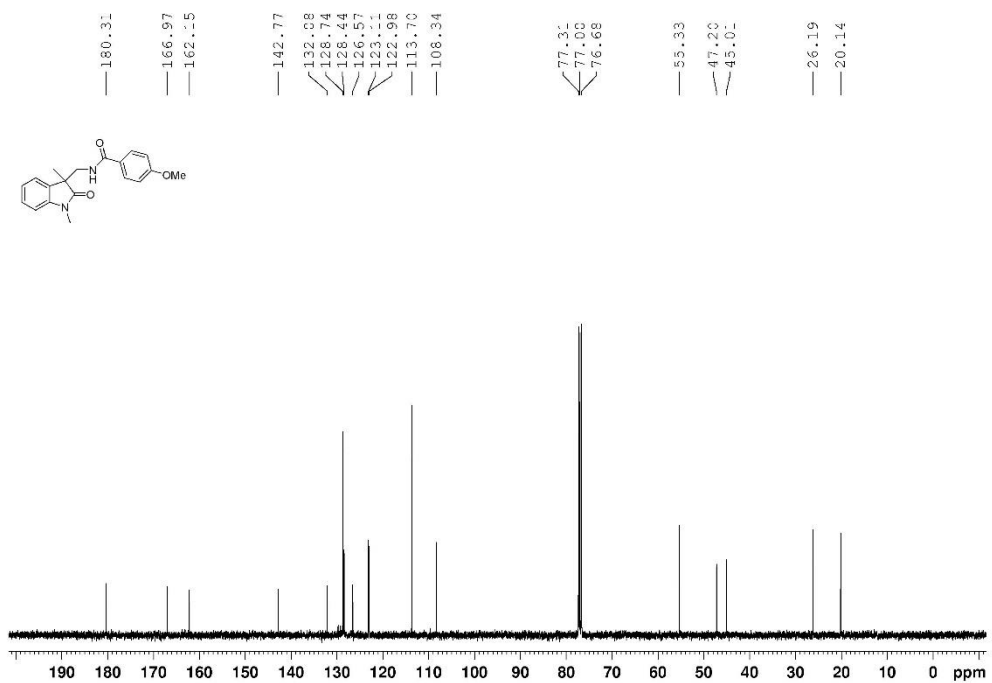

**3ad**;  $^1\text{H}$  NMR (400 Hz,  $\text{CDCl}_3$ );  $^{13}\text{C}$  NMR (100 Hz,  $\text{CDCl}_3$ )

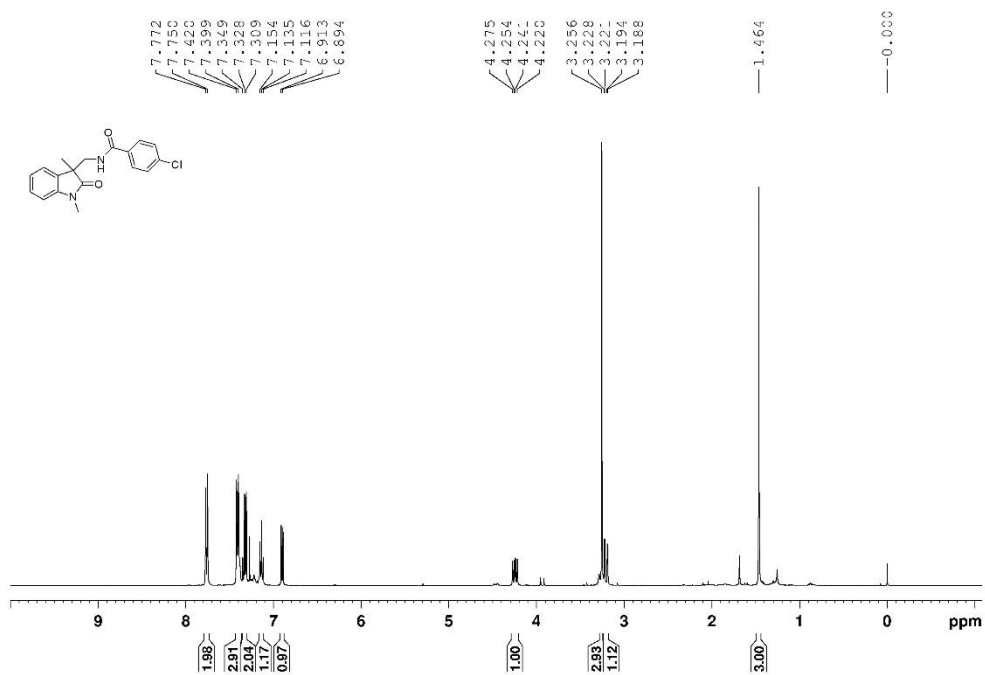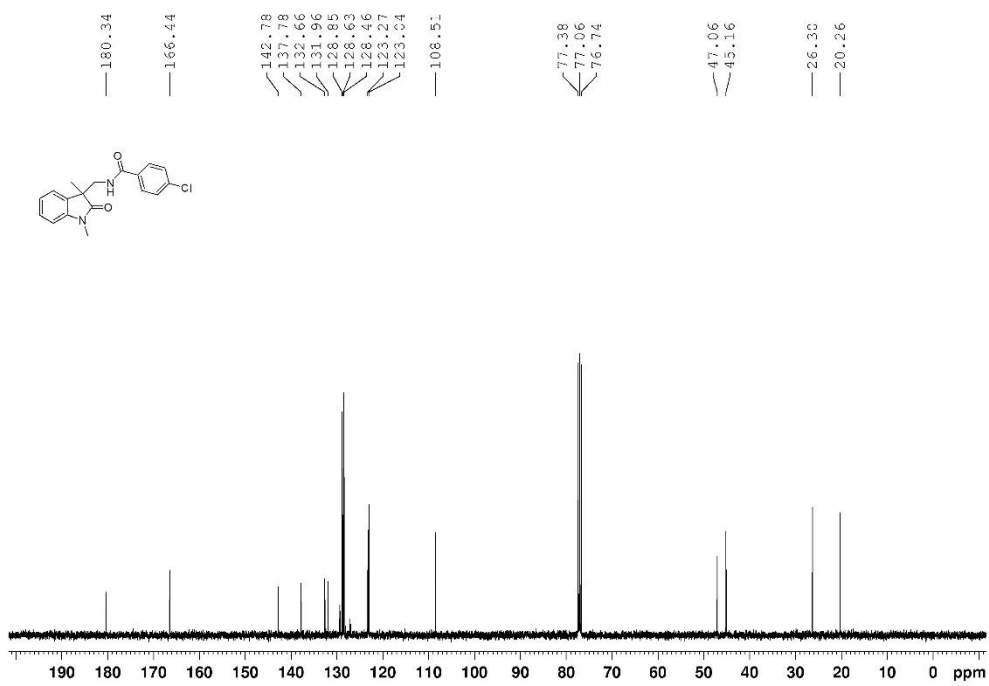

**3ae**;  $^1\text{H}$  NMR (600 Hz,  $\text{CDCl}_3$ );  $^{13}\text{C}$  NMR (150 Hz,  $\text{CDCl}_3$ )

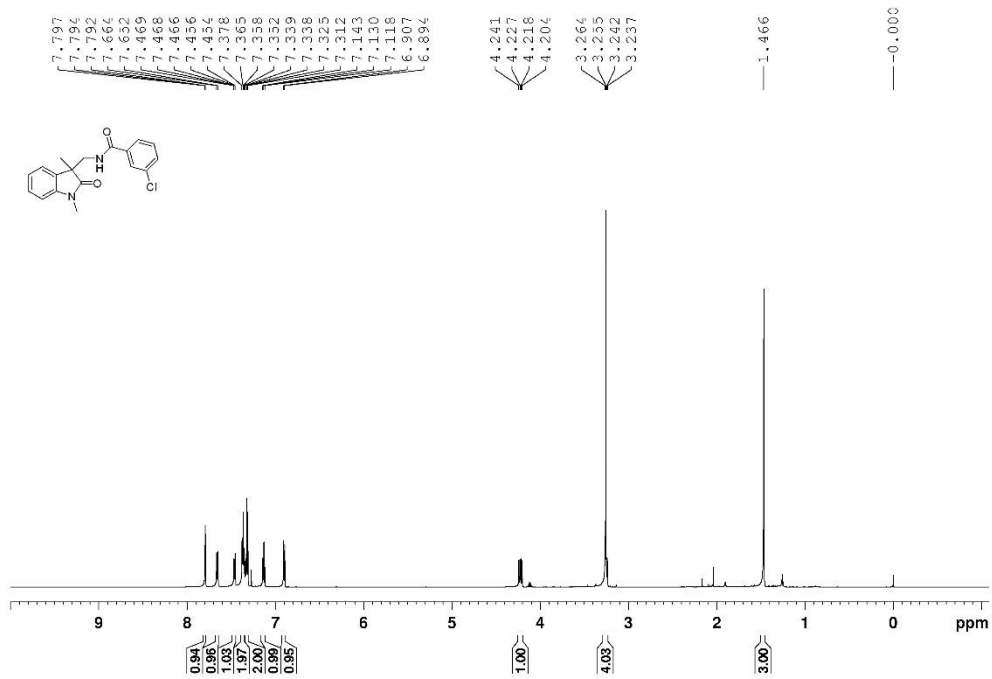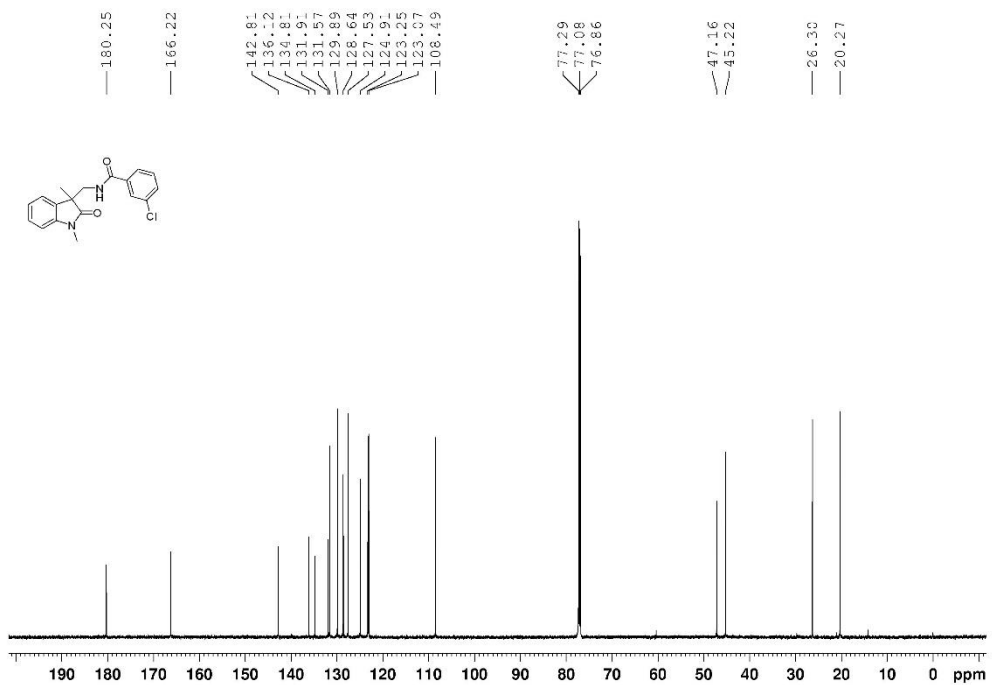

**3af**;  $^1\text{H}$  NMR (600 Hz,  $\text{CDCl}_3$ );  $^{13}\text{C}$  NMR (150Hz,  $\text{CDCl}_3$ )

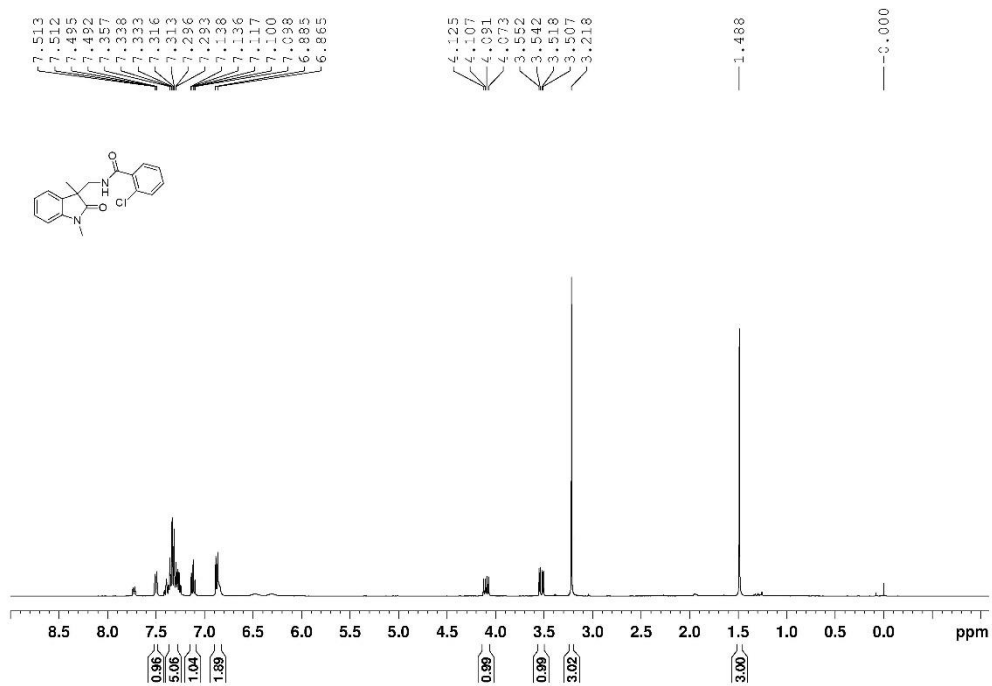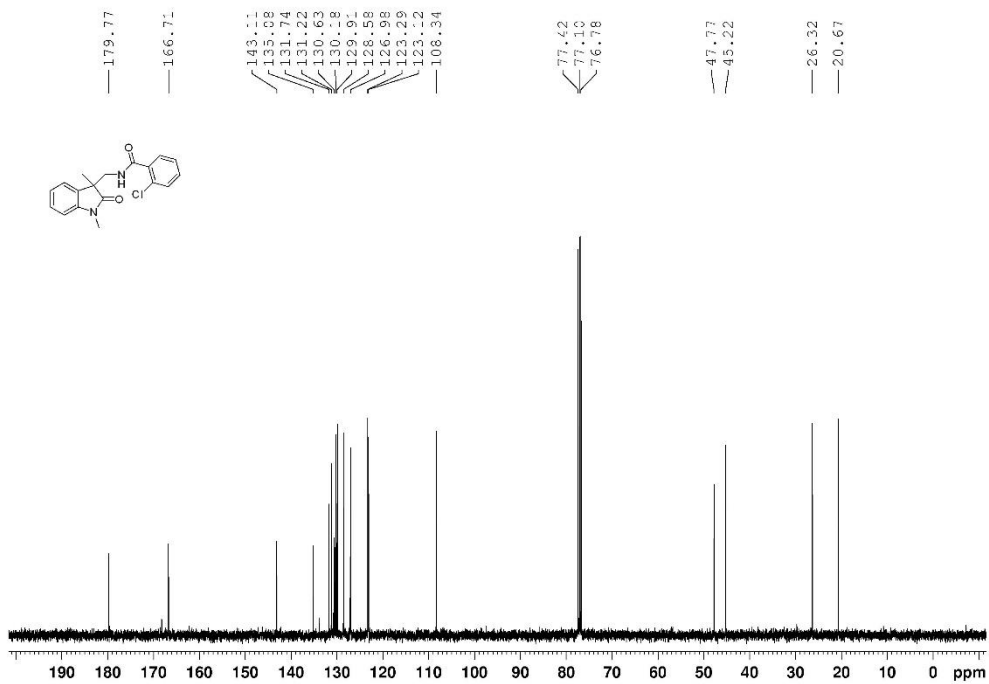



**3ag**;  $^1\text{H}$  NMR (400 Hz,  $\text{CDCl}_3$ );  $^{13}\text{C}$  NMR (100 Hz,  $\text{CDCl}_3$ )

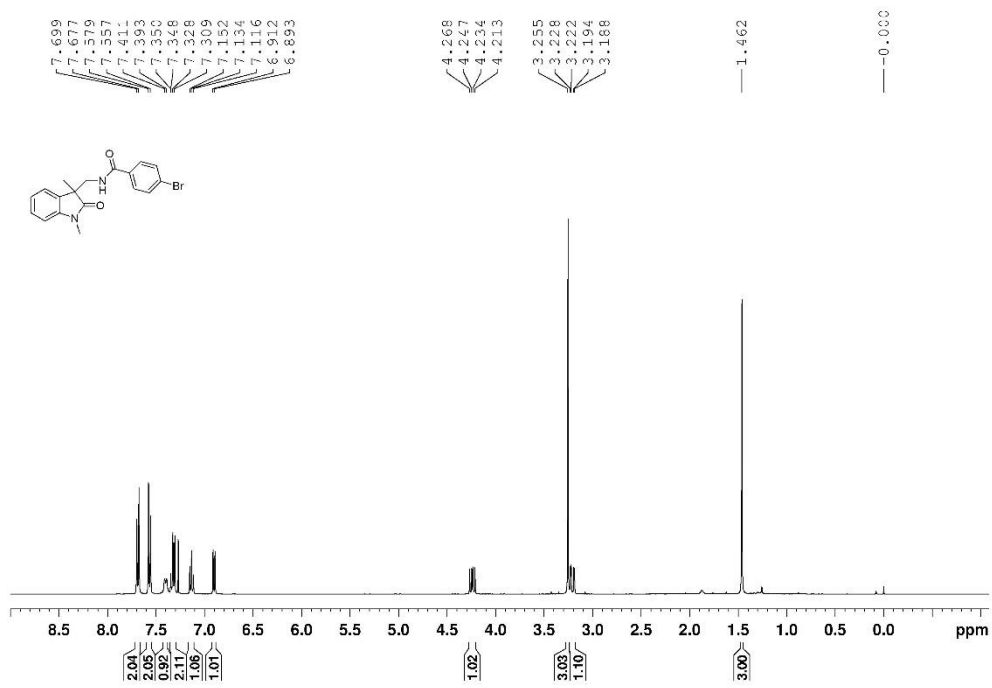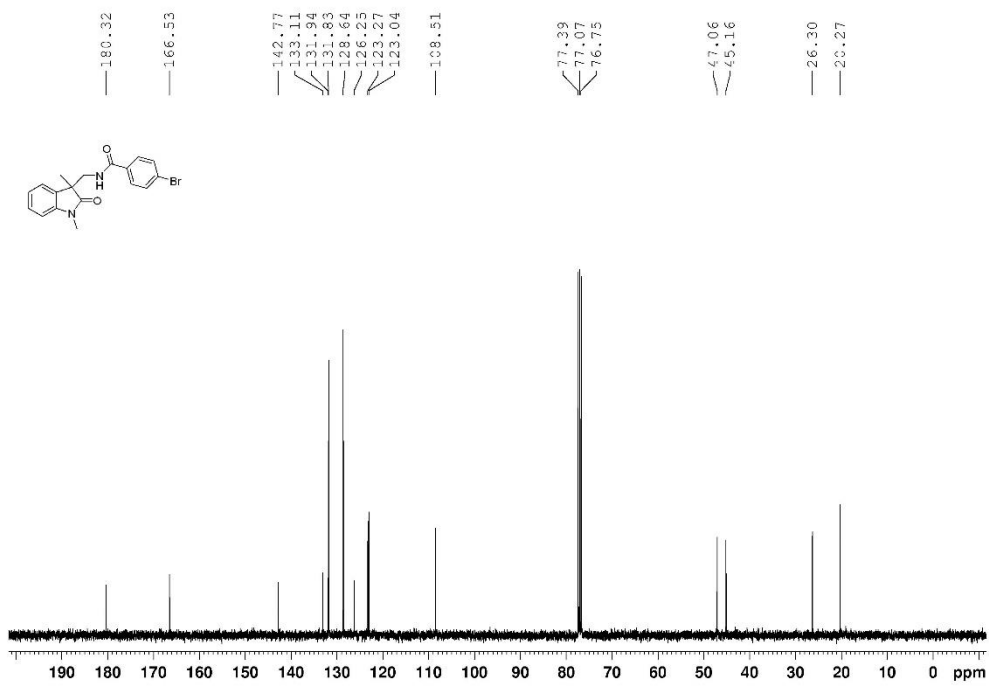

**3ah**;  $^1\text{H}$  NMR (400 Hz,  $\text{CDCl}_3$ );  $^{13}\text{C}$  NMR (100 Hz,  $\text{CDCl}_3$ );  $^{19}\text{F}$  NMR (376 Hz,  $\text{CDCl}_3$ )

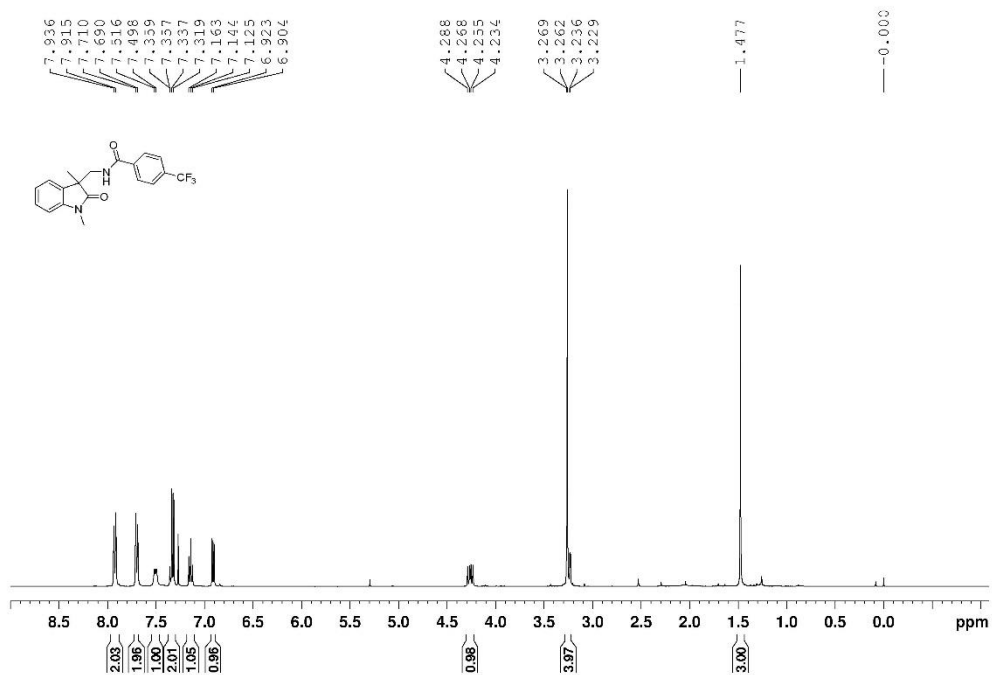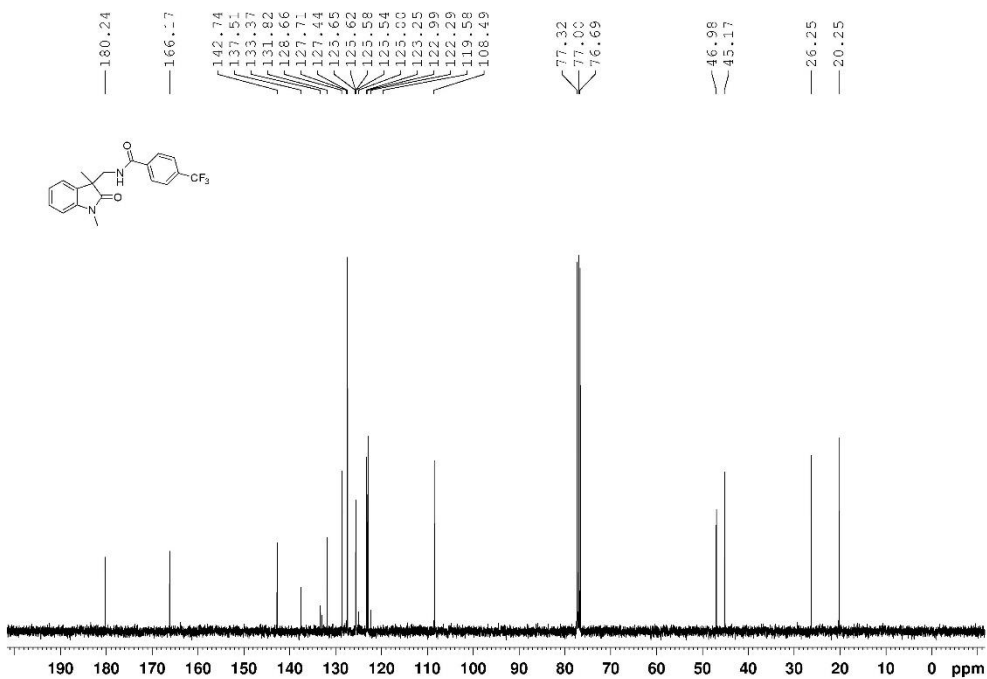

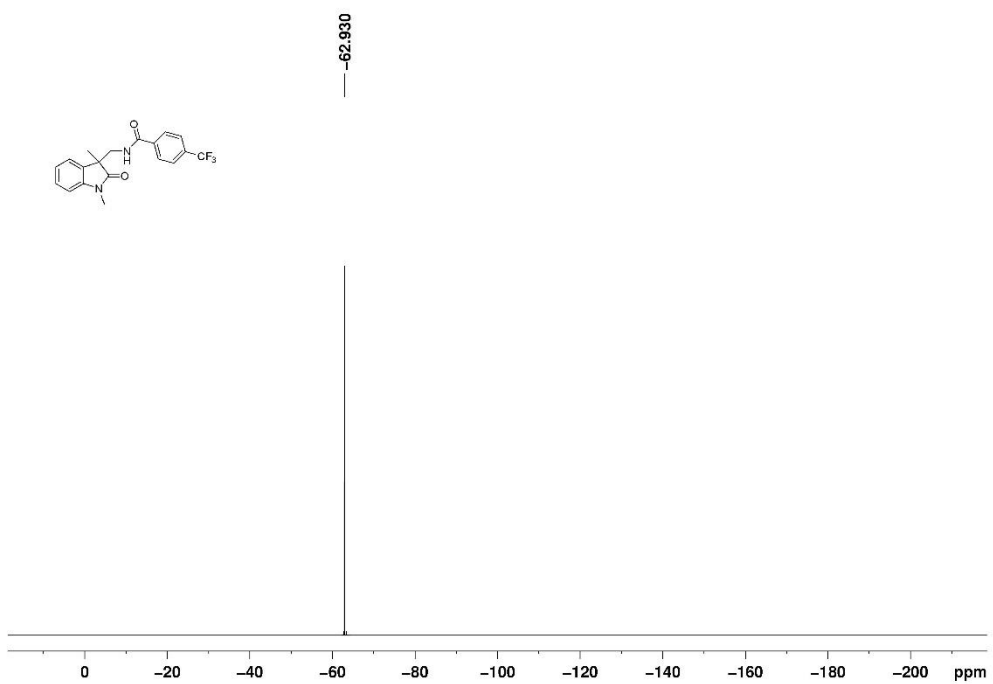

**3ai**;  $^1\text{H}$  NMR (400 Hz,  $\text{CDCl}_3$ );  $^{13}\text{C}$  NMR (100 Hz,  $\text{CDCl}_3$ )

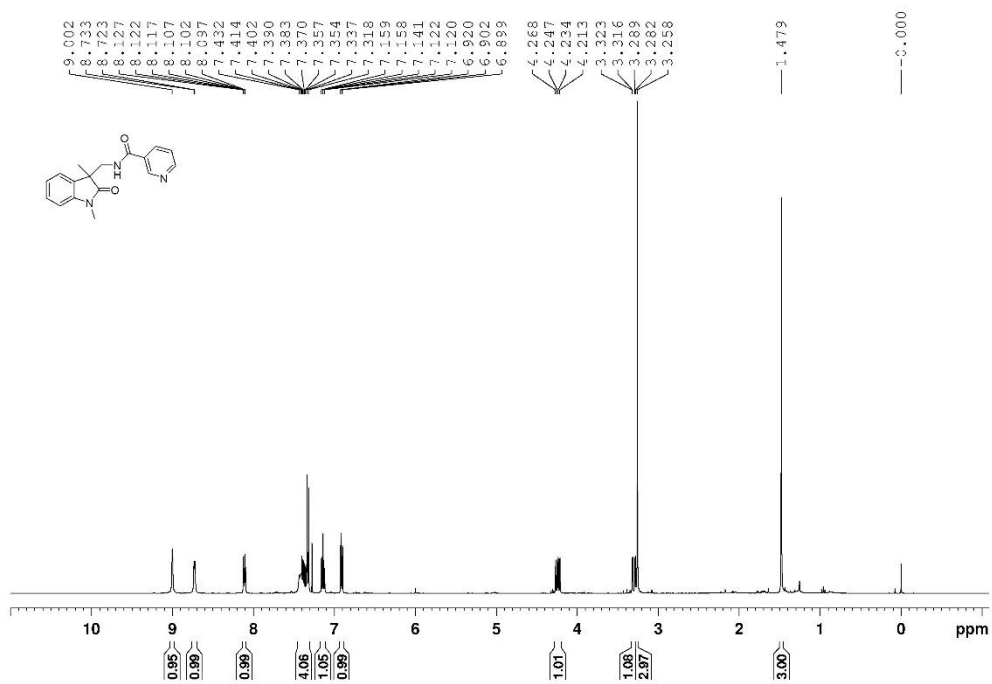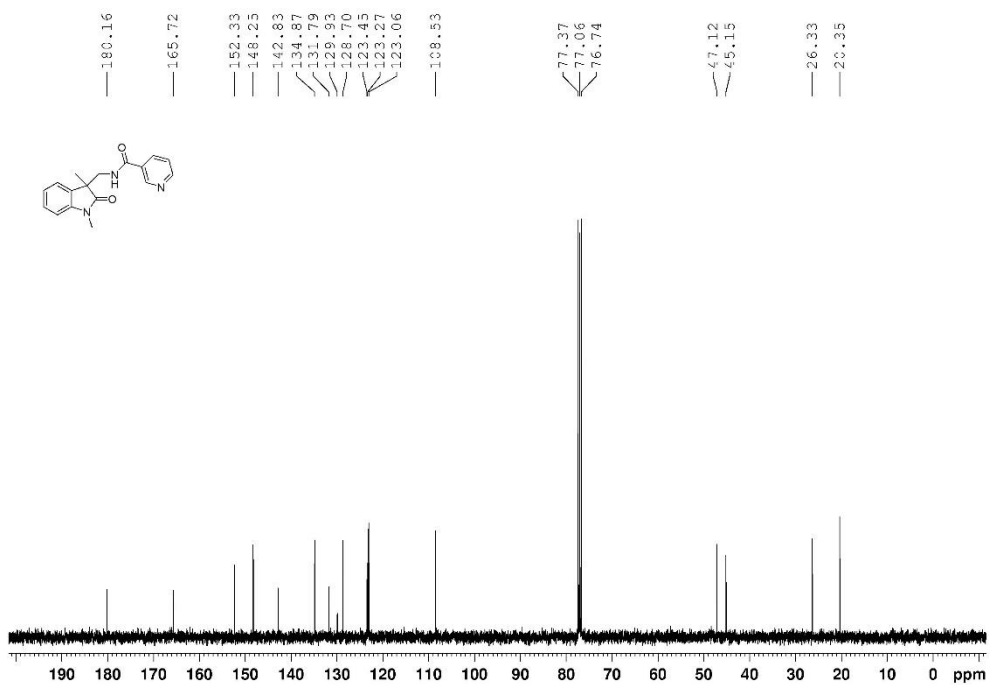

**3aj**;  $^1\text{H}$  NMR (400 Hz,  $\text{CDCl}_3$ );  $^{13}\text{C}$  NMR (100 Hz,  $\text{CDCl}_3$ )

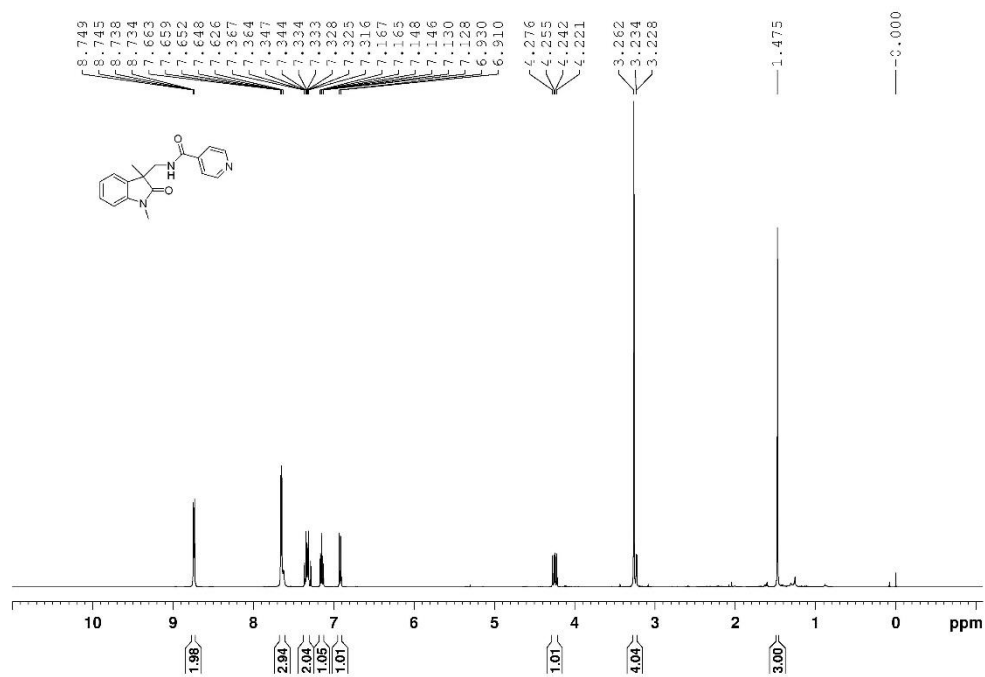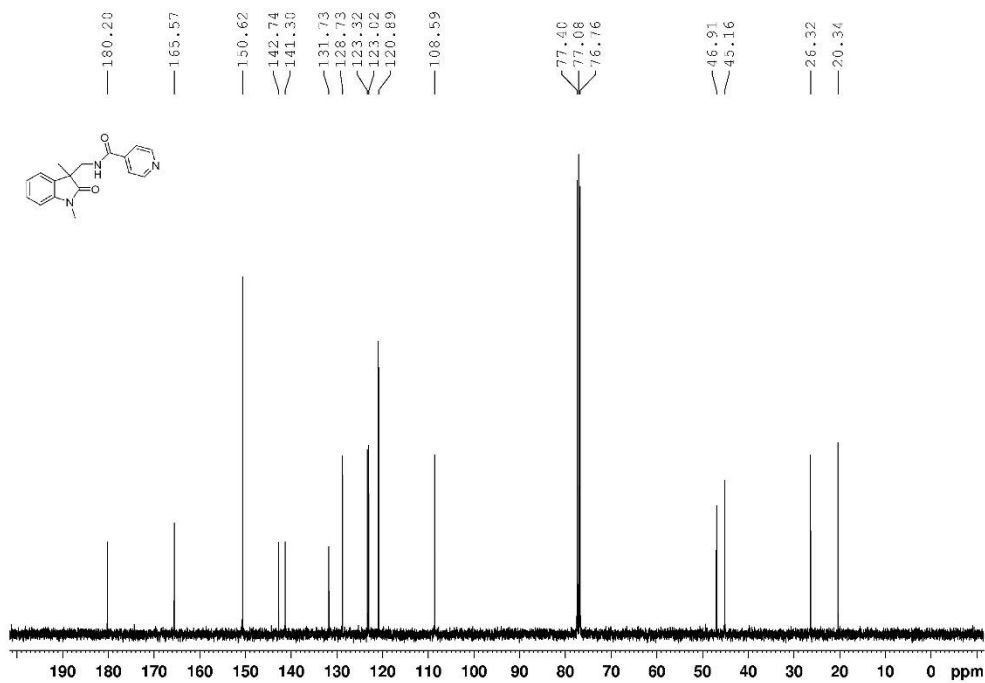

**3ak**;  $^1\text{H}$  NMR (400 Hz,  $\text{CDCl}_3$ );  $^{13}\text{C}$  NMR (100 Hz,  $\text{CDCl}_3$ )

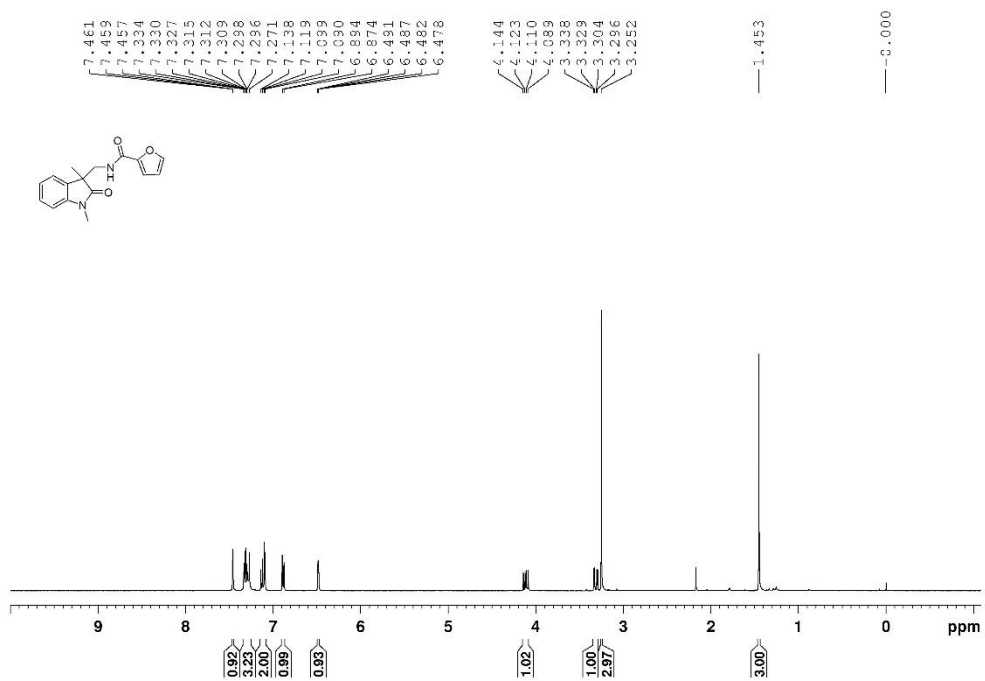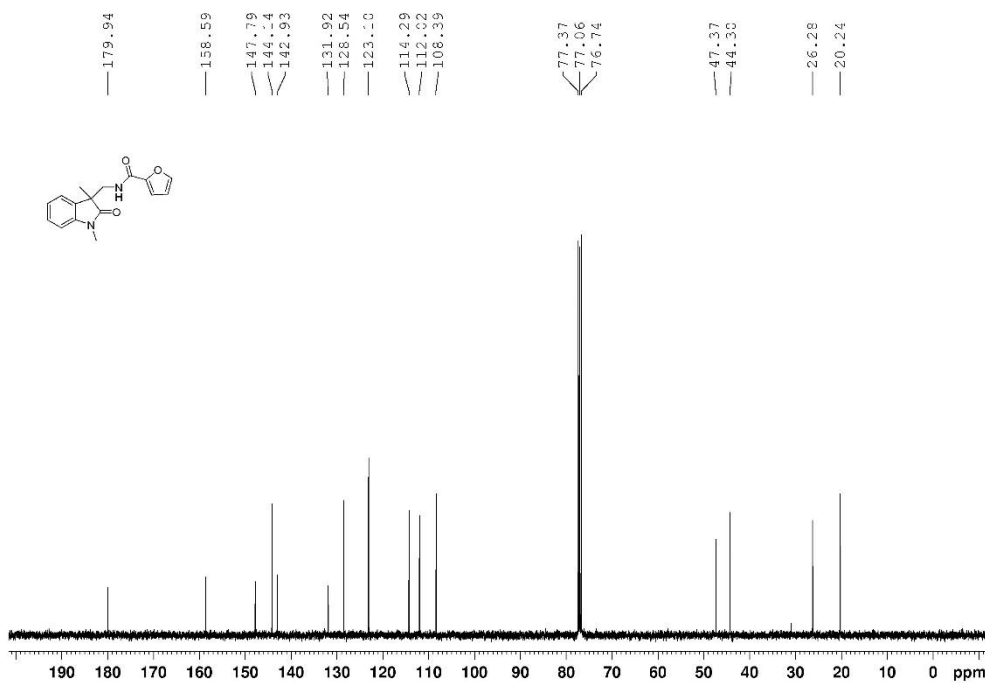

**3al**;  $^1\text{H}$  NMR (400 Hz,  $\text{CDCl}_3$ );  $^{13}\text{C}$  NMR (100 Hz,  $\text{CDCl}_3$ )

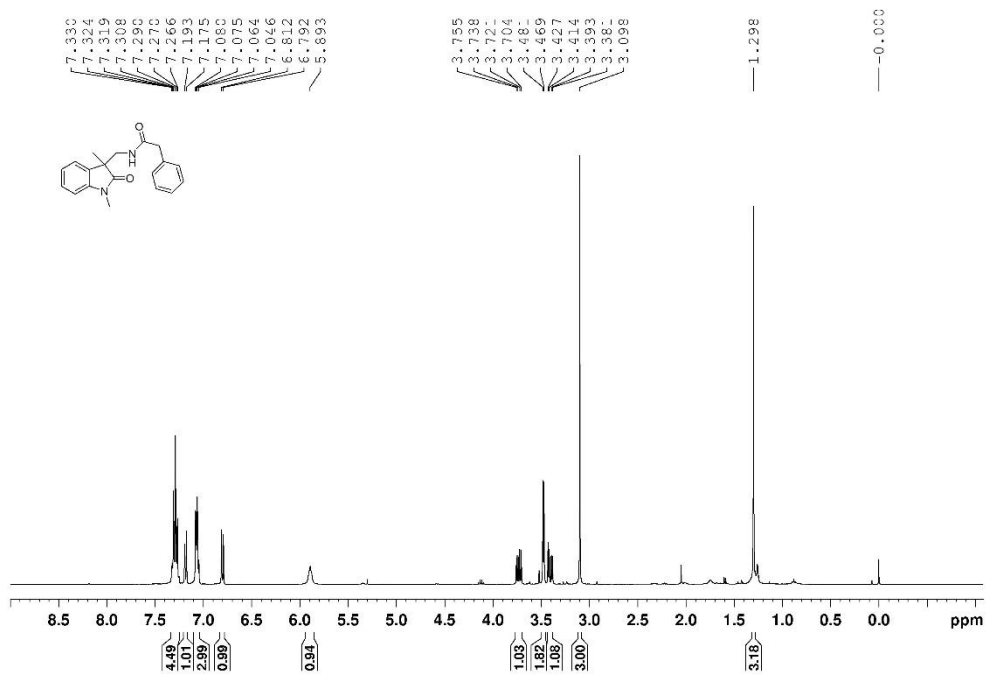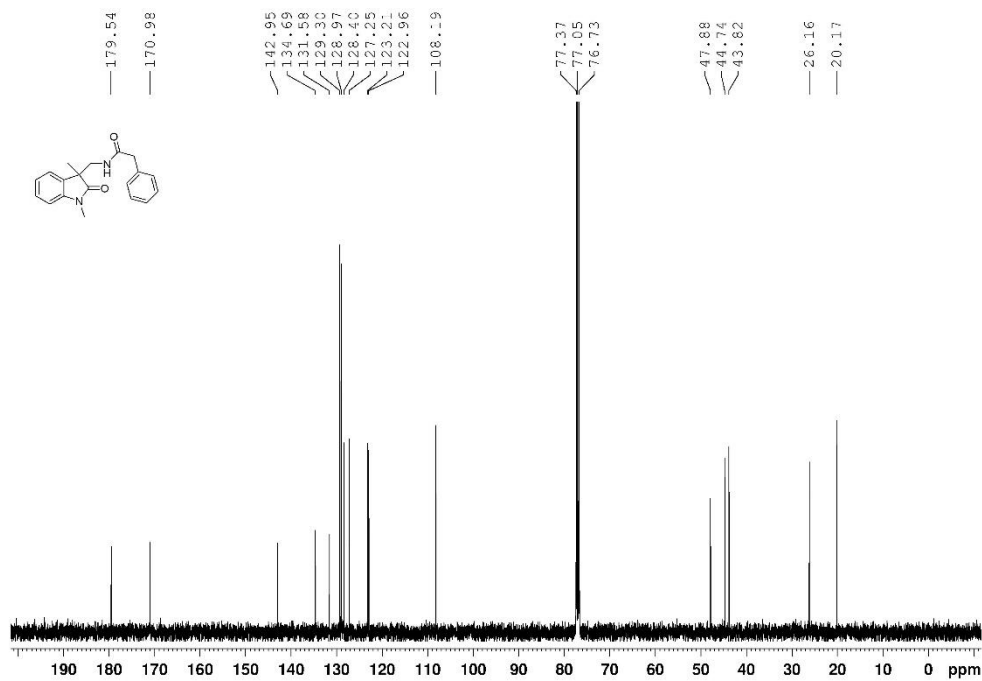

**3am**;  $^1\text{H}$  NMR (400 Hz,  $\text{CDCl}_3$ );  $^{13}\text{C}$  NMR (100 Hz,  $\text{CDCl}_3$ )

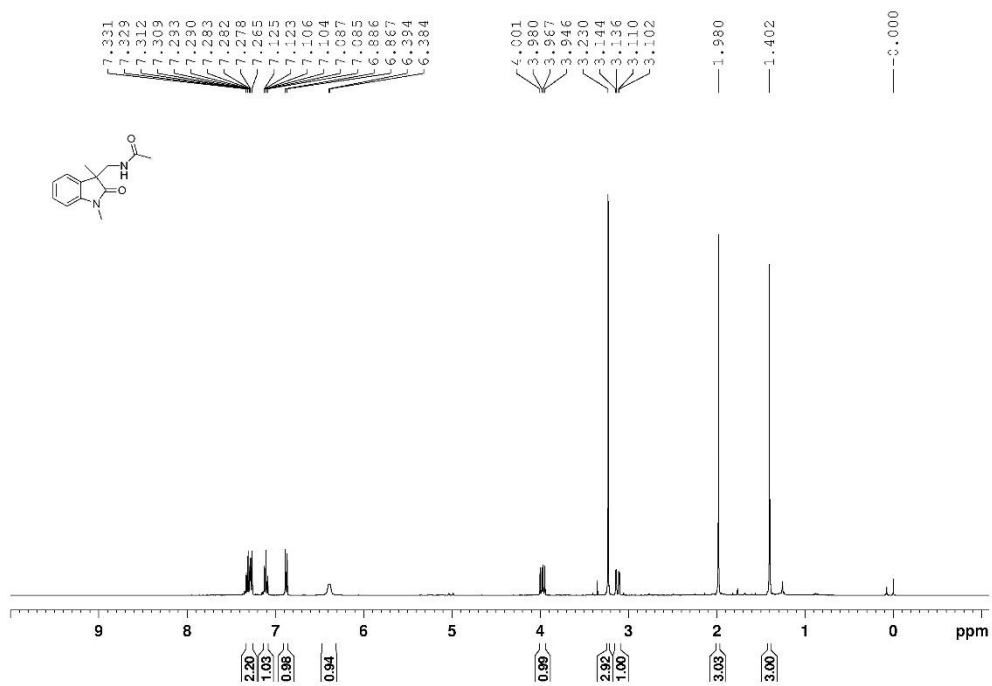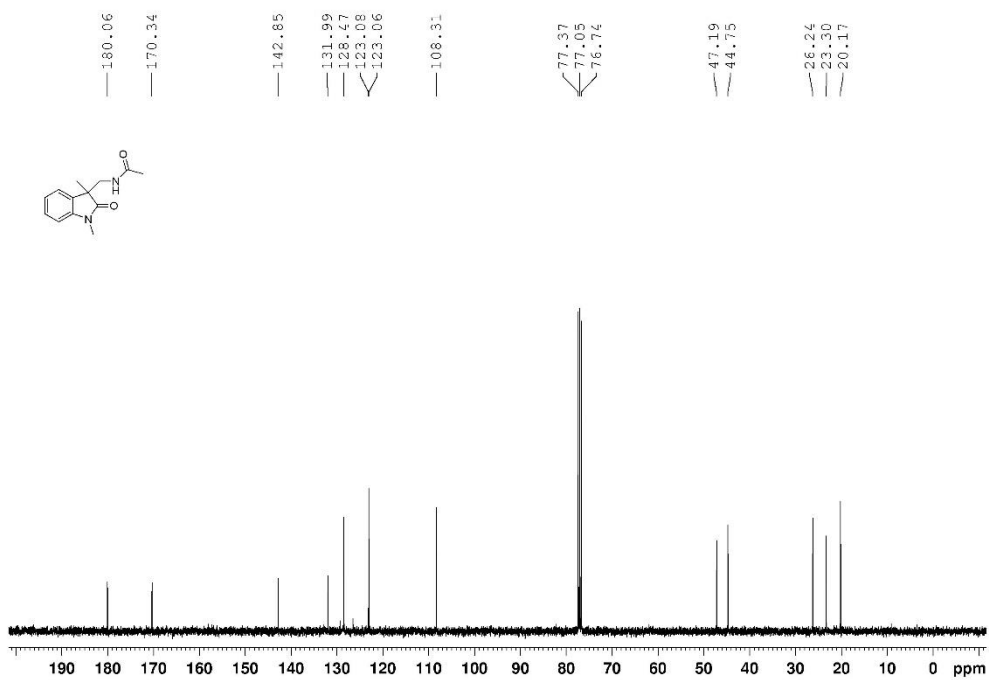



**3an**;  $^1\text{H}$  NMR (400 Hz,  $\text{CDCl}_3$ );  $^{13}\text{C}$  NMR (100 Hz,  $\text{CDCl}_3$ )

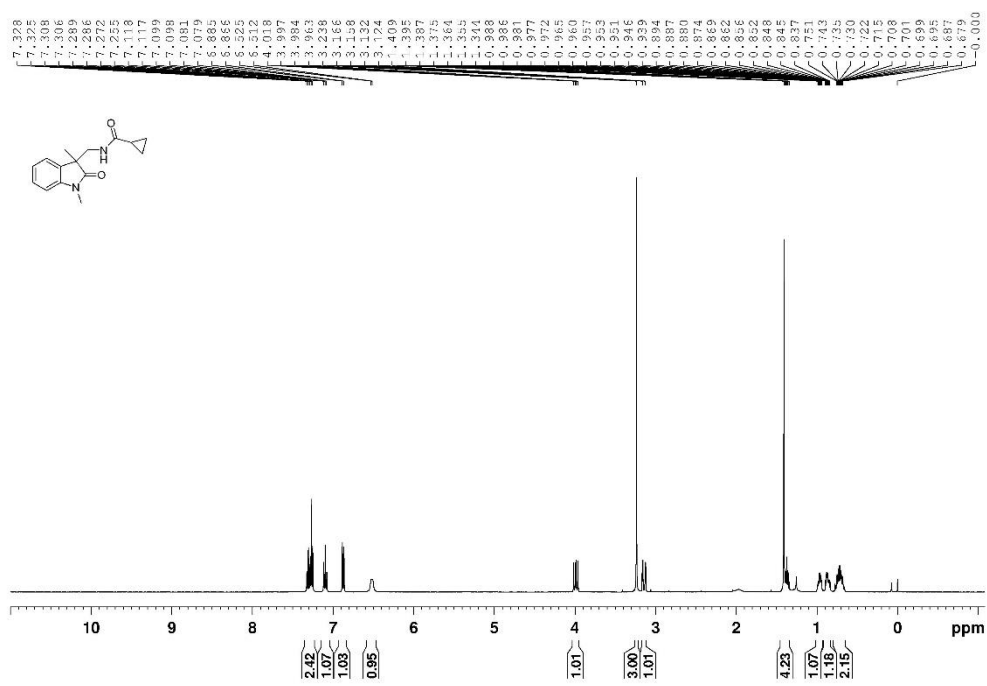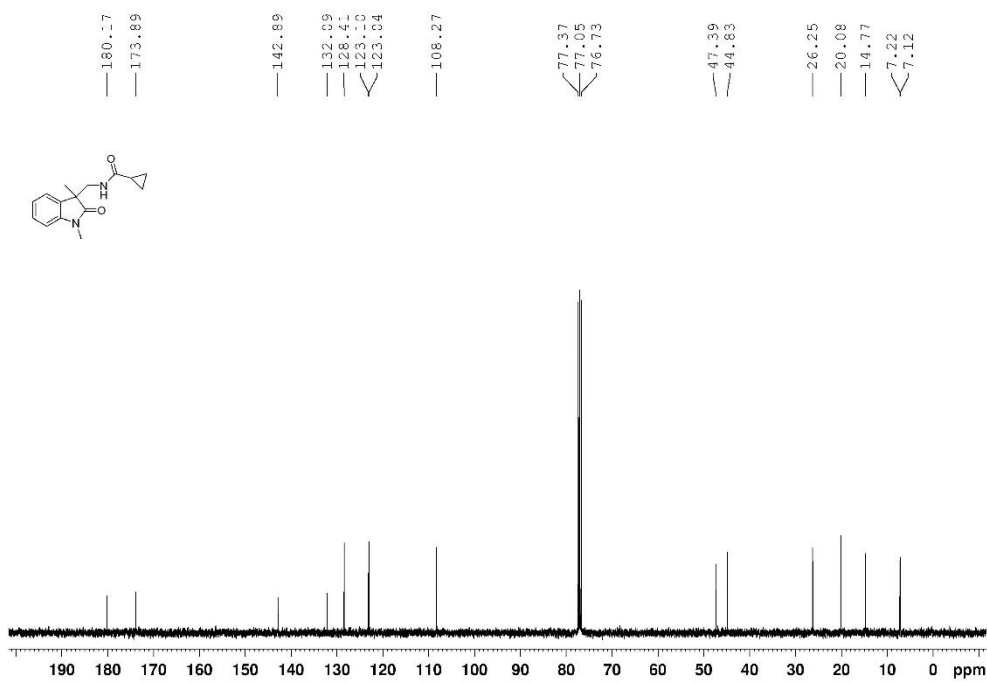

**3ao**;  $^1\text{H}$  NMR (400 Hz,  $\text{CDCl}_3$ );  $^{13}\text{C}$  NMR (100 Hz,  $\text{CDCl}_3$ )

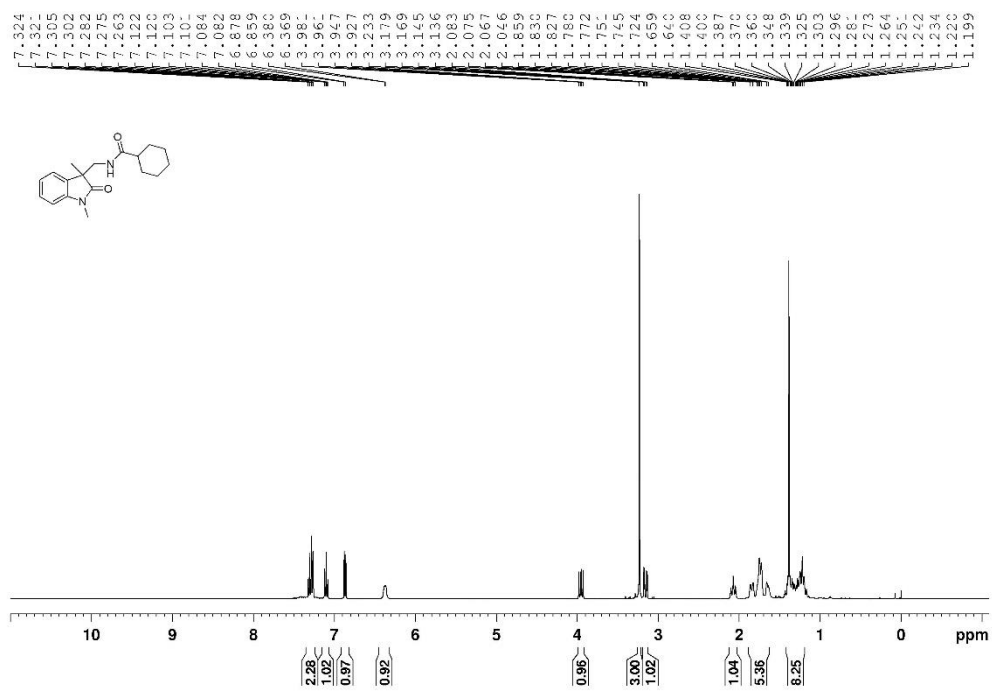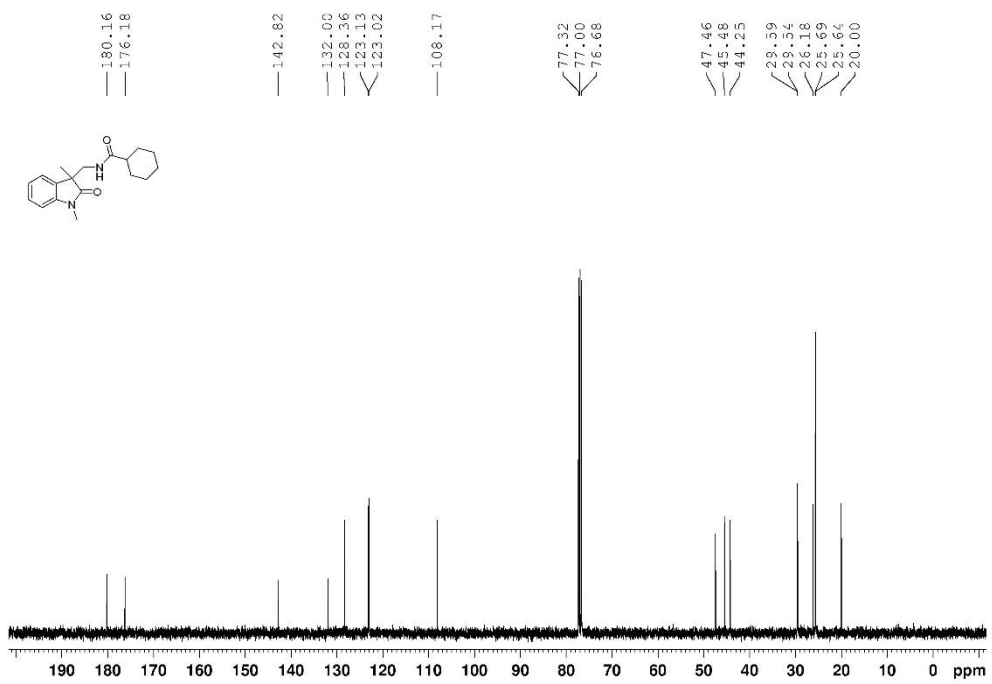

**3ap**;  $^1\text{H}$  NMR (400 Hz,  $\text{CDCl}_3$ );  $^{13}\text{C}$  NMR (100 Hz,  $\text{CDCl}_3$ )

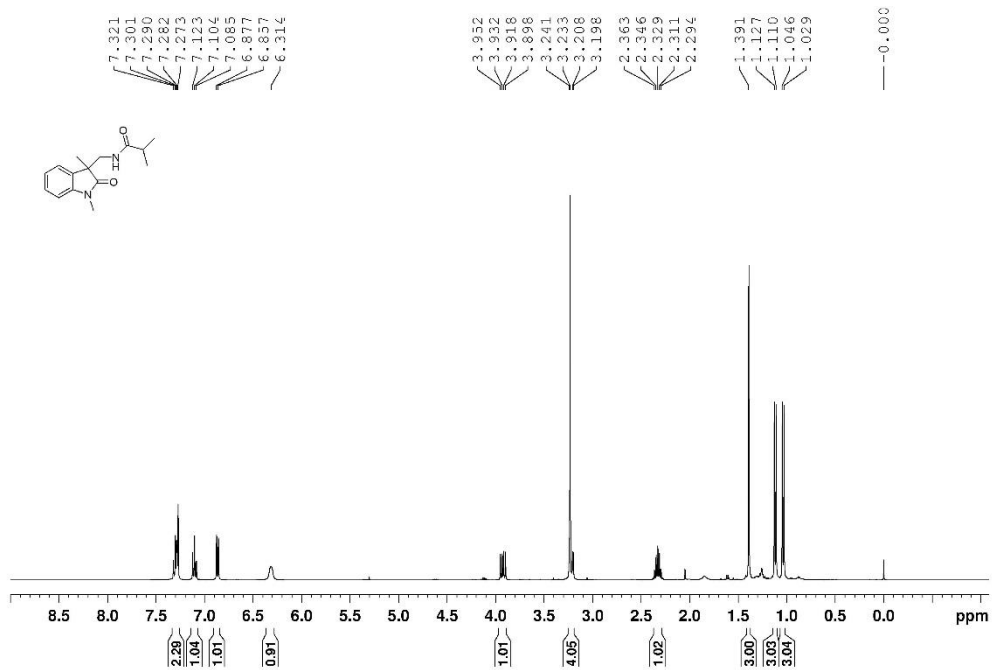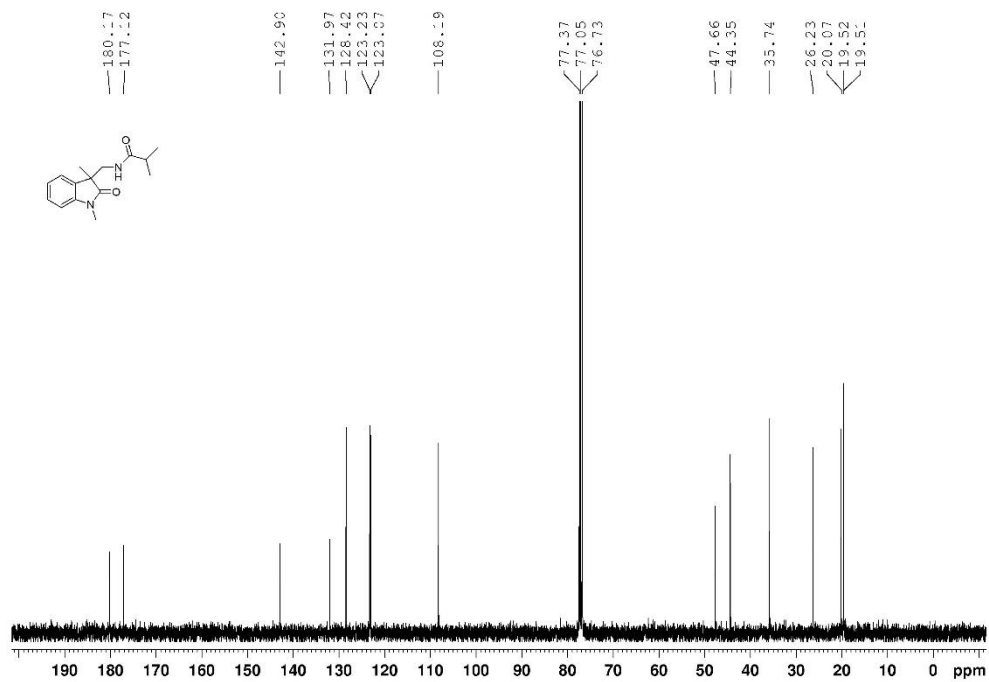

**3aq**;  $^1\text{H}$  NMR (400 Hz,  $\text{CDCl}_3$ );  $^{13}\text{C}$  NMR (100 Hz,  $\text{CDCl}_3$ )

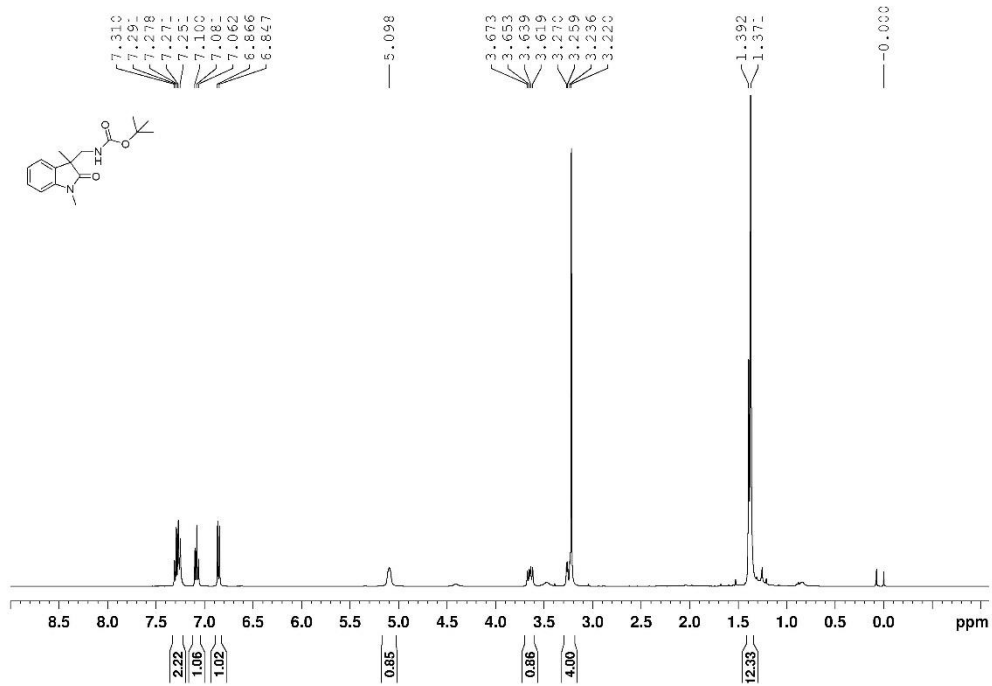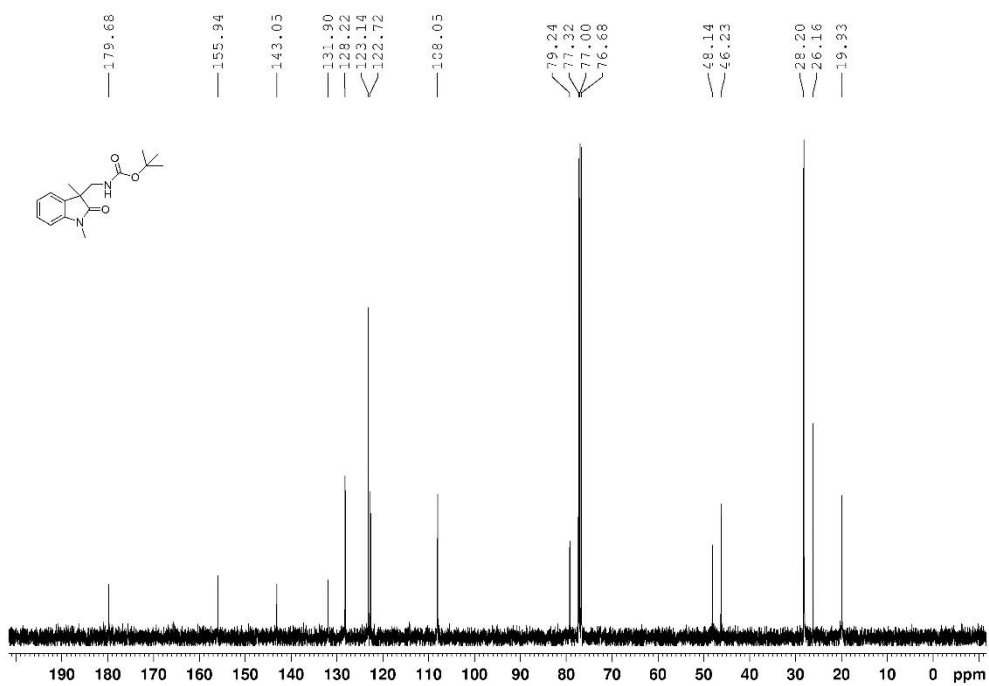

Supplement: d2qo00127f1.pdf [file d2qo00127f1.pdf]
